# Supplementary material for: Tracking the Fragile X Mental Retardation Protein in a Highly Ordered Neuronal RiboNucleoParticles Population: A Link between Stalled Polyribosomes and RNA Granules
Source: PubMed Central journal article supplement (PMC4963131; doi:10.1371/journal.pgen.1006192), 2016-07-27
Supplement: pgen.1006192.s006.pdf [file pgen.1006192.s006.pdf]

| Entry name | Protein name                                                               | Alternate names                           | UniProt Accession | Gene name | MW (KDa) | Normalized spectrum counts |               |           |
|------------|----------------------------------------------------------------------------|-------------------------------------------|-------------------|-----------|----------|----------------------------|---------------|-----------|
|            |                                                                            |                                           |                   |           |          | Granules                   | Polyribosomes | Ratio G/P |
| CAPR1      | Caprin-1                                                                   | Caprin1 Gpiap,Gpiap1,Gpip137,M11s1,Rng105 | Q60865            | Caprin1   | 78       | 48                         | 37            | 1,30      |
| RL4        | 60S ribosomal protein L4                                                   | Rpl4                                      | Q9D8E6            | Rpl4      | 47       | 45                         | 77            | 0,58      |
| G3BP2      | Ras GTPase-activating protein-binding protein 2                            | G3bp2                                     | P97379            | G3bp2     | 54       | 41                         | 24            | 1,71      |
| HSP7C      | Heat shock cognate 71 kDa protein                                          | Hspa8 Hsc70,Hsc73                         | P63017            | Hspa8     | 71       | 41                         | 23            | 1,78      |
| MYH10      | Myosin-10                                                                  | Myh10                                     | Q61879            | Myh10     | 229      | 41                         | 0             | only in G |
| Q5FWB6     | 60S acidic ribosomal protein P0                                            | Rplp0 mCG_17387                           | Q5FWB6            | Rplp0     | 34       | 39                         | 47            | 0,83      |
| PABP1      | Polyadenylate-binding protein 1                                            | Pabpc1 Pabp1                              | P29341            | Pabpc1    | 71       | 38                         | 40            | 0,95      |
| ACTG       | Actin, cytoplasmic 2                                                       | Actg1 Actg                                | P63260            | Actg1     | 42       | 35                         | 3             | 11,67     |
| RS3        | 40S ribosomal protein S3                                                   | Rps3                                      | P62908            | Rps3      | 27       | 32                         | 31            | 1,03      |
| RSSA       | 40S ribosomal protein SA                                                   | Rpsa Lamr1,P40-8                          | P14206            | Rpsa      | 33       | 32                         | 27            | 1,19      |
| GBLP       | Guanine nucleotide-binding protein ...                                     | Gnb211 Gnb2-rs1                           | P68040            | Gnb211    | 35       | 29                         | 26            | 1,12      |
| MYO5A      | Myosin-5a                                                                  | Myo5a                                     | B8JK04            | Myo5a     | 215      | 29                         | 7             | 4,14      |
| TBB2A      | Tubulin beta-2A chain                                                      | Tubb2a Tubb2                              | Q7TMM9            | Tubb2a    | 50       | 29                         | 10            | 2,90      |
| RS4X       | 40S ribosomal protein S4, X isoform                                        | Rps4x Rps4                                | P62702            | Rps4x     | 30       | 25                         | 27            | 0,93      |
| TBB5       | Tubulin beta-5 chain                                                       | Tubb5                                     | P99024            | Tubb5     | 50       | 25                         | 0             | only in G |
| YBOX1      | Nuclease-sensitive element-binding protein 1                               | Ybx1 Msy-1,Msy1,Nsep1,Yb1                 | P62960            | Ybx1      | 36       | 25                         | 21            | 1,19      |
| RL7A       | 60S ribosomal protein L7a                                                  | Rpl7a Surf-3,Surf3                        | P12970            | Rpl7a     | 30       | 22                         | 31            | 0,71      |
| RL3        | 60S ribosomal protein L3                                                   | Rpl3                                      | P27659            | Rpl3      | 46       | 20                         | 43            | 0,47      |
| Q80Y51     | ELAV (Embryonic lethal, abnormal vision, Drosophila)-like 2 (Hu antigen B) | Elavl2                                    | Q80Y51            | Elavl2    | 41       | 19                         | 18            | 1,06      |
| RL12       | 60S ribosomal protein L12                                                  | Rpl12                                     | P35979            | Rpl12     | 18       | 19                         | 17            | 1,12      |
| RL6        | 60S ribosomal protein L6                                                   | Rpl6                                      | P47911            | Rpl6      | 34       | 19                         | 43            | 0,44      |
| Q9CXQ0     | ELAV (Embryonic lethal, abnormal vision, Drosophila)-like 4 (Hu antigen D) | Elavl4                                    | Q9CXQ0            | Elavl4    | 41       | 17                         | 13            | 1,31      |
| RL5        | 60S ribosomal protein L5                                                   | Rpl5                                      | P47962            | Rpl5      | 34       | 17                         | 19            | 0,89      |
| RENT1      | Regulator of nonsense transcripts 1                                        | Upf1 Rent1                                | Q9EPU0            | Upf1      | 124      | 17                         | 29            | 0,59      |
| GRP78      | 78 kDa glucose-regulated protein                                           | Hspa5 Grp78                               | P20029            | Hspa5     | 72       | 16                         | 0             | only in G |
| RL10       | 60S ribosomal protein L10                                                  | Rpl10 Qm                                  | Q6ZWW3            | Rpl10     | 25       | 16                         | 22            | 0,73      |
| RL23       | 60S ribosomal protein L23                                                  | Rpl23                                     | P62830            | Rpl23     | 15       | 16                         | 11            | 1,45      |
| RL30       | 60S ribosomal protein L30                                                  | Rpl30                                     | P62889            | Rpl30     | 13       | 16                         | 16            | 1,00      |
| RL38       | 60S ribosomal protein L38                                                  | Rpl38                                     | Q9JJI8            | Rpl38     | 8        | 16                         | 8             | 2,00      |
| RS27       | 40S ribosomal protein S27                                                  | Rps27                                     | Q6ZWU9            | Rps27     | 9        | 16                         | 10            | 1,60      |
| HNRPU      | Heterogeneous nuclear ribonucleoprotein U                                  | Hnrnpu Hnrpu                              | Q8VEK3            | Hnrnpu    | 88       | 15                         | 25            | 0,60      |
| AINX       | Alpha-internexin                                                           | Ina                                       | P46660            | Ina       | 56       | 15                         | 0             | only in G |
| RL14       | 60S ribosomal protein L14                                                  | Rpl14                                     | Q9CR57            | Rpl14     | 24       | 15                         | 27            | 0,56      |
| RS21       | 40S ribosomal protein S21                                                  | Rps21                                     | Q9CQR2            | Rps21     | 9        | 15                         | 6             | 2,50      |
| STAU2      | Double-stranded RNA-binding protein Staufen homolog 2                      | Stau2                                     | Q8CJ67            | Stau2     | 63       | 15                         | 14            | 1,07      |
| Q6P5B5     | Fragile X mental retardation, autosomal homolog 2                          | Fxr2 Fxr2h                                | Q6P5B5            | Fxr2      | 74       | 13                         | 10            | 1,30      |
| RL23A      | 60S ribosomal protein L23a                                                 | Rpl23a                                    | P62751            | Rpl23a    | 18       | 13                         | 12            | 1,08      |
| Q6ZWZ4     | 60S ribosomal protein L36                                                  | Rpl36 mCG_20352                           | Q6ZWZ4            | Rpl36     | 12       | 13                         | 14            | 0,93      |
| RL7        | 60S ribosomal protein L7                                                   | Rpl7                                      | P14148            | Rpl7      | 31       | 13                         | 27            | 0,48      |
| RS14       | 40S ribosomal protein S14                                                  | Rps14                                     | P62264            | Rps14     | 16       | 13                         | 11            | 1,18      |
| RS15       | 40S ribosomal protein S15                                                  | Rps15 Rig                                 | P62843            | Rps15     | 17       | 13                         | 12            | 1,08      |
| RS18       | 40S ribosomal protein S18                                                  | Rps18                                     | P62270            | Rps18     | 18       | 13                         | 13            | 1,00      |
| RS3A       | 40S ribosomal protein S3a                                                  | Rps3a Rps3a1                              | P97351            | Rps3a     | 30       | 13                         | 18            | 0,72      |
| TBA1A      | Tubulin alpha-1A chain                                                     | Tuba1a Tuba1                              | P68369            | Tuba1a    | 50       | 13                         | 4             | 3,25      |
| ELAV3      | ELAV (Embryonic lethal, abnormal vision, Drosophila)-like 3 (Hu antigen C) | Elavl3 Huc                                | Q60900            | Elavl3    | 40       | 12                         | 13            | 0,92      |
| Q8VHM5     | Heterogeneous nuclear ribonucleoprotein R                                  | Hnrnpr Hnrpr                              | Q8VHM5            | Hnrnpr    | 71       | 12                         | 14            | 0,86      |

|        |                                                                               |         |        |         |     |    |    |           |
|--------|-------------------------------------------------------------------------------|---------|--------|---------|-----|----|----|-----------|
| ILF3   | Interleukin enhancer-binding factor 3                                         | Ilf3    | Q9Z1X4 | Ilf3    | 96  | 12 | 16 | 0,75      |
| Q99LF8 | Polyadenylate-binding protein, cytoplasmic 4                                  | Pabpc4  | Q99LF8 | Pabpc4  | 72  | 12 | 12 | 1,00      |
| RL17   | 60S ribosomal protein L17                                                     | Rpl17   | Q9CPR4 | Rpl17   | 21  | 12 | 20 | 0,60      |
| RLA1   | 60S acidic ribosomal protein P1                                               | Rplp1   | P47955 | Rplp1   | 11  | 12 | 8  | 1,50      |
| Q642L7 | 40S ribosomal protein S27A                                                    | Rps27a  | Q642L7 | Rps27a  | 18  | 12 | 6  | 2,00      |
| RS6    | 40S ribosomal protein S6                                                      | Rps6    | P62754 | Rps6    | 29  | 12 | 21 | 0,57      |
| RS8    | 40S ribosomal protein S8                                                      | Rps8    | P62242 | Rps8    | 24  | 12 | 34 | 0,35      |
| Q69ZJ3 | S phase cyclin A-associated protein in the ER                                 | Scaper  | Q69ZJ3 | Scaper  | 157 | 12 | 21 | 0,57      |
| HNRPQ  | Heterogeneous nuclear ribonucleoprotein Q                                     | Syncrip | Q77MK9 | Syncrip | 70  | 12 | 15 | 0,80      |
| DHX30  | Putative ATP-dependent RNA helicase DHX30                                     | Dhx30   | Q99PU8 | Dhx30   | 137 | 10 | 22 | 0,45      |
| Q547R0 | Fragile X mental retardation protein FMRP                                     | Fmr1    | Q547R0 | Fmr1    | 66  | 10 | 8  | 1,25      |
| FXR1   | Fragile X mental retardation syndrome-related protein 1                       | Fxr1    | Q61584 | Fxr1    | 76  | 10 | 4  | 2,50      |
| RL13   | 60S ribosomal protein L13                                                     | Rpl13   | P47963 | Rpl13   | 24  | 10 | 16 | 0,63      |
| RL27A  | 60S ribosomal protein L27a                                                    | Rpl27a  | Q9CQ16 | Rpl27a  | 17  | 10 | 14 | 0,71      |
| RL32   | 60S ribosomal protein L32                                                     | Rpl32   | P62911 | Rpl32   | 16  | 10 | 7  | 1,43      |
| RLA2   | 60S acidic ribosomal protein P2                                               | Rplp2   | P99027 | Rplp2   | 12  | 10 | 8  | 1,25      |
| RS13   | 40S ribosomal protein S13                                                     | Rps13   | P62301 | Rps13   | 17  | 10 | 14 | 0,71      |
| RS16   | 40S ribosomal protein S16                                                     | Rps16   | P14131 | Rps16   | 16  | 10 | 21 | 0,48      |
| RS9    | 40S ribosomal protein S9                                                      | Rps9    | Q6ZWN5 | Rps9    | 23  | 10 | 11 | 0,91      |
| VIME   | Vimentin                                                                      | Vim     | P20152 | Vim     | 54  | 10 | 0  | only in G |
| G3BP1  | Ras GTPase-activating protein-binding protein 1                               | G3bp1   | P97855 | G3bp1   | 52  | 9  | 2  | 4,50      |
| Q3UXI9 | Interleukin enhancer-binding factor 2                                         | Ilf2    | Q3UXI9 | Ilf2    | 43  | 9  | 10 | 0,90      |
| Q5XJF6 | Ribosomal protein L1                                                          | Rpl10a  | Q5XJF6 | Rpl10a  | 25  | 9  | 12 | 0,75      |
| RL18   | 60S ribosomal protein L18                                                     | Rpl18   | P35980 | Rpl18   | 22  | 9  | 19 | 0,47      |
| RL21   | 60S ribosomal protein L21                                                     | Rpl21   | O09167 | Rpl21   | 19  | 9  | 12 | 0,75      |
| RL8    | 60S ribosomal protein L8                                                      | Rpl8    | P62918 | Rpl8    | 28  | 9  | 9  | 1,00      |
| RL9    | 60S ribosomal protein L9                                                      | Rpl9    | P51410 | Rpl9    | 22  | 9  | 14 | 0,64      |
| RS10   | 40S ribosomal protein S10                                                     | Rps10   | P63325 | Rps10   | 19  | 9  | 7  | 1,29      |
| RS11   | 40S ribosomal protein S11                                                     | Rps11   | P62281 | Rps11   | 18  | 9  | 11 | 0,82      |
| RS2    | 40S ribosomal protein S2                                                      | Rps2    | P25444 | Rps2    | 31  | 9  | 18 | 0,50      |
| RS20   | 40S ribosomal protein S20                                                     | Rps20   | P60867 | Rps20   | 13  | 9  | 11 | 0,82      |
| RS24   | 40S ribosomal protein S24                                                     | Rps24   | P62849 | Rps24   | 15  | 9  | 16 | 0,56      |
| RS28   | 40S ribosomal protein S28                                                     | Rps28   | P62858 | Rps28   | 8   | 9  | 2  | 4,50      |
| RS7    | 40S ribosomal protein S7                                                      | Rps7    | P62082 | Rps7    | 22  | 9  | 15 | 0,60      |
| Q9DBE7 | Double-stranded RNA-binding protein Staufen homolog 1                         | Stau1   | Q9DBE7 | Stau1   | 54  | 9  | 10 | 0,90      |
| RS30   | 40S ribosomal protein S30                                                     | Fau     | P62862 | Rps30   | 7   | 7  | 4  | 1,75      |
| PRKRA  | Interferon-inducible double stranded RNA-dependent protein kinase activator A | Prkra   | Q9WTX2 | Prkra   | 34  | 7  | 8  | 0,88      |
| RN214  | RING finger protein 214                                                       | Rnf214  | Q8BFU3 | Rnf214  | 74  | 7  | 3  | 2,33      |
| RL13A  | 60S ribosomal protein L13a                                                    | Rpl13a  | P19253 | Rpl13a  | 23  | 7  | 14 | 0,50      |
| RS19   | 40S ribosomal protein S19                                                     | Rps19   | Q9CZX8 | Rps19   | 16  | 7  | 10 | 0,70      |
| RS23   | 40S ribosomal protein S23                                                     | Rps23   | P62267 | Rps23   | 16  | 7  | 11 | 0,64      |
| RS25   | 40S ribosomal protein S25                                                     | Rps25   | P62852 | Rps25   | 14  | 7  | 10 | 0,70      |
| Q91V55 | 40S ribosomal protein S5                                                      | Rps5    | Q91V55 | Rps5    | 23  | 7  | 12 | 0,58      |
| EIF3B  | Eukaryotic translation initiation factor 3 subunit B                          | Eif3b   | Q8JZQ9 | Eif3b   | 91  | 6  | 4  | 1,50      |
| NFL    | Neurofilament light polypeptide                                               | Nefl    | P08551 | Nefl    | 62  | 6  | 0  | only in G |
| PURA   | Transcriptional activator protein Pur-alpha                                   | Pura    | P42669 | Pura    | 35  | 6  | 11 | 0,55      |
| RL11   | 60S ribosomal protein L11                                                     | Rpl11   | Q9CXW4 | Rpl11   | 20  | 6  | 9  | 0,67      |
| RL22   | 60S ribosomal protein L22                                                     | Rpl22   | P67984 | Rpl22   | 15  | 6  | 6  | 1,00      |

|               |                                                                    |                |        |                |     |   |    |           |
|---------------|--------------------------------------------------------------------|----------------|--------|----------------|-----|---|----|-----------|
| <b>RL24</b>   | 60S ribosomal protein L24                                          | <b>Rpl24</b>   | Q8BP67 | <b>Rpl24</b>   | 18  | 6 | 17 | 0,35      |
| <b>RL26</b>   | 60S ribosomal protein L26                                          | <b>Rpl26</b>   | P61255 | <b>Rpl26</b>   | 17  | 6 | 5  | 1,20      |
| <b>RL31</b>   | 60S ribosomal protein L31                                          | <b>Rpl31</b>   | P62900 | <b>Rpl31</b>   | 14  | 6 | 11 | 0,55      |
| <b>RL35</b>   | 60S ribosomal protein L35                                          | <b>Rpl35</b>   | Q62WV7 | <b>Rpl35</b>   | 15  | 6 | 5  | 1,20      |
| <b>Q6ZWZ6</b> | 40S ribosomal protein S12                                          | <b>Rps12</b>   | Q6ZWZ6 | <b>Rps12</b>   | 15  | 6 | 5  | 1,20      |
| <b>RS15A</b>  | 40S ribosomal protein S15a                                         | <b>Rps15a</b>  | P62245 | <b>Rps15a</b>  | 15  | 6 | 10 | 0,60      |
| <b>RS17</b>   | 40S ribosomal protein S17                                          | <b>Rps17</b>   | P63276 | <b>Rps17</b>   | 16  | 6 | 12 | 0,50      |
| <b>PAIRB</b>  | Plasminogen activator inhibitor 1 RNA-binding protein              | <b>Serbp1</b>  | Q9CY58 | <b>Serbp1</b>  | 45  | 6 | 7  | 0,86      |
| <b>ACTN1</b>  | Alpha-actinin-1                                                    | <b>Actn1</b>   | Q7TPR4 | <b>Actn1</b>   | 103 | 4 | 0  | only in G |
| <b>DREB</b>   | Drebrin                                                            | <b>Dbn1</b>    | Q9QXS6 | <b>Dbn1</b>    | 77  | 4 | 0  | only in G |
| <b>HNRPC</b>  | Heterogeneous nuclear ribonucleoproteins C1/C2                     | <b>Hnrnpc</b>  | Q9Z204 | <b>Hnrnpc</b>  | 34  | 4 | 8  | 0,50      |
| <b>NPM</b>    | Nucleophosmin                                                      | <b>Npm1</b>    | Q61937 | <b>Npm1</b>    | 33  | 4 | 9  | 0,44      |
| <b>RL15</b>   | 60S ribosomal protein L15                                          | <b>Rpl15</b>   | Q9CZM2 | <b>Rpl15</b>   | 24  | 4 | 5  | 0,80      |
| <b>RL27</b>   | 60S ribosomal protein L27                                          | <b>Rpl27</b>   | P61358 | <b>Rpl27</b>   | 16  | 4 | 8  | 0,50      |
| <b>SRPK1</b>  | Serine/threonine-protein kinase SRPK1                              | <b>Srpk1</b>   | O70551 | <b>Srpk1</b>   | 73  | 4 | 6  | 0,67      |
| <b>UBP10</b>  | Ubiquitin carboxyl-terminal hydrolase 10                           | <b>Usp10</b>   | P52479 | <b>Usp10</b>   | 87  | 4 | 8  | 0,50      |
| <b>DYST</b>   | Dystonin                                                           | <b>Dst</b>     | Q91ZU6 | <b>Dst</b>     | 834 | 3 | 0  | only in G |
| <b>MA7D1</b>  | MAP7 domain-containing protein 1                                   | <b>Map7d1</b>  | A2AJI0 | <b>Map7d1</b>  | 93  | 3 | 4  | 0,75      |
| <b>ML12B</b>  | Myosin regulatory light chain 12B                                  | <b>Myl12b</b>  | Q3THE2 | <b>Myl12b</b>  | 20  | 3 | 0  | only in G |
| <b>MYL6</b>   | Myosin light polypeptide 6                                         | <b>Myl6</b>    | Q60605 | <b>Myl6</b>    | 17  | 3 | 0  | only in G |
| <b>NFM</b>    | Neurofilament medium polypeptide                                   | <b>Nefm</b>    | P08553 | <b>Nefm</b>    | 96  | 3 | 0  | only in G |
| <b>PRPF19</b> | Pre-mRNA-processing factor 19                                      | <b>Prpf19</b>  | Q99KP6 | <b>Prpf19</b>  | 55  | 3 | 2  | 1,50      |
| <b>PURB</b>   | Transcriptional activator protein Pur-beta                         | <b>Purb</b>    | O35295 | <b>Purb</b>    | 34  | 3 | 11 | 0,27      |
| <b>RL19</b>   | 60S ribosomal protein L19                                          | <b>Rpl19</b>   | P84099 | <b>Rpl19</b>   | 23  | 3 | 0  | only in G |
| <b>RL35A</b>  | 60S ribosomal protein L35a                                         | <b>Rpl35a</b>  | O55142 | <b>Rpl35a</b>  | 13  | 3 | 2  | 1,50      |
| <b>RS26</b>   | 40S ribosomal protein S26                                          | <b>Rps26</b>   | P62855 | <b>Rps26</b>   | 13  | 3 | 12 | 0,25      |
| <b>LA</b>     | Lupus La protein homolog                                           | <b>Ssb</b>     | P32067 | <b>Ssb</b>     | 48  | 3 | 3  | 1,00      |
| <b>UBP2L</b>  | Ubiquitin-associated protein 2-like                                | <b>Ubp2l</b>   | Q80X50 | <b>Ubp2l</b>   | 117 | 3 | 0  | only in G |
| <b>1433Z</b>  | 14-3-3 protein zeta/delta                                          | <b>Ywhaz</b>   | P63101 | <b>Ywhaz</b>   | 28  | 3 | 0  | only in G |
| <b>EIF3C</b>  | Eukaryotic translation initiation factor 3 subunit C               | <b>Eif3c</b>   | Q8R1B4 | <b>Eif3c</b>   | 106 | 1 | 2  | 0,50      |
| <b>HNRPM</b>  | Heterogeneous nuclear ribonucleoprotein M                          | <b>Hnrnpm</b>  | Q9D0E1 | <b>Hnrnpm</b>  | 78  | 1 | 2  | 0,50      |
| <b>RL18A</b>  | 60S ribosomal protein L18a                                         | <b>Rpl18a</b>  | P62717 | <b>Rpl18a</b>  | 21  | 1 | 8  | 0,13      |
| <b>RL34</b>   | 60S ribosomal protein L34                                          | <b>Rpl34</b>   | Q9D1R9 | <b>Rpl34</b>   | 13  | 1 | 0  | only in G |
| <b>RS29</b>   | 40S ribosomal protein S29                                          | <b>Rps29</b>   | P62274 | <b>Rps29</b>   | 7   | 1 | 2  | 0,50      |
| <b>AGAP2</b>  | Arf-GAP with GTPase, ANK repeat and PH domain-containing protein 2 | <b>Agap2</b>   | Q3UHD9 | <b>Agap2</b>   | 125 | 0 | 3  | only in P |
| <b>ARHG2</b>  | Rho guanine nucleotide exchange factor 2                           | <b>Arhgef2</b> | Q60875 | <b>Arhgef2</b> | 112 | 0 | 3  | only in P |
| <b>ATX2L</b>  | Ataxin-2-like protein                                              | <b>Atxn2l</b>  | Q7TQH0 | <b>Atxn2l</b>  | 111 | 0 | 2  | only in P |
| <b>SPF27</b>  | Pre-mRNA-splicing factor SPF27                                     | <b>Bcas2</b>   | Q9D287 | <b>Bcas2</b>   | 26  | 0 | 2  | only in P |
| <b>CDC5L</b>  | Cell division cycle 5-like protein                                 | <b>Cdc5l</b>   | Q6A068 | <b>Cdc5l</b>   | 92  | 0 | 7  | only in P |
| <b>CKAP4</b>  | Cytoskeleton-associated protein 4                                  | <b>Ckap4</b>   | Q8BMK4 | <b>Ckap4</b>   | 64  | 0 | 2  | only in P |
| <b>YBOX3</b>  | Y-box-binding protein 3                                            | <b>Ybx3</b>    | Q9JKB3 | <b>Csda</b>    | 39  | 0 | 11 | only in P |
| <b>DHX29</b>  | ATP-dependent RNA helicase DHX29                                   | <b>Dhx29</b>   | Q6PGC1 | <b>Dhx29</b>   | 154 | 0 | 2  | only in P |
| <b>DHX36</b>  | ATP-dependent RNA helicase DHX36                                   | <b>Dhx36</b>   | Q8VHK9 | <b>Dhx36</b>   | 114 | 0 | 8  | only in P |
| <b>DHX9</b>   | ATP-dependent RNA helicase A                                       | <b>Dhx9</b>    | O70133 | <b>Dhx9</b>    | 149 | 0 | 8  | only in P |
| <b>EIF3A</b>  | Eukaryotic translation initiation factor 3 subunit A               | <b>Eif3a</b>   | P23116 | <b>Eif3a</b>   | 162 | 0 | 13 | only in P |
| <b>EIF3L</b>  | Eukaryotic translation initiation factor 3 subunit L               | <b>Eif3l</b>   | Q8QZY1 | <b>Eif3l</b>   | 67  | 0 | 2  | only in P |
| <b>F120A</b>  | Constitutive coactivator of PPAR-gamma-like protein 1              | <b>FAM120A</b> | Q6A0A9 | <b>FAM120A</b> | 122 | 0 | 8  | only in P |
| <b>F120C</b>  | Constitutive coactivator of PPAR-gamma-like protein 2              | <b>Fam120c</b> | Q8C3F2 | <b>Fam120c</b> | 120 | 0 | 6  | only in P |

|               |                                                                |                                            |        |                |     |   |   |           |
|---------------|----------------------------------------------------------------|--------------------------------------------|--------|----------------|-----|---|---|-----------|
| <b>Q8K2R0</b> | Farp1 protein                                                  | <b>Farp1</b>                               | Q8K2R0 | <b>Farp1</b>   | 95  | 0 | 2 | only in P |
| <b>HNRH1</b>  | Heterogeneous nuclear ribonucleoprotein H                      | <b>Hnrnph1</b> Hnrph,Hnrph1                | Q35737 | <b>Hnrnph1</b> | 49  | 0 | 4 | only in P |
| <b>HNRPK</b>  | Heterogeneous nuclear ribonucleoprotein K                      | <b>Hnrnpk</b> Hnrpk                        | P61979 | <b>Hnrnpk</b>  | 51  | 0 | 4 | only in P |
| <b>LARP1</b>  | La-related protein 1                                           | <b>Larp1</b> Kiaa0731,Larp                 | Q6ZQ58 | <b>Larp1</b>   | 121 | 0 | 2 | only in P |
| <b>LARP4</b>  | La-related protein 4                                           | <b>Larp4</b>                               | Q8BWW4 | <b>Larp4</b>   | 80  | 0 | 2 | only in P |
| <b>LAR4B</b>  | La-related protein 4B                                          | <b>Larp4b</b> D13Wsu64e,Kiaa0217,Larp5     | Q6A0A2 | <b>Larp4b</b>  | 82  | 0 | 9 | only in P |
| <b>LAS1L</b>  | Ribosomal biogenesis protein LAS1L                             | <b>Las1l</b>                               | A2BE28 | <b>Las1l</b>   | 89  | 0 | 3 | only in P |
| <b>MATR3</b>  | Matrin-3                                                       | <b>Matr3</b>                               | Q8K310 | <b>Matr3</b>   | 95  | 0 | 4 | only in P |
| <b>NCBP1</b>  | Nuclear cap-binding protein subunit 1                          | <b>Ncbp1</b> Cbp80                         | Q3UYV9 | <b>Ncbp1</b>   | 92  | 0 | 2 | only in P |
| <b>NUCL</b>   | Nucleolin                                                      | <b>Ncl</b> Nuc                             | P09405 | <b>Ncl</b>     | 77  | 0 | 4 | only in P |
| <b>NOL9</b>   | Polynucleotide 5'-hydroxyl-kinase nucleolar protein 9          | <b>Nol9</b>                                | Q3TZX8 | <b>Nol9</b>    | 81  | 0 | 2 | only in P |
| <b>NUFP2</b>  | Nuclear fragile X mental retardation-interacting protein 2     | <b>Nufip2</b> Kiaa1321                     | Q5F2E7 | <b>Nufip2</b>  | 76  | 0 | 6 | only in P |
| <b>PRC2A</b>  | Large proline-rich protein BAT2                                | <b>Prcc2a</b> Bat2                         | Q7TSC1 | <b>Prcc2a</b>  | 229 | 0 | 5 | only in P |
| <b>PRC2C</b>  | BAT2 domain-containing protein 1                               | <b>Prcc2c</b> Bat2d,Bat2d1,Bat2l2,Kiaa1096 | Q3TLH4 | <b>Prcc2c</b>  | 309 | 0 | 6 | only in P |
| <b>PURG</b>   | Purine-rich element-binding protein gamma                      | <b>Purg</b>                                | Q8R4E6 | <b>Purg</b>    | 40  | 0 | 6 | only in P |
| <b>RBMX</b>   | Heterogeneous nuclear ribonucleoprotein G                      | <b>Rbmx</b> Hnrnpg,Hnrpg,Rbmxp1,Rbmxrt     | Q9R0Y0 | <b>Rbmx</b>    | 31  | 0 | 4 | only in P |
| <b>RL28</b>   | 60S ribosomal protein L28                                      | <b>Rpl28</b>                               | P41105 | <b>Rpl28</b>   | 16  | 0 | 1 | only in P |
| <b>RL37A</b>  | 60S ribosomal protein L37a                                     | <b>Rpl37a</b>                              | P61514 | <b>Rpl37a</b>  | 10  | 0 | 2 | only in P |
| <b>RRBP1</b>  | Ribosome-binding protein 1                                     | <b>Rrbp1</b>                               | Q99PL5 | <b>Rrbp1</b>   | 173 | 0 | 3 | only in P |
| <b>SUGP2</b>  | Putative splicing factor, arginine/serine-rich 14              | <b>Sugp2</b> Sfrs14,Srsf14                 | Q8CH09 | <b>Sfrs14</b>  | 118 | 0 | 2 | only in P |
| <b>SPAS2</b>  | Spermatogenesis-associated serine-rich protein 2               | <b>Spats2</b> Scr59                        | Q8K1N4 | <b>Spats2</b>  | 59  | 0 | 2 | only in P |
| <b>SPS2L</b>  | SPATS2-like protein                                            | <b>Spats2l</b>                             | Q91WJ7 | <b>Spats2l</b> | 62  | 0 | 3 | only in P |
| <b>STRBP</b>  | Spermatid perinuclear RNA-binding protein                      | <b>Strbp</b> Spnr                          | Q91WM1 | <b>Strbp</b>   | 74  | 0 | 4 | only in P |
| <b>TEX10</b>  | Testis-expressed sequence 10 protein                           | <b>Tex10</b>                               | Q3URQ0 | <b>Tex10</b>   | 105 | 0 | 2 | only in P |
| <b>THOC4</b>  | THO complex subunit 4                                          | <b>Alyref</b> Aly,Ref1,Refbp1,THOC4        | O08583 | <b>Thoc4</b>   | 27  | 0 | 2 | only in P |
| <b>TTC3</b>   | E3 ubiquitin-protein ligase, tetratricopeptide repeat domain 3 | <b>Ttc3</b> Kiaa4119                       | O88196 | <b>Ttc3</b>    | 224 | 0 | 2 | only in P |
| <b>WDR18</b>  | WD repeat-containing protein 18                                | <b>Wdr18</b>                               | Q4VBE8 | <b>Wdr18</b>   | 47  | 0 | 2 | only in P |
| <b>A2A7S7</b> | Tyrosyl-tRNA synthetase                                        | <b>Yars</b> mCG_141662                     | A2A7S7 | <b>Yars</b>    | 63  | 0 | 6 | only in P |
| <b>ZFR</b>    | Zinc finger RNA-binding protein                                | <b>Zfr</b>                                 | O88532 | <b>Zfr</b>     | 117 | 0 | 4 | only in P |

|                                                                         |              |              |
|-------------------------------------------------------------------------|--------------|--------------|
| <b>Total proteins detected</b>                                          | <b>128</b>   | <b>155</b>   |
| <b>Total normalized spectrum counts</b>                                 | <b>1579</b>  | <b>1789</b>  |
| <b>Ribosomal proteins normalized spectrum counts</b>                    | <b>765</b>   | <b>1011</b>  |
| <b>% normalized spectrum counts corresponding to ribosomal proteins</b> | <b>48,4%</b> | <b>56,5%</b> |
