# Supplementary material for: Tracking the Fragile X Mental Retardation Protein in a Highly Ordered Neuronal RiboNucleoParticles Population: A Link between Stalled Polyribosomes and RNA Granules
Source: PubMed Central journal article supplement (PMC4963131; doi:10.1371/journal.pgen.1006192), 2016-07-27
Supplement: pgen.1006192.s007.pdf [file pgen.1006192.s007.pdf]

| GOTERM category                                         | Term                                                         | PValue                                        | Fold Enrichment | Bonferroni | Benjamini | FDR       |           |
|---------------------------------------------------------|--------------------------------------------------------------|-----------------------------------------------|-----------------|------------|-----------|-----------|-----------|
| Biological Process                                      | GO:0006414~translational elongation                          | 4,13E-131                                     | 81,28           | 2,67E-128  | 2,67E-128 | 6,16E-128 |           |
|                                                         | GO:0006412~translation                                       | 2,87E-90                                      | 25,85           | 1,85E-87   | 9,26E-88  | 4,28E-87  |           |
|                                                         | GO:0042274~ribosomal small subunit biogenesis                | 9,90E-18                                      | 105,11          | 6,39E-15   | 2,13E-15  | 1,48E-14  |           |
|                                                         | GO:0042254~ribosome biogenesis                               | 1,11E-17                                      | 18,01           | 7,15E-15   | 1,79E-15  | 1,65E-14  |           |
|                                                         | GO:0006396~RNA processing                                    | 1,07E-14                                      | 6,13            | 6,89E-12   | 1,38E-12  | 1,59E-11  |           |
|                                                         | GO:0022613~ribonucleoprotein complex biogenesis              | 1,31E-14                                      | 12,20           | 8,46E-12   | 1,41E-12  | 1,95E-11  |           |
|                                                         | GO:0006364~rRNA processing                                   | 3,74E-14                                      | 18,85           | 2,42E-11   | 3,45E-12  | 5,58E-11  |           |
|                                                         | GO:0016072~rRNA metabolic process                            | 6,92E-14                                      | 18,07           | 4,47E-11   | 5,59E-12  | 1,03E-10  |           |
|                                                         | GO:0042273~ribosomal large subunit biogenesis                | 3,33E-13                                      | 92,50           | 2,15E-10   | 2,39E-11  | 4,98E-10  |           |
|                                                         | GO:0034470~ncRNA processing                                  | 5,95E-11                                      | 9,89            | 3,85E-08   | 3,85E-09  | 8,88E-08  |           |
|                                                         | GO:0034660~ncRNA metabolic process                           | 1,09E-09                                      | 8,04            | 7,06E-07   | 6,42E-08  | 1,63E-06  |           |
|                                                         | GO:0043488~regulation of mRNA stability                      | 3,33E-05                                      | 26,28           | 2,13E-02   | 1,79E-03  | 4,97E-02  |           |
|                                                         | GO:0045103~intermediate filament-based process               | 3,33E-05                                      | 26,28           | 2,13E-02   | 1,79E-03  | 4,97E-02  |           |
|                                                         | GO:0006413~translational initiation                          | 3,95E-05                                      | 15,42           | 2,52E-02   | 1,96E-03  | 5,89E-02  |           |
|                                                         | GO:0043487~regulation of RNA stability                       | 4,78E-05                                      | 24,09           | 3,04E-02   | 2,20E-03  | 7,12E-02  |           |
|                                                         | GO:0042255~ribosome assembly                                 | 7,06E-05                                      | 46,25           | 4,46E-02   | 3,03E-03  | 1,05E-01  |           |
|                                                         | GO:0016071~mRNA metabolic process                            | 7,81E-05                                      | 4,06            | 4,92E-02   | 3,15E-03  | 1,16E-01  |           |
|                                                         | GO:0030705~cytoskeleton-dependent intracellular transport    | 8,01E-05                                      | 13,34           | 5,04E-02   | 3,04E-03  | 1,19E-01  |           |
|                                                         | GO:0010608~posttranscriptional regulation of gene expression | 8,30E-05                                      | 5,48            | 5,22E-02   | 2,98E-03  | 1,24E-01  |           |
|                                                         | GO:0042257~ribosomal subunit assembly                        | 2,17E-04                                      | 115,62          | 1,31E-01   | 7,37E-03  | 3,24E-01  |           |
|                                                         | GO:0043489~RNA stabilization                                 | 2,59E-04                                      | 30,83           | 1,54E-01   | 8,34E-03  | 3,86E-01  |           |
|                                                         | GO:0048255~mRNA stabilization                                | 2,59E-04                                      | 30,83           | 1,54E-01   | 8,34E-03  | 3,86E-01  |           |
|                                                         | GO:0045104~intermediate filament cytoskeleton organization   | 6,30E-04                                      | 23,12           | 3,34E-01   | 1,92E-02  | 9,35E-01  |           |
|                                                         | GO:0033119~negative regulation of RNA splicing               | 7,17E-04                                      | 69,37           | 3,71E-01   | 2,08E-02  | 1,06E+00  |           |
|                                                         | GO:0006397~mRNA processing                                   | 1,76E-03                                      | 3,60            | 6,79E-01   | 4,83E-02  | 2,59E+00  |           |
|                                                         | Cellular Component                                           | GO:0022626~cytosolic ribosome                 | 5,46E-117       | 82,85      | 9,17E-115 | 9,17E-115 | 6,64E-114 |
|                                                         |                                                              | GO:0005840~ribosome                           | 4,72E-103       | 36,66      | 7,93E-101 | 3,97E-101 | 5,75E-100 |
|                                                         |                                                              | GO:0033279~ribosomal subunit                  | 1,40E-102       | 54,09      | 2,36E-100 | 7,86E-101 | 1,71E-99  |
|                                                         |                                                              | GO:0030529~ribonucleoprotein complex          | 1,40E-100       | 18,61      | 2,36E-98  | 5,89E-99  | 1,71E-97  |
|                                                         |                                                              | GO:0044445~cytosolic part                     | 4,75E-94        | 44,85      | 7,98E-92  | 1,60E-92  | 5,78E-91  |
|                                                         |                                                              | GO:0022627~cytosolic small ribosomal subunit  | 3,97E-87        | 85,21      | 6,67E-85  | 1,11E-85  | 4,84E-84  |
|                                                         |                                                              | GO:0005829~cytosol                            | 1,11E-85        | 6,81       | 1,86E-83  | 2,66E-84  | 1,35E-82  |
|                                                         |                                                              | GO:0022625~cytosolic large ribosomal subunit  | 4,80E-83        | 84,09      | 8,06E-81  | 1,01E-81  | 5,84E-80  |
| GO:0043232~intracellular non-membrane-bounded organelle |                                                              | 4,43E-82                                      | 4,19            | 7,43E-80   | 8,26E-81  | 5,39E-79  |           |
| GO:0043228~non-membrane-bounded organelle               |                                                              | 4,43E-82                                      | 4,19            | 7,43E-80   | 8,26E-81  | 5,39E-79  |           |
| GO:0015935~small ribosomal subunit                      |                                                              | 7,90E-80                                      | 55,79           | 1,33E-77   | 1,33E-78  | 9,62E-77  |           |
| GO:0015934~large ribosomal subunit                      |                                                              | 1,13E-48                                      | 52,46           | 1,89E-46   | 1,72E-47  | 1,37E-45  |           |
| GO:0005730~nucleolus                                    |                                                              | 4,45E-09                                      | 3,97            | 7,47E-07   | 6,23E-08  | 5,42E-06  |           |
| GO:0031981~nuclear lumen                                |                                                              | 1,74E-05                                      | 2,28            | 2,93E-03   | 2,25E-04  | 2,12E-02  |           |
| GO:0060053~neurofilament cytoskeleton                   |                                                              | 9,00E-05                                      | 42,61           | 1,50E-02   | 1,08E-03  | 1,10E-01  |           |
| GO:0070013~intracellular organelle lumen                |                                                              | 1,36E-04                                      | 1,98            | 2,26E-02   | 1,52E-03  | 1,65E-01  |           |
| GO:0043233~organelle lumen                              |                                                              | 2,08E-04                                      | 1,93            | 3,44E-02   | 2,19E-03  | 2,53E-01  |           |
| GO:0031974~membrane-enclosed lumen                      |                                                              | 2,99E-04                                      | 1,89            | 4,90E-02   | 2,95E-03  | 3,64E-01  |           |
| GO:0005844~polysome                                     |                                                              | 5,80E-04                                      | 23,67           | 9,28E-02   | 5,40E-03  | 7,04E-01  |           |
| GO:0005883~neurofilament                                |                                                              | 1,26E-03                                      | 53,26           | 1,91E-01   | 1,11E-02  | 1,52E+00  |           |
| GO:0005681~spliceosome                                  |                                                              | 1,45E-03                                      | 5,65            | 2,16E-01   | 1,21E-02  | 1,75E+00  |           |
| Molecular Function                                      |                                                              | GO:0003735~structural constituent of ribosome | 1,58E-100       | 43,00      | 2,36E-98  | 2,36E-98  | 1,89E-97  |
|                                                         |                                                              | GO:0005198~structural molecule activity       | 1,50E-73        | 13,21      | 2,23E-71  | 1,11E-71  | 1,78E-70  |
|                                                         | GO:0003723~RNA binding                                       | 4,13E-66                                      | 11,37           | 6,15E-64   | 2,05E-64  | 4,93E-63  |           |
|                                                         | GO:0003729~mRNA binding                                      | 8,66E-19                                      | 26,97           | 1,29E-16   | 3,23E-17  | 1,03E-15  |           |
|                                                         | GO:0019843~rRNA binding                                      | 3,90E-12                                      | 36,10           | 5,82E-10   | 1,16E-10  | 4,66E-09  |           |
|                                                         | GO:0003725~double-stranded RNA binding                       | 2,54E-04                                      | 15,86           | 3,71E-02   | 6,28E-03  | 3,02E-01  |           |
|                                                         | GO:0005200~structural constituent of cytoskeleton            | 6,72E-04                                      | 8,49            | 9,54E-02   | 1,42E-02  | 7,99E-01  |           |
|                                                         | GO:0008143~poly(A) RNA binding                               | 2,40E-03                                      | 39,26           | 3,01E-01   | 4,38E-02  | 2,83E+00  |           |
|                                                         | GO:0045182~translation regulator activity                    | 2,53E-03                                      | 14,44           | 3,15E-01   | 4,11E-02  | 2,98E+00  |           |
|                                                         | GO:0070717~poly-purine tract binding                         | 3,07E-03                                      | 34,90           | 3,67E-01   | 4,48E-02  | 3,60E+00  |           |
