# Supplementary material for: Tracking the Fragile X Mental Retardation Protein in a Highly Ordered Neuronal RiboNucleoParticles Population: A Link between Stalled Polyribosomes and RNA Granules
Source: PubMed Central journal article supplement (PMC4963131; doi:10.1371/journal.pgen.1006192), 2016-07-27
Supplement: pgen.1006192.s008.pdf [file pgen.1006192.s008.pdf]

| GOTERM category                                               | Term                                                                                            | PValue                               | Fold Enrichment |
|---------------------------------------------------------------|-------------------------------------------------------------------------------------------------|--------------------------------------|-----------------|
| Biological process                                            | GO:0006414~translational elongation                                                             | 9,73E-128                            | 75,47           |
|                                                               | GO:0006412~translation                                                                          | 3,44E-96                             | 25,62           |
|                                                               | GO:0006396~RNA processing                                                                       | 2,09E-22                             | 7,46            |
|                                                               | GO:0042274~ribosomal small subunit biogenesis                                                   | 1,98E-17                             | 97,60           |
|                                                               | GO:0042254~ribosome biogenesis                                                                  | 4,40E-17                             | 16,72           |
|                                                               | GO:0022613~ribonucleoprotein complex biogenesis                                                 | 2,09E-16                             | 12,53           |
|                                                               | GO:0006364~rRNA processing                                                                      | 1,08E-13                             | 17,51           |
|                                                               | GO:0016072~rRNA metabolic process                                                               | 1,99E-13                             | 16,78           |
|                                                               | GO:0042273~ribosomal large subunit biogenesis                                                   | 5,69E-13                             | 85,89           |
|                                                               | GO:0016071~mRNA metabolic process                                                               | 2,27E-11                             | 6,38            |
|                                                               | GO:0034470~ncRNA processing                                                                     | 1,76E-10                             | 9,19            |
|                                                               | GO:0034660~ncRNA metabolic process                                                              | 3,49E-10                             | 7,94            |
|                                                               | GO:0006397~mRNA processing                                                                      | 8,52E-10                             | 6,35            |
|                                                               | GO:0008380~RNA splicing                                                                         | 9,67E-10                             | 6,80            |
|                                                               | GO:0006413~translational initiation                                                             | 1,65E-07                             | 19,09           |
|                                                               | GO:0043488~regulation of mRNA stability                                                         | 1,44E-06                             | 29,28           |
|                                                               | GO:0000377~RNA splicing, via transesterification reactions with bulged adenosine as nucleophile | 1,49E-06                             | 7,72            |
|                                                               | GO:0000375~RNA splicing, via transesterification reactions                                      | 1,49E-06                             | 7,72            |
|                                                               | GO:0000398~nuclear mRNA splicing, via spliceosome                                               | 1,49E-06                             | 7,72            |
|                                                               | GO:0043487~regulation of RNA stability                                                          | 2,30E-06                             | 26,84           |
|                                                               | GO:0010608~posttranscriptional regulation of gene expression                                    | 4,01E-06                             | 6,11            |
|                                                               | GO:0043489~RNA stabilization                                                                    | 8,76E-06                             | 35,79           |
|                                                               | GO:0048255~mRNA stabilization                                                                   | 8,76E-06                             | 35,79           |
|                                                               | GO:0042255~ribosome assembly                                                                    | 8,81E-05                             | 42,95           |
|                                                               | GO:0042257~ribosomal subunit assembly                                                           | 2,53E-04                             | 107,37          |
|                                                               | GO:0006403~RNA localization                                                                     | 3,24E-04                             | 7,52            |
|                                                               | GO:0022618~ribonucleoprotein complex assembly                                                   | 4,35E-04                             | 9,34            |
|                                                               | GO:0033119~negative regulation of RNA splicing                                                  | 8,32E-04                             | 64,42           |
|                                                               | GO:0050657~nucleic acid transport                                                               | 2,03E-03                             | 6,64            |
|                                                               | GO:0051236~establishment of RNA localization                                                    | 2,03E-03                             | 6,64            |
|                                                               | GO:0050658~RNA transport                                                                        | 2,03E-03                             | 6,64            |
|                                                               | GO:0051168~nuclear export                                                                       | 2,27E-03                             | 8,95            |
|                                                               | Cellular component                                                                              | GO:0030529~ribonucleoprotein complex | 1,12E-115       |
| GO:0022626~cytosolic ribosome                                 |                                                                                                 | 3,69E-110                            | 73,01           |
| GO:0005840~ribosome                                           |                                                                                                 | 5,80E-102                            | 33,72           |
| GO:0033279~ribosomal subunit                                  |                                                                                                 | 4,58E-96                             | 47,69           |
| GO:0044445~cytosolic part                                     |                                                                                                 | 1,14E-83                             | 38,28           |
| GO:0022627~cytosolic small ribosomal subunit                  |                                                                                                 | 2,02E-55                             | 76,31           |
| GO:0022625~cytosolic large ribosomal subunit                  |                                                                                                 | 6,39E-49                             | 72,80           |
| GO:0005829~cytosol                                            |                                                                                                 | 1,81E-48                             | 6,02            |
| GO:0043228~non-membrane-bounded organelle                     |                                                                                                 | 3,63E-48                             | 3,89            |
| GO:0043232~intracellular non-membrane-bounded organelle       |                                                                                                 | 3,63E-48                             | 3,89            |
| GO:0015935~small ribosomal subunit                            |                                                                                                 | 4,56E-48                             | 49,97           |
| GO:0015934~large ribosomal subunit                            |                                                                                                 | 7,10E-45                             | 45,56           |
| GO:0005730~nucleolus                                          |                                                                                                 | 1,69E-14                             | 4,78            |
| GO:0031981~nuclear lumen                                      |                                                                                                 | 2,81E-10                             | 2,83            |
| GO:0005681~spliceosome                                        |                                                                                                 | 1,18E-08                             | 9,39            |
| GO:0070013~intracellular organelle lumen                      |                                                                                                 | 4,18E-08                             | 2,36            |
| GO:0043233~organelle lumen                                    |                                                                                                 | 8,15E-08                             | 2,31            |
| GO:0031974~membrane-enclosed lumen                            |                                                                                                 | 1,44E-07                             | 2,26            |
| GO:0030530~heterogeneous nuclear ribonucleoprotein complex    |                                                                                                 | 2,40E-05                             | 28,06           |
| GO:0005844~polysome                                           |                                                                                                 | 3,06E-05                             | 26,50           |
| GO:0005852~eukaryotic translation initiation factor 3 complex | 4,57E-04                                                                                        | 25,44                                |                 |
| GO:0042788~polysomal ribosome                                 | 6,36E-04                                                                                        | 71,54                                |                 |
| Molecular function                                            | GO:0003735~structural constituent of ribosome                                                   | 1,65E-95                             | 38,09           |
|                                                               | GO:0003723~RNA binding                                                                          | 1,25E-85                             | 12,27           |
|                                                               | GO:0005198~structural molecule activity                                                         | 1,04E-61                             | 11,12           |
|                                                               | GO:0003729~mRNA binding                                                                         | 6,51E-18                             | 23,89           |
|                                                               | GO:0019843~rRNA binding                                                                         | 1,19E-11                             | 31,98           |
|                                                               | GO:0003725~double-stranded RNA binding                                                          | 1,18E-06                             | 19,67           |
|                                                               | GO:0003727~single-stranded RNA binding                                                          | 1,82E-04                             | 17,17           |
|                                                               | GO:0008143~poly(A) RNA binding                                                                  | 3,05E-03                             | 34,78           |
|                                                               | GO:0045182~translation regulator activity                                                       | 3,58E-03                             | 12,79           |
|                                                               | GO:0070717~poly-purine tract binding                                                            | 3,90E-03                             | 30,91           |
|                                                               | GO:0008026~ATP-dependent helicase activity                                                      | 4,01E-03                             | 5,68            |
|                                                               | GO:0070035~purine NTP-dependent helicase activity                                               | 4,01E-03                             | 5,68            |
|                                                               | GO:0003743~translation initiation factor activity                                               | 4,10E-03                             | 7,60            |
|                                                               | GO:0003730~mRNA 3'-UTR binding                                                                  | 5,88E-03                             | 25,29           |

| Bonferroni | Benjamini | FDR       |
|------------|-----------|-----------|
| 5,32E-125  | 5,32E-125 | 1,42E-124 |
| 1,88E-93   | 9,42E-94  | 5,02E-93  |
| 1,14E-19   | 3,81E-20  | 3,05E-19  |
| 1,08E-14   | 2,71E-15  | 2,89E-14  |
| 2,41E-14   | 4,82E-15  | 6,42E-14  |
| 1,21E-13   | 2,02E-14  | 3,22E-13  |
| 5,91E-11   | 8,44E-12  | 1,58E-10  |
| 1,09E-10   | 1,36E-11  | 2,90E-10  |
| 3,11E-10   | 3,46E-11  | 8,30E-10  |
| 1,24E-08   | 1,24E-09  | 3,32E-08  |
| 9,62E-08   | 8,75E-09  | 2,57E-07  |
| 1,91E-07   | 1,59E-08  | 5,09E-07  |
| 4,66E-07   | 3,58E-08  | 1,24E-06  |
| 5,29E-07   | 3,78E-08  | 1,41E-06  |
| 9,01E-05   | 6,01E-06  | 2,40E-04  |
| 7,89E-04   | 4,93E-05  | 2,10E-03  |
| 8,13E-04   | 4,78E-05  | 2,17E-03  |
| 8,13E-04   | 4,78E-05  | 2,17E-03  |
| 8,13E-04   | 4,78E-05  | 2,17E-03  |
| 1,25E-03   | 6,97E-05  | 3,35E-03  |
| 2,19E-03   | 1,16E-04  | 5,85E-03  |
| 4,78E-03   | 2,40E-04  | 1,28E-02  |
| 4,78E-03   | 2,40E-04  | 1,28E-02  |
| 4,71E-02   | 2,29E-03  | 1,28E-01  |
| 1,29E-01   | 6,26E-03  | 3,68E-01  |
| 1,62E-01   | 7,67E-03  | 4,71E-01  |
| 2,12E-01   | 9,88E-03  | 6,33E-01  |
| 3,66E-01   | 1,80E-02  | 1,21E+00  |
| 6,72E-01   | 4,19E-02  | 2,93E+00  |
| 6,72E-01   | 4,19E-02  | 2,93E+00  |
| 6,72E-01   | 4,19E-02  | 2,93E+00  |
| 7,12E-01   | 4,50E-02  | 3,26E+00  |
| 1,55E-113  | 1,55E-113 | 1,32E-112 |
| 5,13E-108  | 2,57E-108 | 4,35E-107 |
| 8,07E-100  | 2,69E-100 | 6,84E-99  |
| 6,37E-94   | 1,59E-94  | 5,40E-93  |
| 1,59E-81   | 3,18E-82  | 1,35E-80  |
| 2,81E-53   | 4,69E-54  | 2,38E-52  |
| 8,88E-47   | 1,27E-47  | 7,52E-46  |
| 2,51E-46   | 3,14E-47  | 2,13E-45  |
| 5,05E-46   | 5,61E-47  | 4,28E-45  |
| 5,05E-46   | 5,61E-47  | 4,28E-45  |
| 6,33E-46   | 6,33E-47  | 5,37E-45  |
| 9,87E-43   | 8,97E-44  | 8,37E-42  |
| 2,35E-12   | 1,96E-13  | 1,99E-11  |
| 3,91E-08   | 3,01E-09  | 3,31E-07  |
| 1,64E-06   | 1,17E-07  | 1,39E-05  |
| 5,81E-06   | 3,88E-07  | 4,93E-05  |
| 1,13E-05   | 7,08E-07  | 9,60E-05  |
| 2,00E-05   | 1,17E-06  | 1,69E-04  |
| 3,33E-03   | 1,85E-04  | 2,83E-02  |
| 4,25E-03   | 2,24E-04  | 3,61E-02  |
| 6,16E-02   | 3,17E-03  | 5,38E-01  |
| 8,46E-02   | 4,20E-03  | 7,47E-01  |
| 2,69E-93   | 2,69E-93  | 2,00E-92  |
| 2,03E-83   | 1,02E-83  | 1,51E-82  |
| 1,70E-59   | 5,66E-60  | 1,26E-58  |
| 1,06E-15   | 2,65E-16  | 7,88E-15  |
| 1,94E-09   | 3,88E-10  | 1,44E-08  |
| 1,92E-04   | 3,21E-05  | 1,43E-03  |
| 2,93E-02   | 4,24E-03  | 2,21E-01  |
| 3,93E-01   | 6,04E-02  | 3,64E+00  |
| 4,43E-01   | 6,29E-02  | 4,25E+00  |
| 4,71E-01   | 6,17E-02  | 4,62E+00  |
| 4,80E-01   | 5,78E-02  | 4,75E+00  |
| 4,80E-01   | 5,78E-02  | 4,75E+00  |
| 4,88E-01   | 5,42E-02  | 4,85E+00  |
| 6,17E-01   | 7,12E-02  | 6,89E+00  |
