# Supplementary material for: Tracking the Fragile X Mental Retardation Protein in a Highly Ordered Neuronal RiboNucleoParticles Population: A Link between Stalled Polyribosomes and RNA Granules
Source: PubMed Central journal article supplement (PMC4963131; doi:10.1371/journal.pgen.1006192), 2016-07-27
Supplement: pgen.1006192.s009.pdf [file pgen.1006192.s009.pdf]

| Probe ID      | GeneSymbol     | GeneName                                                               | log2FC | FC   | P-value  | Adj p-value | PrimaryAcces | RefSeqAcces  | GenbankAcces | UniProtGeneID | EntrezGeneID | EnsemblID          |
|---------------|----------------|------------------------------------------------------------------------|--------|------|----------|-------------|--------------|--------------|--------------|---------------|--------------|--------------------|
| A_55_P2459897 | <b>A2m</b>     | alpha-2-macroglobulin                                                  | 1.05   | 2.07 | 2.22E-06 | 1.50E-04    | NM_175628    | NM_175628    | NM_175628    | Mm.30151      | 232345       | ENSMUST0000032203  |
| A_55_P2502056 | <b>A3gal2</b>  | alpha-1,3-galactosyltransferase 2 (isoglobotriaoisylcaramide synthase) | 0.85   | 1.80 | 2.13E-05 | 5.72E-04    | NM_001009811 | NM_001009811 | NM_001009811 | Mm.30090      | 215493       | ENSMUST0000030585  |
| A_51_P453043  | <b>Aacs</b>    | acetoacetyl-CoA synthetase                                             | 0.83   | 1.77 | 2.46E-06 | 1.59E-04    | NM_030210    | NM_030210    | NM_030210    | Mm.431573     | 78894        | ENSMUST0000031445  |
| A_55_P2015495 | <b>Abat</b>    | 4-aminobutyl aminotransferase                                          | 0.82   | 1.77 | 1.37E-05 | 4.41E-04    | NM_172961    | NM_172961    | NM_172961    | Mm.259315     | 268680       | ENSMUST0000065987  |
| A_52_P665675  | <b>Abca1</b>   | ATP-binding cassette, sub-family A (ABC1), member 1                    | 1.15   | 2.22 | 1.53E-05 | 4.70E-04    | NM_013454    | NM_013454    | NM_013454    | Mm.273736     | 11303        | ENSMUST0000030010  |
| A_52_P519653  | <b>Abca5</b>   | ATP-binding cassette, sub-family A (ABC1), member 5                    | 1.28   | 2.44 | 8.35E-07 | 9.30E-05    | NM_147219    | NM_147219    | NM_147219    | Mm.41942      | 217265       | ENSMUST0000043961  |
| A_51_P363556  | <b>Abi2</b>    | abi-interactor 2                                                       | 0.95   | 1.94 | 2.05E-05 | 5.59E-04    | NM_198127    | NM_198127    | NM_198127    | Mm.212066     | 329165       | ENSMUST0000052332  |
| A_51_P165196  | <b>Abi2b</b>   | ankyrin repeat and BTB (POZ) domain containing 2                       | 1.00   | 2.00 | 1.48E-05 | 4.62E-04    | NM_178890    | NM_178890    | NM_178890    | Mm.35850      | 99382        | ENSMUST0000076212  |
| A_55_P2082914 | <b>Acly</b>    | ATP citrate lyase                                                      | 1.30   | 2.46 | 1.28E-06 | 1.12E-04    | NM_134037    | NM_134037    | NM_134037    | Mm.222039     | 104112       | ENSMUST0000107385  |
| A_55_P2096043 | <b>Acot11</b>  | acyl-CoA thioesterase 11                                               | 0.82   | 1.76 | 3.81E-05 | 8.05E-04    | NM_025590    | NM_025590    | NM_025590    | Mm.282956     | 329910       | ENSMUST0000020262  |
| A_51_P414305  | <b>Acot12</b>  | acyl-CoA thioesterase 12                                               | 1.06   | 2.08 | 1.23E-05 | 4.11E-04    | NM_028790    | NM_028790    | NM_028790    | Mm.275963     | 74156        | ENSMUST0000020212  |
| A_55_P2186615 | <b>Acp1</b>    | acid phosphatase 1, soluble                                            | 0.95   | 1.93 | 1.07E-05 | 3.81E-04    | NM_00111023  | NM_00111023  | NM_00111023  | Mm.359831     | 11431        | ENSMUST0000062740  |
| A_52_P496956  | <b>Acsbg1</b>  | acyl-CoA synthetase bubblemium family member 1                         | 0.90   | 1.87 | 1.16E-05 | 3.98E-04    | NM_053178    | NM_053178    | NM_053178    | Mm.20692      | 91480        | ENSMUST0000034822  |
| A_55_P1985984 | <b>Actg1</b>   | actin, gamma, cytoplasmic                                              | 0.90   | 1.87 | 2.88E-05 | 6.77E-04    | NM_009609    | NM_009609    | NM_009609    | Mm.426706     | 14165        | ENSMUST0000031103  |
| A_51_P347862  | <b>Actn1</b>   | actinin, alpha 1                                                       | 1.84   | 3.59 | 1.39E-07 | 4.10E-05    | NM_134156    | NM_134156    | NM_134156    | Mm.253564     | 109711       | ENSMUST0000163732  |
| A_51_P108266  | <b>Actn2</b>   | actinin, alpha 2                                                       | 2.42   | 5.35 | 7.82E-09 | 9.66E-06    | NM_033268    | NM_033268    | NM_033268    | Mm.37638      | 114721       | ENSMUST0000168193  |
| A_51_P394788  | <b>Actn4</b>   | actinin, alpha 4                                                       | 1.80   | 3.49 | 4.32E-08 | 2.20E-05    | NM_021895    | NM_021895    | NM_021895    | Mm.81144      | 60595        | ENSMUST0000060840  |
| A_51_P378825  | <b>Actr8</b>   | ARP8 actin-related protein 8                                           | 0.54   | 1.45 | 1.39E-04 | 1.88E-03    | NM_027493    | NM_027493    | NM_027493    | Mm.215110     | 56249        | ENSMUST0000016115  |
| A_55_P2025760 | <b>Adam9</b>   | a disintegrin and metalloproteinase domain 9 (meltrin gamma)           | 0.92   | 1.89 | 6.46E-05 | 1.14E-03    | NM_00127099  | NM_00127099  | NM_00127099  | Mm.28908      | 11502        | ENSMUST0000084032  |
| A_52_P489256  | <b>Adamt1</b>  | disintegrin-like metalloproteinase with thrombospondin type 1 r        | 1.01   | 2.01 | 3.65E-06 | 2.03E-04    | NM_009621    | NM_009621    | NM_009621    | Mm.1421       | 11504        | ENSMUST0000023610  |
| A_52_P233305  | <b>Adamt12</b> | a disintegrin-like and metalloproteinase (reprolysin type) with t      | 0.64   | 1.56 | 5.72E-05 | 1.05E-03    | NM_175501    | NM_175501    | NM_175501    | Mm.482727     | 239337       | ENSMUST00000661318 |
| A_51_P311038  | <b>Adamt15</b> | a disintegrin-like and metalloproteinase (reprolysin type) with t      | 0.88   | 1.84 | 3.83E-05 | 1.34E-03    | NM_00102413  | NM_00102413  | NM_00102413  | Mm.65867      | 235130       | ENSMUST00000661318 |
| A_66_P124114  | <b>Adamt17</b> | disintegrin-like metalloproteinase with thrombospondin type 1 r        | 1.13   | 2.20 | 1.16E-06 | 1.08E-04    | NM_00103387  | NM_00103387  | NM_00103387  | Mm.445763     | 233332       | ENSMUST0000148538  |
| A_55_P1955778 | <b>Adamt4</b>  | disintegrin-like metalloproteinase with thrombospondin type 1 r        | 1.22   | 3.30 | 5.71E-07 | 7.87E-05    | NM_172845    | NM_172845    | NM_172845    | Mm.23156      | 240913       | ENSMUST0000066570  |
| A_52_P3183181 | <b>Adar</b>    | adenosine deaminase, RNA-specific                                      | 0.70   | 1.63 | 1.05E-04 | 1.56E-03    | NM_00103858  | NM_00103858  | NM_00103858  | Mm.316228     | 56417        | ENSMUST0000107405  |
| A_55_P2106645 | <b>Adcy5</b>   | adenylyl cyclase 5                                                     | 0.72   | 1.64 | 2.73E-05 | 6.61E-04    | NM_00101276  | NM_00101276  | NM_00101276  | Mm.41137      | 224129       | ENSMUST0000011943  |
| A_55_P1990336 | <b>Add1</b>    | adducin 1 (alpha)                                                      | 0.75   | 1.69 | 1.47E-04 | 1.95E-03    | NM_00102444  | NM_00102444  | NM_00102444  | Mm.289106     | 11518        | ENSMUST0000114338  |
| A_55_P1988623 | <b>Add3</b>    | adducin 3 (gamma)                                                      | 1.26   | 2.39 | 4.56E-07 | 7.05E-05    | NM_00116409  | NM_00116409  | NM_00116409  | Mm.26808      | 27360        | ENSMUST0000011741  |
| A_66_P105307  | <b>Adnp</b>    | activity-dependent neuroprotective protein                             | 1.42   | 2.67 | 1.68E-05 | 4.96E-04    | NM_009628    | NM_009628    | NM_009628    | Mm.201322     | 11538        | ENSMUST0000057793  |
| A_52_P179583  | <b>Adnp2</b>   | ADNP homeobox 2                                                        | 0.71   | 1.64 | 1.71E-05 | 5.01E-04    | NM_175028    | NM_175028    | NM_175028    | Mm.26594      | 240442       | ENSMUST0000066743  |
| A_55_P2046938 | <b>Adpgk</b>   | ADP-dependent glucokinase                                              | 0.83   | 1.78 | 1.33E-04 | 1.83E-03    | NM_028121    | NM_028121    | NM_028121    | Mm.22456      | 72141        | ENSMUST0000026266  |
| A_52_P424778  | <b>Adra1a</b>  | adrenergic receptor, alpha 1A                                          | 1.17   | 2.25 | 1.82E-05 | 5.20E-04    | NM_013461    | NM_013461    | NM_013461    | Mm.57064      | 11550        | ENSMUST0000054661  |
| A_55_P2019954 | <b>Adrad1</b>  | adrenergic receptor, alpha 1d                                          | 1.08   | 2.12 | 9.53E-07 | 9.82E-05    | NM_013460    | NM_013460    | NM_013460    | Mm.398930     | 11549        | 0                  |
| A_51_P296887  | <b>Adsl</b>    | adenosylsuccinate lyase                                                | 0.79   | 1.73 | 3.07E-05 | 7.09E-04    | NM_009634    | NM_009634    | NM_009634    | Mm.38151      | 11564        | ENSMUST0000166711  |
| A_52_P206613  | <b>Adss</b>    | adenosylsuccinate synthetase, non muscle                               | 0.80   | 1.74 | 4.49E-05 | 8.99E-04    | NM_007422    | NM_007422    | NM_007422    | Mm.338021     | 11566        | ENSMUST00000159184 |
| A_55_P2030030 | <b>Adssl1</b>  | adenosylsuccinate synthetase like 1                                    | 0.49   | 1.40 | 1.27E-04 | 1.78E-03    | NM_007421    | NM_007421    | NM_007421    | Mm.3440       | 11565        | ENSMUST0000180015  |
| A_51_P183283  | <b>Af2</b>     | AF4/FMR2 family, member 2                                              | 1.77   | 3.41 | 3.27E-07 | 6.07E-05    | NM_008032    | NM_008032    | NM_008032    | Mm.466576     | 14266        | ENSMUST0000033532  |
| A_51_P486121  | <b>Af3</b>     | AF4/FMR2 family, member 3                                              | 1.16   | 2.24 | 3.11E-06 | 1.84E-04    | NM_010678    | NM_010678    | NM_010678    | Mm.336679     | 16764        | ENSMUST0000030927  |
| A_52_P551743  | <b>Af4</b>     | AF4/FMR2 family, member 4                                              | 0.99   | 1.99 | 7.64E-05 | 1.26E-03    | NM_033565    | NM_033565    | NM_033565    | Mm.395281     | 93736        | ENSMUST0000069845  |
| A_51_P19544   | <b>Aga</b>     | aspartylglucosaminidase                                                | 1.14   | 2.20 | 9.54E-06 | 3.58E-04    | NM_00100584  | NM_00100584  | NM_00100584  | Mm.334535     | 11593        | ENSMUST0000033920  |
| A_55_P2427685 | <b>Ag1</b>     | amylol-1,6-galactosidase, 4-alpha-glucanotransferase                   | 0.88   | 1.83 | 5.90E-05 | 1.07E-03    | NM_00108132  | NM_00108132  | NM_00108132  | Mm.237099     | 77559        | ENSMUST0000062792  |
| A_55_P2009127 | <b>Agm1</b>    | agrin                                                                  | 1.25   | 2.38 | 9.04E-05 | 1.42E-03    | NM_021604    | NM_021604    | NM_021604    | Mm.273098     | 11603        | ENSMUST0000071248  |
| A_51_P118763  | <b>Ahctf1</b>  | AT hook containing transcription factor 1                              | 0.76   | 1.70 | 5.14E-05 | 9.82E-04    | NM_026375    | NM_026375    | NM_026375    | Mm.128165     | 262747       | ENSMUST00000151734 |
| A_51_P206268  | <b>Ahcy1</b>   | S-adenosylhomocysteine hydrolase-like 1                                | 0.78   | 1.72 | 3.11E-05 | 7.11E-04    | NM_145542    | NM_145542    | NM_145542    | Mm.220328     | 229709       | ENSMUST0000029490  |
| A_52_P162509  | <b>Ahcy2</b>   | S-adenosylhomocysteine hydrolase-like 2                                | 1.01   | 2.01 | 4.89E-05 | 9.52E-04    | NM_021414    | NM_021414    | NM_021414    | Mm.210899     | 74340        | ENSMUST0000011304  |
| A_52_P263095  | <b>Ahnak</b>   | AHNAK neuroprotein (desmoyokin)                                        | 0.92   | 1.89 | 1.48E-04 | 1.96E-03    | NM_009643    | NM_009643    | NM_009643    | Mm.203866     | 66395        | ENSMUST0000092956  |
| A_65_P06603   | <b>Ahr</b>     | aryl-hydrocarbon receptor                                              | 0.80   | 1.74 | 1.08E-04 | 1.59E-03    | NM_013464    | NM_013464    | NM_013464    | Mm.341377     | 11622        | ENSMUST0000011636  |
| A_52_P517289  | <b>Akap1</b>   | A kinase (PRKA) anchor protein 1                                       | 0.99   | 1.99 | 6.98E-05 | 1.19E-03    | NM_00104254  | NM_00104254  | NM_00104254  | Mm.2969       | 11640        | ENSMUST0000153787  |
| A_52_P244964  | <b>Akap11</b>  | A kinase (PRKA) anchor protein 11                                      | 1.24   | 2.49 | 1.63E-07 | 4.35E-05    | NM_00116450  | NM_00116450  | NM_00116450  | Mm.89413      | 219181       | ENSMUST0000022593  |
| A_55_P2099810 | <b>Akap12</b>  | A kinase (PRKA) anchor protein (gravin) 12                             | 1.28   | 2.42 | 1.68E-07 | 4.37E-05    | NM_031185    | NM_031185    | NM_031185    | Mm.27481      | 83397        | ENSMUST0000045730  |
| A_55_P2444515 | <b>Akap2</b>   | A kinase (PRKA) anchor protein 2                                       | 1.44   | 2.20 | 7.45E-06 | 3.10E-04    | NM_00103553  | NM_00103553  | NM_00103553  | Mm.467752     | 11641        | ENSMUST0000098066  |
| A_55_P2350032 | <b>Akap6</b>   | A kinase (PRKA) anchor protein 6                                       | 1.71   | 3.26 | 1.38E-08 | 1.33E-05    | NM_198111    | NM_198111    | NM_198111    | Mm.310822     | 238161       | ENSMUST0000095737  |
| A_66_P106716  | <b>Akap8</b>   | A kinase (PRKA) anchor protein 8                                       | 0.77   | 1.71 | 5.99E-05 | 1.08E-03    | NM_019774    | NM_019774    | NM_019774    | Mm.356393     | 56399        | ENSMUST0000020699  |
| A_55_P2060369 | <b>Akap9</b>   | A kinase (PRKA) anchor protein (ytjooa) 9                              | 1.07   | 2.09 | 2.24E-05 | 5.90E-04    | NM_194462    | NM_194462    | NM_194462    | Mm.46044      | 100986       | ENSMUST0000044492  |
| A_55_P2083649 | <b>Alas1</b>   | aminolevulinic acid synthase 1                                         | 1.35   | 2.55 | 1.54E-07 | 4.22E-05    | NM_020559    | NM_020559    | NM_020559    | Mm.290578     | 11655        | ENSMUST0000134053  |
| A_51_P359272  | <b>Alcam</b>   | activated leukocyte cell adhesion molecule                             | 1.14   | 2.20 | 1.17E-05 | 4.00E-04    | NM_009655    | NM_009655    | NM_009655    | Mm.288282     | 11688        | ENSMUST0000164888  |
| A_65_P19286   | <b>Alg10b</b>  | asparagine-linked glycosylation 10B (alpha-1,2-glucosyltransf          | 0.92   | 1.90 | 2.35E-05 | 6.03E-04    | NM_00103344  | NM_00103344  | NM_00103344  | Mm.17853      | 380959       | ENSMUST0000100309  |
| A_52_P93902   | <b>Alg5</b>    | asparagine-linked glycosylation 5 (dolichyl-phosphate beta-gl          | 0.81   | 1.75 | 1.73E-05 | 5.04E-04    | NM_025442    | NM_025442    | NM_025442    | Mm.144218     | 66248        | ENSMUST0000044567  |
| A_55_P2007663 | <b>Alkbh8</b>  | alkB, alkylation repair homolog 8 (E. coli)                            | 0.75   | 1.69 | 3.09E-05 | 7.10E-04    | NM_026303    | NM_026303    | NM_026303    | Mm.116968     | 67667        | ENSMUST0000165105  |
| A_55_P2454521 | <b>Alms1</b>   | Alstrom syndrome 1                                                     | 0.69   | 1.62 | 3.51E-05 | 7.66E-04    | NM_145223    | NM_145223    | NM_145223    | Mm.246967     | 236266       | ENSMUST0000072018  |
| A_51_P247249  | <b>Alox5</b>   | arachidonate 5-lipoxygenase                                            | 0.86   | 1.81 | 4.39E-06 | 2.24E-04    | NM_009662    | NM_009662    | NM_009662    | Mm.41072      | 11689        | ENSMUST0000016925  |
| A_52_P336585  | <b>Als2</b>    | amyotrophic lateral sclerosis 2 (juvenile)                             | 0.90   | 1.86 | 6.34E-05 | 1.12E-03    | NM_028717    | NM_028717    | NM_028717    | Mm.272078     | 74018        | ENSMUST0000159166  |
| A_55_P2168431 | <b>Amer1</b>   | APC membrane recruitment 1                                             | 1.26   | 2.39 | 2.52E-06 | 1.61E-04    | NM_175179    | NM_175179    | NM_175179    | Mm.182867     | 72345        | ENSMUST0000084535  |
| A_55_P2046509 | <b>Amot</b>    | angiostatin                                                            | 2.35   | 5.09 | 1.81E-08 | 1.50E-05    | NM_153319    | NM_153319    | NM_153319    | Mm.100068     | 27494        | ENSMUST00000112835 |
| A_55_P2244112 | <b>Amotl1</b>  | angiostatin-like 1                                                     | 0.67   | 1.83 | 8.16E-05 | 1.32E-03    | NM_00108136  | NM_00108136  | NM_00108136  | Mm.159552     | 57323        | ENSMUST0000160770  |
| A_51_P348804  |                |                                                                        |        |      |          |             |              |              |              |               |              |                    |

|               |                |                                                                           |      |      |          |          |             |             |             |           |           |                     |
|---------------|----------------|---------------------------------------------------------------------------|------|------|----------|----------|-------------|-------------|-------------|-----------|-----------|---------------------|
| A_52_P302463  | <b>Ar15a</b>   | ADP-ribosylation factor-like 5A                                           | 0.95 | 1.94 | 1.06E-05 | 3.81E-04 | NM_182994   | NM_182994   | NM_182994   | Mm.314378 | 75423     | ENSMUST0000036541   |
| A_51_P301964  | <b>Ar16p1</b>  | ADP-ribosylation factor-like 6 interacting protein 1                      | 0.77 | 1.71 | 3.79E-05 | 8.02E-04 | NM_019419   | NM_019419   | NM_019419   | Mm.29924  | 54208     | ENSMUST0000032888   |
| A_55_P2120469 | <b>Armc2</b>   | armadillo repeat containing 2                                             | 0.61 | 1.53 | 5.81E-05 | 1.06E-03 | NM_0010348E | NM_0010348E | NM_0010348E | Mm.211320 | 213402    | ENSMUST00000160262  |
| A_52_P215418  | <b>Armc9</b>   | armadillo repeat containing 9                                             | 0.71 | 1.64 | 4.46E-05 | 8.96E-04 | NM_027456   | NM_027456   | NM_027456   | Mm.379264 | 87895     | ENSMUST00000156168  |
| A_51_P346641  | <b>Armcx4</b>  | armadillo repeat containing 4                                             | 1.46 | 2.75 | 2.63E-05 | 6.47E-04 | NM_0012025C | NM_0012025C | NM_0012025C | Mm.31961  | 100503043 | 0                   |
| A_51_P191586  | <b>Arpc4</b>   | actin related protein 2/3 complex, subunit 1A                             | 0.58 | 1.49 | 1.36E-04 | 1.85E-03 | NM_019767   | NM_019767   | NM_019767   | Mm.371610 | 56443     | ENSMUST00000142276  |
| A_55_P2057587 | <b>Arx</b>     | aristales related homeobox                                                | 0.88 | 1.84 | 4.27E-05 | 8.69E-04 | NM_007492   | NM_007492   | NM_007492   | Mm.275547 | 11878     | ENSMUST00000046565  |
| A_55_P1964154 | <b>Asah1</b>   | N-acetylserine aminohydroxylase 1                                         | 1.38 | 2.61 | 3.10E-06 | 1.84E-04 | NM_019734   | NM_019734   | NM_019734   | Mm.22547  | 11886     | ENSMUST00000126561  |
| A_55_P2071137 | <b>Asap1</b>   | AriGAP with SH3 domain, ankyrin repeat and PH domain 1                    | 1.13 | 2.19 | 3.02E-06 | 1.81E-04 | NM_010026   | NM_010026   | NM_010026   | Mm.278236 | 13196     | ENSMUST00000230008  |
| A_55_P1957918 | <b>Asap2</b>   | AriGAP with SH3 domain, ankyrin repeat and PH domain 2                    | 0.67 | 1.59 | 7.52E-05 | 1.25E-03 | NM_00113519 | NM_00113519 | NM_00113519 | Mm.358946 | 211914    | ENSMUST00000064595  |
| A_51_P421094  | <b>Ascc3</b>   | activating signal co-receptor 1 complex subunit 3                         | 1.40 | 2.63 | 1.98E-07 | 4.67E-05 | NM_198007   | NM_198007   | NM_198007   | Mm.222497 | 77987     | ENSMUST0000035606   |
| A_51_P223929  | <b>Ash1l</b>   | ash1 (absent, small, or homeotic)-like (Drosophila)                       | 1.71 | 3.28 | 6.68E-07 | 9.54E-05 | NM_138679   | NM_138679   | NM_138679   | Mm.130752 | 192195    | ENSMUST0000009933   |
| A_51_P174645  | <b>Asl</b>     | argininosuccinate lyase                                                   | 0.68 | 1.60 | 2.75E-05 | 6.63E-04 | NM_133768   | NM_133768   | NM_133768   | Mm.23869  | 109900    | ENSMUST00000160129  |
| A_55_P1986228 | <b>Aspm</b>    | asp (abnormal spindle)-like, microcephaly associated (Drosophila)         | 1.96 | 3.95 | 1.09E-08 | 1.18E-05 | NM_009791   | NM_009791   | NM_009791   | Mm.168523 | 11899     | ENSMUST00000053364  |
| A_51_P143951  | <b>Astn1</b>   | astrotactin 1                                                             | 1.19 | 2.28 | 7.41E-07 | 8.79E-05 | NM_007495   | NM_007495   | NM_007495   | Mm.329586 | 11899     | ENSMUST00000046110  |
| A_55_P2398399 | <b>Astn2</b>   | astrotactin 2                                                             | 0.60 | 1.51 | 2.83E-05 | 6.73E-04 | NM_207109   | NM_207109   | NM_207109   | Mm.445312 | 56079     | ENSMUST00000068214  |
| A_51_P140607  | <b>Asun</b>    | asunder, spermatogenesis regulator                                        | 0.75 | 1.68 | 9.52E-05 | 1.47E-03 | NM_138757   | NM_138757   | NM_138757   | Mm.271774 | 71177     | ENSMUST00000032427  |
| A_52_P262219  | <b>Atca</b>    | ataxia, cerebellar, Cayman type homolog (human)                           | 0.56 | 1.47 | 8.30E-05 | 1.33E-03 | NM_178662   | NM_178662   | NM_178662   | Mm.127681 | 16467     | ENSMUST00000047408  |
| A_52_P478729  | <b>Atg2a</b>   | autophagy related 2A                                                      | 0.82 | 1.76 | 3.05E-05 | 7.08E-04 | NM_194348   | NM_194348   | NM_194348   | Mm.273384 | 329015    | ENSMUST000000145600 |
| A_55_P1987988 | <b>Atg2b</b>   | autophagy related 2B                                                      | 0.83 | 1.78 | 2.59E-06 | 1.64E-04 | NM_029654   | NM_029654   | NM_029654   | Mm.114362 | 76559     | ENSMUST00000041055  |
| A_55_P2151762 | <b>Atg7</b>    | autophagy related 7                                                       | 0.82 | 1.76 | 1.47E-04 | 1.95E-03 | NM_00125371 | NM_00125371 | NM_00125371 | Mm.275332 | 74244     | ENSMUST00000169310  |
| A_55_P2424459 | <b>Atg9a</b>   | autophagy related 9A                                                      | 1.17 | 2.25 | 2.71E-06 | 1.68E-04 | NM_00100391 | NM_00100391 | NM_00100391 | Mm.358931 | 245660    | ENSMUST00000040689  |
| A_66_P134534  | <b>Ati2</b>    | atlastin GTPase 2                                                         | 0.82 | 1.76 | 1.14E-04 | 1.65E-03 | NM_019717   | NM_019717   | NM_019717   | Mm.175403 | 56298     | ENSMUST00000068282  |
| A_52_P369581  | <b>Atm</b>     | ataxia telangiectasia mutated homolog (human)                             | 1.24 | 2.36 | 9.50E-06 | 3.58E-04 | NM_007499   | NM_007499   | NM_007499   | Mm.5088   | 11920     | ENSMUST00000118282  |
| A_55_P1971076 | <b>Atp1a</b>   | ATPase, class VI, type 11A                                                | 0.96 | 1.94 | 2.30E-05 | 5.96E-04 | NM_015804   | NM_015804   | NM_015804   | Mm.257837 | 50770     | ENSMUST00000091237  |
| A_55_P2083839 | <b>Atp13a1</b> | ATPase type 13A1                                                          | 1.01 | 2.02 | 6.32E-07 | 8.24E-05 | BC138721    | 0           | BC138721    | Mm.186066 | 170759    | 0                   |
| A_55_P2083841 | <b>Atp13a1</b> | ATPase type 13A1                                                          | 0.80 | 1.75 | 3.06E-05 | 7.08E-04 | NM_133224   | NM_133224   | NM_133224   | Mm.186066 | 170759    | ENSMUST00000034326  |
| A_52_P227267  | <b>Atp1a2</b>  | ATPase, Na <sup>+</sup> /K <sup>+</sup> transporting, alpha 2 polypeptide | 1.23 | 2.34 | 8.86E-05 | 1.40E-03 | NM_178405   | NM_178405   | NM_178405   | Mm.207432 | 98660     | ENSMUST00000131751  |
| A_51_P151484  | <b>Atp1b1</b>  | ATPase, Na <sup>+</sup> /K <sup>+</sup> transporting, beta 1 polypeptide  | 1.03 | 2.05 | 6.06E-05 | 1.09E-03 | NM_009721   | NM_009721   | NM_009721   | Mm.4550   | 11931     | ENSMUST00000027863  |
| A_51_P520384  | <b>Atp1b3</b>  | ATPase, Na <sup>+</sup> /K <sup>+</sup> transporting, beta 3 polypeptide  | 0.74 | 1.67 | 1.41E-04 | 1.90E-03 | NM_007502   | NM_007502   | NM_007502   | Mm.424    | 11933     | ENSMUST00000034983  |
| A_51_P244856  | <b>Atp2a1</b>  | ATPase, Ca <sup>++</sup> transporting, cardiac muscle, fast twitch 1      | 1.86 | 3.63 | 9.03E-07 | 6.98E-05 | NM_007504   | NM_007504   | NM_007504   | Mm.31534  | 11937     | ENSMUST00000032974  |
| A_51_P451075  | <b>Atp2a2</b>  | ATPase, Ca <sup>++</sup> transporting, cardiac muscle, slow twitch 2      | 1.67 | 3.19 | 3.59E-07 | 6.23E-05 | NM_009722   | NM_009722   | NM_009722   | Mm.227583 | 11938     | ENSMUST0000017974   |
| A_66_P138001  | <b>Atp2b1</b>  | ATPase, Ca <sup>++</sup> transporting, plasma membrane 1                  | 1.51 | 2.84 | 1.55E-05 | 4.74E-04 | NM_026482   | NM_026482   | NM_026482   | Mm.166944 | 67972     | ENSMUST00000020107  |
| A_51_P256384  | <b>Atp2b2</b>  | ATPase, Ca <sup>++</sup> transporting, plasma membrane 2                  | 0.93 | 1.90 | 6.09E-06 | 2.76E-04 | NM_009723   | NM_009723   | NM_009723   | Mm.321755 | 11941     | ENSMUST00000010444  |
| A_55_P2013178 | <b>Atp2b3</b>  | ATPase, Ca <sup>++</sup> transporting, plasma membrane 3                  | 0.93 | 1.90 | 4.23E-06 | 2.20E-04 | AK032322    | 0           | AK032322    | Mm.210905 | 320707    | ENSMUST00000033744  |
| A_55_P1985265 | <b>Atp2b4</b>  | ATPase, Ca <sup>++</sup> transporting, plasma membrane 4                  | 1.22 | 2.33 | 1.85E-05 | 5.26E-04 | NM_00116794 | NM_00116794 | NM_00116794 | Mm.188617 | 381290    | ENSMUST00000048953  |
| A_55_P2051899 | <b>Atp2c1</b>  | ATPase, Ca <sup>++</sup> -sequestering                                    | 0.77 | 1.71 | 1.18E-04 | 1.69E-03 | NM_175025   | NM_175025   | NM_175025   | Mm.326247 | 235574    | ENSMUST00000038118  |
| A_55_P2110978 | <b>Atp6a1</b>  | ATPase, H <sup>+</sup> transporting, lysosomal accessory protein 1        | 1.47 | 2.78 | 8.36E-07 | 9.30E-05 | NM_018794   | NM_018794   | NM_018794   | Mm.489655 | 54411     | ENSMUST00000144506  |
| A_52_P428125  | <b>Atr</b>     | ataxia telangiectasia and Rad3 related 3                                  | 1.07 | 2.10 | 2.36E-05 | 6.03E-04 | NM_019864   | NM_019864   | NM_019864   | Mm.212462 | 24500     | ENSMUST00000034980  |
| A_52_P500244  | <b>Atrn</b>    | attractin                                                                 | 0.68 | 1.61 | 1.94E-05 | 5.41E-04 | NM_009730   | NM_009730   | NM_009730   | Mm.119936 | 11990     | ENSMUST00000028781  |
| A_51_P413366  | <b>Atrx</b>    | alpha thalassemia/mental retardation syndrome X-linked hom                | 1.76 | 3.39 | 4.26E-08 | 2.20E-05 | NM_009530   | NM_009530   | NM_009530   | Mm.10141  | 25589     | ENSMUST00000113573  |
| A_66_P120901  | <b>Atxn10</b>  | ataxin 10                                                                 | 1.08 | 2.12 | 7.52E-05 | 1.25E-03 | NM_016843   | NM_016843   | NM_016843   | Mm.248906 | 54138     | ENSMUST00000163242  |
| A_51_P129866  | <b>Atxn11</b>  | ataxin 11-like                                                            | 0.84 | 1.79 | 8.04E-05 | 1.30E-03 | NM_00108093 | NM_00108093 | NM_00108093 | Mm.276770 | 52335     | ENSMUST00000093162  |
| A_55_P2086983 | <b>Atxn2</b>   | ataxin 2                                                                  | 0.72 | 1.64 | 2.35E-05 | 6.03E-04 | NM_009125   | NM_009125   | NM_009125   | Mm.260900 | 20239     | ENSMUST00000051950  |
| A_51_P166339  | <b>Avil</b>    | avillin                                                                   | 1.39 | 2.61 | 2.13E-06 | 1.46E-04 | NM_009635   | NM_009635   | NM_009635   | Mm.10739  | 11567     | ENSMUST00000129173  |
| A_55_P2168692 | <b>Azi1</b>    | 5-azacytidine induced gene 1                                              | 0.64 | 1.56 | 5.29E-05 | 1.00E-03 | NM_009734   | NM_009734   | NM_009734   | Mm.2556   | 12009     | ENSMUST00000145641  |
| A_52_P24631   | <b>Azin1</b>   | antizyme inhibitor 1                                                      | 1.31 | 2.48 | 1.72E-05 | 5.03E-04 | NM_018745   | NM_018745   | NM_018745   | Mm.250214 | 54375     | ENSMUST00000129589  |
| A_52_P236755  | <b>B3gat2</b>  | beta-1,3-glucuronyltransferase 2 (glucuronosyltransferase S)              | 0.90 | 1.86 | 1.48E-05 | 4.60E-04 | NM_172124   | NM_172124   | NM_172124   | Mm.471661 | 280645    | ENSMUST00000140583  |
| A_65_P16680   | <b>Bgalnt5</b> | UDP-Gal-beta-GlcNAc beta 1,4-galactosyltransferase, polypep               | 0.57 | 1.48 | 4.27E-05 | 8.70E-04 | NM_019835   | NM_019835   | NM_019835   | Mm.200886 | 56336     | ENSMUST00000109221  |
| A_51_P283649  | <b>Baat1</b>   | BRCA1-associated ATM activator 1                                          | 0.87 | 1.82 | 9.14E-06 | 3.50E-04 | NM_172724   | NM_172724   | NM_172724   | Mm.271932 | 231841    | ENSMUST00000110806  |
| A_51_P133761  | <b>Bai3</b>    | brain-specific angiogenesis inhibitor 3                                   | 1.22 | 2.32 | 5.00E-06 | 2.43E-04 | NM_175642   | NM_175642   | NM_175642   | Mm.336569 | 210933    | ENSMUST00000153568  |
| A_55_P2138326 | <b>Bai3p3</b>  | BAI1-associated protein 3                                                 | 0.91 | 1.88 | 1.70E-05 | 4.99E-04 | NM_00116327 | NM_00116327 | NM_00116327 | Mm.328859 | 545192    | ENSMUST00000169109  |
| A_51_P463828  | <b>Baz1b</b>   | bromodomain adjacent to zinc finger domain, 1B                            | 0.90 | 1.87 | 2.30E-05 | 5.96E-04 | NM_011714   | NM_011714   | NM_011714   | Mm.40331  | 22385     | ENSMUST00000028285  |
| A_55_P1998637 | <b>Baz2b</b>   | bromodomain adjacent to zinc finger domain, 2B                            | 1.00 | 2.01 | 8.32E-06 | 3.30E-04 | NM_00100118 | NM_00100118 | NM_00100118 | Mm.228071 | 407823    | ENSMUST00000112550  |
| A_55_P2005868 | <b>Bbs7</b>    | Bardet-Biedl syndrome 7 (human)                                           | 0.86 | 1.81 | 1.54E-05 | 4.71E-04 | NM_027810   | NM_027810   | NM_027810   | Mm.286187 | 71492     | ENSMUST00000040148  |
| A_55_P2214491 | <b>Bbs9</b>    | Bardet-Biedl syndrome 9 (human)                                           | 0.52 | 1.43 | 1.51E-04 | 1.99E-03 | NM_178415   | NM_178415   | NM_178415   | Mm.167825 | 319845    | ENSMUST00000147112  |
| A_55_P1971604 | <b>Bcan</b>    | brevican                                                                  | 0.71 | 1.64 | 1.44E-04 | 1.93E-03 | NM_00110975 | NM_00110975 | NM_00110975 | Mm.4998   | 12032     | 0                   |
| A_55_P2127844 | <b>Bcas3</b>   | breast carcinoma amplified sequence 3                                     | 1.41 | 2.65 | 6.20E-07 | 8.24E-05 | NM_00116664 | NM_00116664 | NM_00116664 | Mm.287663 | 192197    | ENSMUST00000144276  |
| A_52_P161495  | <b>Bcl6</b>    | B cell leukemia/lymphoma 6                                                | 0.53 | 1.44 | 1.10E-04 | 1.61E-03 | NM_009744   | NM_009744   | NM_009744   | Mm.347398 | 12053     | ENSMUST00000023151  |
| A_51_P183630  | <b>Bcor</b>    | BCL6 interacting corepressor                                              | 1.14 | 2.20 | 1.98E-06 | 1.41E-04 | NM_029510   | NM_029510   | NM_029510   | Mm.196328 | 71458     | ENSMUST00000043441  |
| A_51_P162437  | <b>Bcr</b>     | breakpoint cluster region                                                 | 0.58 | 1.49 | 1.15E-04 | 1.66E-03 | NM_00108141 | NM_00108141 | NM_00108141 | Mm.488801 | 110279    | ENSMUST00000164107  |
| A_55_P2099232 | <b>Bdp1</b>    | B double prime 1, subunit of RNA polymerase III transcription             | 0.95 | 1.93 | 1.71E-05 | 5.01E-04 | NM_0010810E | NM_0010810E | NM_0010810E | Mm.288546 | 544971    | ENSMUST0000009262   |
| A_51_P365378  | <b>Bes2</b>    | bestrophin 2                                                              | 1.23 | 2.35 | 3.29E-06 | 3.29E-04 | NM_00113019 | NM_00113019 | NM_00113019 | Mm.21514  | 212989    | ENSMUST00000059072  |
| A_51_P297586  | <b>Birc6</b>   | baculoviral IAP repeat-containing 6                                       | 2.12 | 4.35 | 3.17E-08 | 1.33E-05 | NM_007566   | NM_007566   | NM_007566   | Mm.290908 | 12211     | ENSMUST00000024879  |
| A_51_P480904  | <b>Bimh</b>    | bleomycin hydrolase                                                       | 0.66 | 1.58 | 1.99E-05 | 5.48E-04 | NM_178645   | NM_178645   | NM_178645   | Mm.399785 | 104184    | ENSMUST00000021197  |
| A_51_P488196  | <b>Bmper</b>   | BMP-binding endothelial protein                                           | 1.09 | 2.13 |          |          |             |             |             |           |           |                     |

|               |                 |                                                                   |      |      |          |          |             |             |             |           |        |                    |
|---------------|-----------------|-------------------------------------------------------------------|------|------|----------|----------|-------------|-------------|-------------|-----------|--------|--------------------|
| A_52_P600946  | <b>Ccdc88c</b>  | coiled-coil domain containing 88C                                 | 1.28 | 2.43 | 4.19E-06 | 2.18E-04 | NM_026681   | NM_026681   | NM_026681   | Mm.156217 | 68339  | ENSMUST0000068411  |
| A_51_P506201  | <b>Cckbr</b>    | cholecytokinin B receptor                                         | 0.89 | 1.85 | 3.61E-05 | 7.80E-04 | NM_007627   | NM_007627   | NM_007627   | Mm.44513  | 12426  | ENSMUST00000181339 |
| A_55_P1968723 | <b>Ccrnd1</b>   | CCR4 carbon catabolite repression 4-like (S. cerevisiae)          | 0.64 | 1.56 | 5.73E-05 | 1.05E-03 | NM_009834   | NM_009834   | NM_009834   | Mm.86541  | 12457  | ENSMUST0000023849  |
| A_66_P106478  | <b>Cct3</b>     | chaperonin containing Tcp1, subunit 3 (gamma)                     | 1.21 | 2.31 | 2.32E-05 | 6.00E-04 | NM_009836   | NM_009836   | NM_009836   | Mm.256034 | 12462  | ENSMUST00000167000 |
| A_55_P2125912 | <b>Cct6a</b>    | chaperonin containing Tcp1, subunit 6a (zeta)                     | 0.78 | 1.71 | 9.58E-05 | 1.47E-03 | NM_009838   | NM_009838   | NM_009838   | Mm.360232 | 12466  | ENSMUST0000031402  |
| A_52_P456279  | <b>Cct8</b>     | chaperonin containing Tcp1, subunit 8 (theta)                     | 1.08 | 2.11 | 7.58E-06 | 3.12E-04 | NM_009840   | NM_009840   | NM_009840   | Mm.328673 | 12469  | ENSMUST00000176241 |
| A_55_P2174490 | <b>Cd37</b>     | CD37 antigen                                                      | 0.87 | 1.83 | 3.74E-05 | 7.95E-04 | NM_007645   | NM_007645   | NM_007645   | Mm.3689   | 12493  | ENSMUST00000128823 |
| A_52_P383089  | <b>Cd4</b>      | CD4 antigen                                                       | 0.76 | 1.69 | 4.00E-05 | 8.32E-04 | NM_013488   | NM_013488   | NM_013488   | Mm.2209   | 12504  | ENSMUST00000145977 |
| A_55_P2182483 | <b>Cd47</b>     | CD47 antigen (Rh-related antigen, integrin-associated signal I)   | 1.68 | 3.20 | 1.34E-07 | 4.05E-05 | NM_010581   | NM_010581   | NM_010581   | Mm.390865 | 16423  | ENSMUST00000114496 |
| A_51_P337675  | <b>Cd53</b>     | CD53 antigen                                                      | 1.08 | 2.12 | 5.93E-05 | 1.06E-03 | NM_007651   | NM_007651   | NM_007651   | Mm.316861 | 12508  | ENSMUST00000398845 |
| A_52_P20852   | <b>Cd9</b>      | CD9 antigen                                                       | 0.83 | 1.78 | 1.50E-05 | 4.65E-04 | NM_007657   | NM_007657   | NM_007657   | Mm.210676 | 12527  | ENSMUST00000302492 |
| A_52_P263870  | <b>Cdc23</b>    | CDC23 cell division cycle 23                                      | 1.09 | 2.12 | 4.56E-05 | 9.10E-04 | NM_178347   | NM_178347   | NM_178347   | Mm.196638 | 52563  | ENSMUST00000153307 |
| A_55_P2129092 | <b>Cdc42bpa</b> | CDC42 binding protein kinase alpha                                | 0.78 | 1.71 | 9.22E-06 | 3.45E-04 | NM_00103328 | NM_00103328 | NM_00103328 | Mm.259655 | 226751 | ENSMUST00000143350 |
| A_52_P211737  | <b>Cdca2</b>    | cell division cycle associated 2                                  | 0.95 | 1.93 | 2.00E-05 | 5.50E-04 | NM_175384   | NM_175384   | NM_175384   | Mm.33631  | 108912 | ENSMUST00000163100 |
| A_52_P384718  | <b>Cdhl0</b>    | cadherin 10                                                       | 0.88 | 1.84 | 1.12E-05 | 3.90E-04 | NM_009865   | NM_009865   | NM_009865   | Mm.117794 | 320873 | ENSMUST00000176146 |
| A_55_P2067478 | <b>Cdh6</b>     | cadherin 6                                                        | 0.85 | 1.81 | 7.47E-05 | 1.24E-03 | NM_007666   | NM_007666   | NM_007666   | Mm.57048  | 12563  | ENSMUST00000363439 |
| A_51_P518919  | <b>Cdh7</b>     | cadherin 7, type 2                                                | 1.09 | 1.86 | 6.58E-06 | 2.88E-04 | NM_172853   | NM_172853   | NM_172853   | Mm.487119 | 241201 | ENSMUST00000172005 |
| A_55_P1970621 | <b>Cdh8</b>     | cadherin 8                                                        | 0.85 | 1.80 | 3.76E-05 | 7.98E-04 | NM_007667   | NM_007667   | NM_007667   | Mm.441131 | 12564  | ENSMUST00000128860 |
| A_55_P2112235 | <b>Cdk5rap2</b> | CDK5 regulatory subunit associated protein 2                      | 0.73 | 1.66 | 1.51E-04 | 1.98E-03 | NM_145990   | NM_145990   | NM_145990   | Mm.379344 | 214444 | ENSMUST00000138561 |
| A_52_P523915  | <b>Cds2</b>     | CDP-diacylglycerol synthase (phosphatidate cytidylyltransferase)  | 1.01 | 2.01 | 7.52E-06 | 3.10E-04 | NM_138651   | NM_138651   | NM_138651   | Mm.284503 | 110911 | ENSMUST00000103181 |
| A_51_P202971  | <b>Cecr6</b>    | cate syndrome chromosome region, candidate 6                      | 1.02 | 2.03 | 2.87E-06 | 1.75E-04 | NM_033567   | NM_033567   | NM_033567   | Mm.230848 | 94047  | ENSMUST00000178687 |
| A_52_P350148  | <b>Celsr2</b>   | cadherin, EGF LAG seven-pass G-type receptor 2 (flamingo homolog) | 0.95 | 1.93 | 5.87E-05 | 1.07E-03 | NM_00100417 | NM_00100417 | NM_00100417 | Mm.39728  | 53883  | ENSMUST00000126349 |
| A_55_P2017418 | <b>Cfh</b>      | complement component factor h                                     | 1.69 | 3.23 | 1.43E-07 | 4.10E-05 | NM_009888   | NM_009888   | NM_009888   | Mm.8655   | 12628  | ENSMUST00000123238 |
| A_55_P2098995 | <b>Cfr2</b>     | complement factor H-related 2                                     | 2.29 | 4.47 | 6.73E-08 | 2.81E-05 | NM_00102557 | NM_00102557 | NM_00102557 | Mm.439660 | 545366 | ENSMUST0000094889  |
| A_55_P2169415 | <b>Cgn</b>      | cingulin                                                          | 2.55 | 5.84 | 1.02E-09 | 4.68E-06 | NM_00103771 | NM_00103771 | NM_00103771 | Mm.87634  | 70737  | ENSMUST00000107273 |
| A_52_P163201  | <b>Chadl</b>    | chondroaderin-like                                                | 0.56 | 1.48 | 2.60E-05 | 6.44E-04 | NM_00116432 | NM_00116432 | NM_00116432 | Mm.393287 | 214685 | ENSMUST0000072910  |
| A_51_P519837  | <b>Cherp</b>    | calcium homeostasis endoplasmic reticulum protein                 | 0.65 | 1.57 | 8.47E-05 | 1.35E-03 | NM_138585   | NM_138585   | NM_138585   | Mm.30136  | 27967  | ENSMUST00000179510 |
| A_51_P358316  | <b>Chga</b>     | chromogranin A                                                    | 0.67 | 1.59 | 1.08E-04 | 1.59E-03 | NM_007693   | NM_007693   | NM_007693   | Mm.4137   | 12652  | ENSMUST0000021610  |
| A_51_P191669  | <b>Chgb</b>     | chromogranin B                                                    | 1.06 | 2.09 | 7.30E-05 | 1.23E-03 | NM_007694   | NM_007694   | NM_007694   | Mm.255241 | 12653  | ENSMUST00000208826 |
| A_52_P441294  | <b>Chil1</b>    | cell adhesion molecule with homology to L1CAM                     | 0.87 | 1.83 | 3.54E-05 | 7.69E-04 | NM_007697   | NM_007697   | NM_007697   | Mm.251288 | 12661  | ENSMUST0000006905  |
| A_55_P1989782 | <b>Chim1</b>    | chondroderma-like                                                 | 1.15 | 2.21 | 5.59E-06 | 2.61E-04 | NM_021350   | NM_021350   | NM_021350   | Mm.440490 | 12663  | ENSMUST00000104984 |
| A_51_P335758  | <b>Chn1</b>     | chimerin (chimaerin) 1                                            | 0.94 | 1.92 | 1.27E-04 | 1.77E-03 | NM_029716   | NM_029716   | NM_029716   | Mm.489675 | 108699 | ENSMUST00000124450 |
| A_55_P2123683 | <b>Chrd1</b>    | chordin-like 1                                                    | 0.62 | 1.54 | 1.45E-04 | 1.94E-03 | NM_00111438 | NM_00111438 | NM_00111438 | Mm.157697 | 87453  | ENSMUST00000112278 |
| A_55_P2055284 | <b>Chrm2</b>    | cholinergic receptor, muscarinic 2, cardiac                       | 1.12 | 2.17 | 9.95E-05 | 1.41E-03 | NM_203491   | NM_203491   | NM_203491   | Mm.448632 | 243764 | ENSMUST00000172728 |
| A_52_P222026  | <b>Chrm2b</b>   | cholinergic receptor, nicotinic, beta polypeptide 2 (neuronal)    | 0.57 | 1.48 | 1.18E-04 | 1.68E-03 | NM_009602   | NM_009602   | NM_009602   | Mm.35088  | 11444  | ENSMUST00000209562 |
| A_55_P1952950 | <b>Cic</b>      | capicua homolog (Drosophila)                                      | 1.03 | 2.04 | 5.96E-05 | 1.08E-03 | NM_00111013 | NM_00111013 | NM_00111013 | Mm.28833  | 71722  | ENSMUST00000167379 |
| A_55_P1999633 | <b>Cit</b>      | citron                                                            | 0.97 | 1.99 | 3.33E-05 | 7.41E-04 | NM_007708   | NM_007708   | NM_007708   | Mm.8321   | 12704  | ENSMUST00000129736 |
| A_55_P2110215 | <b>Ckap5</b>    | cytoskeleton associated protein 5                                 | 1.19 | 2.28 | 5.04E-07 | 3.71E-05 | NM_00116598 | NM_00116598 | NM_00116598 | Mm.168478 | 12780  | ENSMUST00000337100 |
| A_52_P385606  | <b>Ckb</b>      | creatine kinase, brain                                            | 0.96 | 1.94 | 1.06E-04 | 1.57E-03 | NM_021273   | NM_021273   | NM_021273   | Mm.16831  | 12709  | ENSMUST00000013004 |
| A_55_P1999197 | <b>Clasp1</b>   | CLIP associating protein 1                                        | 0.77 | 1.71 | 5.41E-05 | 1.02E-03 | NM_00108127 | NM_00108127 | NM_00108127 | Mm.138740 | 76707  | ENSMUST00000107989 |
| A_55_P2363983 | <b>Clasp2</b>   | CLIP associating protein 2                                        | 1.22 | 2.34 | 7.07E-06 | 3.00E-04 | NM_00111434 | NM_00111434 | NM_00111434 | Mm.222272 | 76499  | ENSMUST00000163895 |
| A_55_P2121222 | <b>Clcc1</b>    | chloride channel CLIC-like 1                                      | 0.58 | 1.50 | 5.64E-05 | 1.04E-03 | NM_00117777 | NM_00117777 | NM_00117777 | Mm.214545 | 229725 | ENSMUST00000232483 |
| A_55_P2081214 | <b>Clcn6</b>    | chloride channel 6                                                | 1.11 | 2.16 | 2.43E-06 | 1.58E-04 | NM_011929   | NM_011929   | NM_011929   | Mm.89987  | 26372  | ENSMUST00000300879 |
| A_51_P456465  | <b>Cldn10</b>   | claudin 10                                                        | 0.69 | 1.61 | 1.85E-05 | 2.56E-04 | NM_021386   | NM_021386   | NM_021386   | Mm.390755 | 58187  | ENSMUST00000047761 |
| A_51_P409452  | <b>Cldn11</b>   | claudin 11                                                        | 0.84 | 1.79 | 1.00E-05 | 3.68E-04 | NM_008770   | NM_008770   | NM_008770   | Mm.4425   | 18410  | ENSMUST00000046174 |
| A_51_P288906  | <b>Clip1</b>    | CAP-GLY domain containing linker protein 1                        | 1.81 | 3.51 | 4.74E-07 | 7.18E-05 | NM_019765   | NM_019765   | NM_019765   | Mm.241109 | 56437  | ENSMUST00000137602 |
| A_51_P200667  | <b>Clmn</b>     | calmin                                                            | 1.20 | 2.30 | 3.36E-07 | 6.08E-05 | NM_053155   | NM_053155   | NM_053155   | Mm.240378 | 94040  | ENSMUST00000109937 |
| A_52_P164136  | <b>Cln6</b>     | ceroid-lipofuscinosis, neuronal 6                                 | 0.69 | 1.62 | 4.29E-05 | 8.72E-04 | NM_00103317 | NM_00103317 | NM_00103317 | Mm.283636 | 76524  | ENSMUST00000304776 |
| A_51_P407193  | <b>Clp1</b>     | CLP1, cleavage and polyadenylation factor I subunit               | 1.35 | 2.54 | 1.24E-04 | 1.74E-03 | NM_133840   | NM_133840   | NM_133840   | Mm.21583  | 9895   | ENSMUST00000138231 |
| A_66_P134785  | <b>Clpp</b>     | Clp1 caseinolytic peptidase, ATP-dependent, proteolytic subunit   | 0.71 | 1.63 | 1.05E-04 | 1.56E-03 | NM_017393   | NM_017393   | NM_017393   | Mm.287892 | 95895  | ENSMUST0000020735  |
| A_51_P304683  | <b>Clpx</b>     | caseinolytic peptidase X (E.coli)                                 | 1.04 | 2.05 | 1.04E-04 | 1.55E-03 | NM_011802   | NM_011802   | NM_011802   | Mm.30088  | 270166 | ENSMUST00000115501 |
| A_52_P424784  | <b>Clstn2</b>   | calysteinin 2                                                     | 1.06 | 2.09 | 1.24E-06 | 1.10E-04 | NM_022319   | NM_022319   | NM_022319   | Mm.440903 | 64085  | ENSMUST00000305027 |
| A_66_P119174  | <b>Cntn6</b>    | CKLF-like MARVEL transmembrane domain containing 6                | 0.66 | 1.58 | 5.84E-05 | 1.07E-03 | NM_026036   | NM_026036   | NM_026036   | Mm.28859  | 67213  | ENSMUST00000305007 |
| A_55_P2072816 | <b>Cnksr2</b>   | connector enhancer of kinase suppressor of Ras 2                  | 0.89 | 1.85 | 1.38E-04 | 1.87E-03 | NM_177751   | NM_177751   | NM_177751   | Mm.190754 | 245684 | ENSMUST00000202750 |
| A_55_P1953753 | <b>Cnr1</b>     | cannabinoid receptor 1 (brain)                                    | 0.67 | 1.59 | 3.43E-05 | 7.54E-04 | NM_007726   | NM_007726   | NM_007726   | Mm.7992   | 12801  | ENSMUST00000084736 |
| A_66_P125925  | <b>Cntn2</b>    | contactin 2                                                       | 1.19 | 2.28 | 1.93E-05 | 5.40E-04 | NM_177129   | NM_177129   | NM_177129   | Mm.485420 | 21367  | ENSMUST00000086521 |
| A_55_P2157978 | <b>Cntn4</b>    | contactin 4                                                       | 1.21 | 2.31 | 1.42E-04 | 1.91E-03 | NM_00110975 | NM_00110975 | NM_00110975 | Mm.321683 | 269784 | ENSMUST00000113261 |
| A_52_P412452  | <b>Cntn6</b>    | contactin 6                                                       | 1.08 | 2.11 | 5.60E-05 | 1.04E-03 | NM_017383   | NM_017383   | NM_017383   | Mm.321671 | 53870  | ENSMUST00000162872 |
| A_55_P2022128 | <b>Cntnap1</b>  | contactin associated protein-like 1                               | 1.00 | 1.99 | 7.92E-07 | 1.92E-05 | NM_016782   | NM_016782   | NM_016782   | Mm.474527 | 53321  | ENSMUST00000103109 |
| A_52_P215750  | <b>Cntnap2</b>  | contactin associated protein-like 2                               | 1.51 | 2.85 | 8.26E-06 | 3.29E-04 | NM_0010043E | NM_0010043E | NM_0010043E | Mm.440084 | 66797  | ENSMUST00000114641 |
| A_55_P1964653 | <b>Cntnap4</b>  | contactin associated protein-like 4                               | 1.09 | 2.13 | 3.65E-06 | 2.83E-04 | NM_130457   | NM_130457   | NM_130457   | Mm.209232 | 170571 | ENSMUST00000118171 |
| A_52_P150651  | <b>Cog5</b>     | component of oligomeric golgi complex 5                           | 0.88 | 1.85 | 2.85E-05 | 6.76E-04 | NM_00116312 | NM_00116312 | NM_00116312 | Mm.173068 | 238123 | ENSMUST00000306862 |
| A_55_P130824  | <b>Cog8</b>     | component of oligomeric golgi complex 8                           | 0.65 | 1.57 | 6.18E-05 | 1.10E-03 | NM_139229   | NM_139229   | NM_139229   | Mm.288641 | 97484  | ENSMUST00000304391 |
| A_55_P2062469 | <b>Col12a1</b>  | collagen, type XII, alpha 1                                       | 0.99 | 1.99 | 1.30E-05 | 4.25E-04 | NM_007730   | NM_007730   | NM_007730   | Mm.3819   | 12816  | ENSMUST00000071570 |
| A_52_P170882  | <b>Col15a1</b>  | collagen, type XV, alpha 1                                        | 0.63 | 1.55 | 1.31E-04 | 1.81E-03 | NM_009928   | NM_009928   | NM_009928   | Mm.233547 | 12819  | ENSMUST00000102917 |
| A_55_P2124791 | <b>Col18a1</b>  | collagen, type XVIII, alpha 1                                     | 1.04 | 2.05 | 4.10E-05 | 8.45E-04 | NM_00110999 | NM_00110999 | NM_00110999 | Mm.4352   | 12822  | ENSMUST00000072755 |
| A_51_P213676  |                 |                                                                   |      |      |          |          |             |             |             |           |        |                    |



|               |                 |                                                                |      |       |          |          |             |             |             |           |        |                    |
|---------------|-----------------|----------------------------------------------------------------|------|-------|----------|----------|-------------|-------------|-------------|-----------|--------|--------------------|
| A_55_P2032760 | <b>Ctif</b>     | CBP80/20-dependent translation initiation factor               | 0.67 | 1.59  | 1.48E-04 | 1.95E-03 | NM_201354   | NM_201354   | NM_201354   | Mm.36745  | 269037 | ENSMUST00000165559 |
| A_51_P324572  | <b>Ctnna1</b>   | catenin (cadherin associated protein), alpha 1                 | 0.64 | 1.56  | 1.45E-04 | 1.93E-03 | NM_009818   | NM_009818   | NM_009818   | Mm.18962  | 12385  | ENSMUST0000042345  |
| A_51_P438841  | <b>Ctnna2</b>   | catenin (cadherin associated protein), alpha 2                 | 1.21 | 2.32  | 8.88E-07 | 9.65E-05 | NM_009819   | NM_009819   | NM_009819   | Mm.34637  | 12386  | ENSMUST00000159626 |
| A_52_P424585  | <b>Ctnnb1</b>   | catenin (cadherin associated protein), beta 1                  | 1.58 | 2.99  | 1.68E-07 | 4.37E-05 | NM_007614   | NM_007614   | NM_007614   | Mm.291928 | 12387  | ENSMUST00000154356 |
| A_55_P2024215 | <b>Ctnnb1l</b>  | catenin, beta like 1                                           | 0.94 | 1.92  | 1.28E-05 | 4.22E-04 | NM_025680   | NM_025680   | NM_025680   | Mm.45193  | 66642  | ENSMUST00000291178 |
| A_55_P1953252 | <b>Ctnnd1</b>   | catenin (cadherin associated protein), delta 1                 | 0.94 | 1.91  | 4.24E-05 | 8.65E-04 | NM_007615   | NM_007615   | NM_007615   | Mm.35738  | 12388  | ENSMUST0000011694  |
| A_52_P195839  | <b>Ctsc</b>     | cathepsin C                                                    | 0.91 | 1.88  | 3.21E-05 | 7.27E-04 | NM_009982   | NM_009982   | NM_009982   | Mm.323945 | 13032  | ENSMUST00000302779 |
| A_65_P13209   | <b>Ctsd</b>     | cathepsin D                                                    | 1.67 | 3.19  | 1.34E-05 | 4.35E-04 | NM_009983   | NM_009983   | NM_009983   | Mm.221935 | 13033  | ENSMUST00000066401 |
| A_51_P253547  | <b>Ctsl</b>     | cathepsin L                                                    | 0.73 | 1.66  | 7.57E-05 | 1.25E-03 | NM_009984   | NM_009984   | NM_009984   | Mm.930    | 13039  | ENSMUST00000201933 |
| A_52_P326214  | <b>Ctin</b>     | cortactin                                                      | 1.41 | 2.65  | 5.88E-06 | 2.70E-04 | NM_007803   | NM_007803   | NM_007803   | Mm.20601  | 13043  | ENSMUST00000103079 |
| A_52_P481423  | <b>Ctinb2nl</b> | CTNBP2 N-terminal like                                         | 1.04 | 2.06  | 5.52E-05 | 1.03E-03 | NM_030249   | NM_030249   | NM_030249   | Mm.200327 | 80281  | ENSMUST0000007548  |
| A_52_P664699  | <b>Cull1</b>    | cullin 1                                                       | 0.78 | 1.71  | 1.03E-04 | 1.55E-03 | NM_012042   | NM_012042   | NM_012042   | Mm.87611  | 26965  | ENSMUST00000146200 |
| A_55_P2121081 | <b>Cull2</b>    | cullin 2                                                       | 0.97 | 1.97  | 5.11E-05 | 9.78E-04 | NM_029402   | NM_029402   | NM_029402   | Mm.291707 | 71745  | ENSMUST00000080089 |
| A_52_P47645   | <b>Cull3</b>    | cullin 3                                                       | 1.29 | 2.45  | 4.78E-06 | 2.36E-04 | NM_016716   | NM_016716   | NM_016716   | Mm.12665  | 26554  | ENSMUST00000167794 |
| A_55_P2056958 | <b>Cull9</b>    | cullin 9                                                       | 1.54 | 2.92  | 3.36E-07 | 6.08E-05 | NM_00108133 | NM_00108133 | NM_00108133 | Mm.329076 | 78309  | ENSMUST00000066026 |
| A_52_P99810   | <b>Cx3cr1</b>   | chemokine (C-X3-C) receptor 1                                  | 0.63 | 1.55  | 9.20E-05 | 1.43E-03 | NM_009987   | NM_009987   | NM_009987   | Mm.44065  | 13051  | ENSMUST00000177637 |
| A_52_P585124  | <b>Cxcr4</b>    | chemokine (C-X-C motif) receptor 4                             | 0.85 | 1.81  | 8.10E-05 | 1.31E-03 | NM_009911   | NM_009911   | NM_009911   | Mm.1401   | 12671  | ENSMUST00000052172 |
| A_55_P1956667 | <b>Cyfp1</b>    | cytoplasmic FMR1 interacting protein 1                         | 0.83 | 1.77  | 5.70E-05 | 1.05E-03 | NM_00116466 | NM_00116466 | NM_00116466 | Mm.37249  | 20430  | ENSMUST00000032629 |
| A_55_P2102515 | <b>Daam1</b>    | dishevelled associated activator of morphogenesis 1            | 0.84 | 1.79  | 2.63E-05 | 6.47E-04 | NM_026102   | NM_026102   | NM_026102   | Mm.87417  | 20846  | ENSMUST00000085299 |
| A_52_P392216  | <b>Dab1</b>     | disabled 1                                                     | 1.53 | 2.88  | 1.51E-06 | 1.22E-04 | NM_177259   | NM_177259   | NM_177259   | Mm.289682 | 13131  | ENSMUST00000106830 |
| A_55_P1959763 | <b>Dach1</b>    | dachshund 1 (Drosophila)                                       | 0.87 | 1.83  | 1.52E-06 | 1.22E-04 | NM_007826   | NM_007826   | NM_007826   | Mm.320593 | 13134  | ENSMUST00000071533 |
| A_52_P127682  | <b>Dagla</b>    | diacylglycerol lipase, alpha                                   | 0.69 | 1.61  | 3.17E-05 | 7.21E-04 | NM_198114   | NM_198114   | NM_198114   | Mm.329718 | 269606 | ENSMUST00000109521 |
| A_55_P2195157 | <b>Dbn1</b>     | debrin 1                                                       | 4.40 | 21.17 | 2.38E-10 | 3.00E-06 | NM_00117737 | NM_00117737 | NM_00117737 | Mm.19016  | 56320  | ENSMUST00000128922 |
| A_52_P569348  | <b>Dbt</b>      | dihydropolipoamide branched chain transacylase E2              | 0.63 | 1.55  | 7.50E-05 | 1.25E-03 | NM_010022   | NM_010022   | NM_010022   | Mm.3636   | 13171  | ENSMUST00000003049 |
| A_55_P2020497 | <b>Dcaf12l1</b> | DBB1 and CUL4 associated factor 12-like 1                      | 0.94 | 1.92  | 7.75E-06 | 3.16E-04 | NM_178739   | NM_178739   | NM_178739   | Mm.55685  | 245404 | ENSMUST00000060841 |
| A_52_P471502  | <b>Dcaf13</b>   | DBB1 and CUL4 associated factor 13                             | 0.95 | 1.93  | 1.17E-04 | 1.68E-03 | NM_198606   | NM_198606   | NM_198606   | Mm.321937 | 223499 | ENSMUST00000022099 |
| A_66_P130906  | <b>Dcaf7</b>    | DBB1 and CUL4 associated factor 7                              | 1.09 | 2.12  | 8.78E-04 | 6.78E-04 | NM_027946   | NM_027946   | NM_027946   | Mm.307455 | 57183  | ENSMUST00000106891 |
| A_52_P46310   | <b>Dcaf7</b>    | DBB1 and CUL4 associated factor 7                              | 0.74 | 1.67  | 7.12E-05 | 1.21E-03 | NM_027946   | NM_027946   | NM_027946   | Mm.307455 | 71833  | ENSMUST00000058438 |
| A_65_P07978   | <b>Dcc</b>      | deleted in colorectal carcinoma                                | 1.03 | 2.05  | 1.09E-05 | 3.84E-04 | NM_007831   | NM_007831   | NM_007831   | Mm.167882 | 13176  | 0                  |
| A_51_P270355  | <b>Dclk1</b>    | doublecortin-like kinase 1                                     | 0.92 | 1.89  | 2.85E-06 | 1.75E-04 | NM_019978   | NM_019978   | NM_019978   | Mm.39342  | 21375  | ENSMUST00000054237 |
| A_55_P1975385 | <b>Dctn1</b>    | dyncactin 1                                                    | 0.95 | 1.91  | 1.27E-05 | 4.20E-04 | NM_007835   | NM_007835   | NM_007835   | Mm.6919   | 13191  | ENSMUST00000077407 |
| A_55_P2048084 | <b>Dcun1d4</b>  | DCN1, defective in cullin neddylation 1, domain containing 4 ( | 0.69 | 1.61  | 2.81E-05 | 6.72E-04 | NM_178896   | NM_178896   | NM_178896   | Mm.220312 | 100737 | ENSMUST00000135558 |
| A_51_P110471  | <b>Ddah1</b>    | dimethylarginine dimethylaminohydrolase 1                      | 0.74 | 1.67  | 4.97E-05 | 9.60E-04 | NM_026993   | NM_026993   | NM_026993   | Mm.234247 | 69219  | ENSMUST00000127193 |
| A_51_P387220  | <b>Ddx1</b>     | DEAD (Asp-Glu-Ala-Asp) box polypeptide 1                       | 1.01 | 2.02  | 1.49E-05 | 4.62E-04 | NM_134040   | NM_134040   | NM_134040   | Mm.251255 | 104721 | ENSMUST00000071103 |
| A_51_P402994  | <b>Ddx3y</b>    | DEAD (Asp-Glu-Ala-Asp) box polypeptide 3, Y-linked             | 0.96 | 1.95  | 5.60E-06 | 2.61E-04 | NM_012008   | NM_012008   | NM_012008   | Mm.486436 | 26900  | ENSMUST00000091190 |
| A_51_P491470  | <b>Ddx4f</b>    | DEAD (Asp-Glu-Ala-Asp) box polypeptide 47                      | 0.81 | 1.75  | 1.25E-04 | 1.75E-03 | NM_026360   | NM_026360   | NM_026360   | Mm.166524 | 67555  | ENSMUST00000150522 |
| A_51_P141164  | <b>Ddx50</b>    | DEAD (Asp-Glu-Ala-Asp) box polypeptide 50                      | 0.73 | 1.66  | 3.41E-05 | 7.53E-04 | NM_053183   | NM_053183   | NM_053183   | Mm.114116 | 92413  | ENSMUST00000020270 |
| A_51_P497463  | <b>Dedd</b>     | death effector domain-containing                               | 0.75 | 1.68  | 5.93E-05 | 1.08E-03 | NM_011615   | NM_011615   | NM_011615   | Mm.270139 | 29125  | ENSMUST00000097467 |
| A_51_P515085  | <b>Dennd2a</b>  | DENNDMAD domain containing 2A                                  | 1.27 | 2.41  | 2.04E-07 | 4.69E-05 | NM_172477   | NM_172477   | NM_172477   | Mm.440021 | 209773 | ENSMUST00000036877 |
| A_52_P474902  | <b>Denr</b>     | density-regulated protein                                      | 0.60 | 1.51  | 6.79E-05 | 1.17E-03 | NM_026603   | NM_026603   | NM_026603   | Mm.68184  | 26819  | ENSMUST00000166233 |
| A_55_P1984391 | <b>Depdc5</b>   | DEP domain containing 5                                        | 0.97 | 1.95  | 2.67E-05 | 6.53E-04 | NM_177786   | NM_177786   | NM_177786   | Mm.101524 | 277854 | ENSMUST0000018698  |
| A_51_P217236  | <b>Der1f</b>    | Der1-like domain family, member 1                              | 0.76 | 1.70  | 7.75E-05 | 1.27E-03 | NM_024207   | NM_024207   | NM_024207   | Mm.289387 | 67819  | ENSMUST00000022993 |
| A_52_P550843  | <b>Desi2</b>    | desumoylating isopeptidase 2                                   | 0.52 | 1.44  | 6.51E-05 | 1.14E-03 | NM_024282   | NM_024282   | NM_024282   | Mm.440132 | 78825  | ENSMUST00000027783 |
| A_52_P456134  | <b>Dgat1</b>    | diacylglycerol O-acyltransferase 1                             | 0.73 | 1.66  | 2.65E-05 | 6.50E-04 | NM_010046   | NM_010046   | NM_010046   | Mm.22633  | 13350  | ENSMUST00000162354 |
| A_55_P2172935 | <b>Dgkb</b>     | diacylglycerol kinase, beta                                    | 1.02 | 2.02  | 1.76E-05 | 5.10E-04 | AK038544    | 0           | AK038544    | Mm.126255 | 217480 | 0                  |
| A_55_P2022337 | <b>Dhcr7</b>    | 7-dehydrocholesterol reductase                                 | 0.67 | 1.59  | 6.70E-05 | 1.16E-03 | NM_007856   | NM_007856   | NM_007856   | Mm.249342 | 13360  | ENSMUST00000073878 |
| A_51_P293901  | <b>Dhrs1</b>    | dehydrogenase/reductase (SDR family) member 1                  | 0.70 | 1.63  | 1.23E-04 | 1.74E-03 | NM_026819   | NM_026819   | NM_026819   | Mm.21623  | 52585  | ENSMUST00000020403 |
| A_55_P168120  | <b>Dhrs7</b>    | dehydrogenase/reductase (SDR family) member 7                  | 0.68 | 1.60  | 5.55E-05 | 1.03E-03 | NM_025522   | NM_025522   | NM_025522   | Mm.289653 | 66375  | ENSMUST00000021512 |
| A_55_P2040888 | <b>Dhx15</b>    | DEAH (Asp-Glu-Ala-His) box polypeptide 15                      | 1.16 | 2.23  | 7.41E-05 | 1.24E-03 | NM_00104262 | NM_00104262 | NM_00104262 | Mm.9593   | 13204  | ENSMUST00000031061 |
| A_66_P118788  | <b>Dhx29</b>    | DEAH (Asp-Glu-Ala-His) box polypeptide 29                      | 0.89 | 1.85  | 2.73E-06 | 1.68E-04 | NM_172594   | NM_172594   | NM_172594   | Mm.39094  | 186289 | ENSMUST00000038574 |
| A_55_P2036803 | <b>Dhx30</b>    | DEAH (Asp-Glu-Ala-His) box polypeptide 30                      | 0.79 | 1.73  | 4.11E-05 | 8.46E-04 | NM_00125268 | NM_00125268 | NM_00125268 | Mm.276305 | 72831  | ENSMUST00000119941 |
| A_55_P2351505 | <b>Dhx9</b>     | DEAH (Asp-Glu-Ala-His) box polypeptide 9                       | 1.71 | 3.27  | 4.61E-07 | 7.09E-05 | NM_007842   | NM_007842   | NM_007842   | Mm.20000  | 12311  | ENSMUST00000042141 |
| A_51_P427768  | <b>Diap1</b>    | diaphanous homolog 1 (Drosophila)                              | 0.69 | 1.62  | 5.14E-05 | 9.82E-04 | NM_007858   | NM_007858   | NM_007858   | Mm.195916 | 13367  | ENSMUST00000080033 |
| A_51_P192162  | <b>Diap2</b>    | diaphanous homolog 2 (Drosophila)                              | 0.77 | 1.71  | 7.40E-05 | 1.24E-03 | NM_172493   | NM_172493   | NM_172493   | Mm.10763  | 54004  | ENSMUST00000167619 |
| A_51_P336385  | <b>Dido1</b>    | death inducer-oligomer 1                                       | 1.43 | 2.69  | 6.16E-05 | 1.10E-03 | NM_175551   | NM_175551   | NM_175551   | Mm.253936 | 23856  | ENSMUST00000087517 |
| A_55_P1999361 | <b>Dip2a</b>    | DIP2 disco-interacting protein 2 homolog A (Drosophila)        | 1.13 | 2.19  | 7.46E-06 | 3.10E-04 | NM_00108141 | NM_00108141 | NM_00108141 | Mm.33183  | 64451  | ENSMUST00000105417 |
| A_52_P430169  | <b>Dip2b</b>    | DIP2 disco-interacting protein 2 homolog B (Drosophila)        | 1.41 | 2.65  | 3.60E-06 | 2.00E-04 | NM_00115936 | NM_00115936 | NM_00115936 | Mm.243658 | 239667 | ENSMUST00000108971 |
| A_55_P2137376 | <b>Dip2c</b>    | DIP2 disco-interacting protein 2 homolog C (Drosophila)        | 0.69 | 1.62  | 3.34E-05 | 7.43E-04 | NM_00108142 | NM_00108142 | NM_00108142 | Mm.217326 | 208440 | ENSMUST00000174552 |
| A_52_P627068  | <b>Disp2</b>    | dispatched homolog 2 (Drosophila)                              | 1.64 | 3.11  | 4.47E-06 | 2.27E-04 | NM_170593   | NM_170593   | NM_170593   | Mm.212499 | 214240 | ENSMUST00000037547 |
| A_55_P2120807 | <b>Dld</b>      | dihydropolipoamide dehydrogenase                               | 0.98 | 1.97  | 1.37E-05 | 4.41E-04 | NM_007861   | NM_007861   | NM_007861   | Mm.3131   | 13382  | ENSMUST00000110857 |
| A_51_P101858  | <b>Dlg1</b>     | discs, large homolog 1 (Drosophila)                            | 1.13 | 2.19  | 2.52E-06 | 1.61E-04 | NM_007862   | NM_007862   | NM_007862   | Mm.382    | 13383  | ENSMUST00000115201 |
| A_55_P2072238 | <b>Dlg2</b>     | discs, large homolog 2 (Drosophila)                            | 1.47 | 2.77  | 3.38E-06 | 1.93E-04 | NM_011807   | NM_011807   | NM_011807   | Mm.257035 | 23859  | ENSMUST00000074273 |
| A_55_P1999947 | <b>Dlgap2</b>   | discs, large (Drosophila) homolog-associated protein 2         | 1.80 | 3.14  | 1.39E-05 | 4.44E-04 | NM_172910   | NM_172910   | NM_172910   | Mm.404697 | 244310 | ENSMUST00000133298 |
| A_52_P411003  | <b>Dlgap5</b>   | discs, large (Drosophila) homolog-associated protein 5         | 0.78 | 1.71  | 3.83E-05 | 8.09E-04 | NM_144553   | NM_144553   | NM_144553   | Mm.240543 | 218977 | ENSMUST00000043296 |
| A_52_P306697  | <b>Dmd</b>      | dystrophin, muscular dystrophy                                 | 0.97 | 1.96  | 1.14E-05 | 3.93E-04 | NM_007868   | NM_007868   | NM_007868   | Mm.275608 | 13405  | ENSMUST00000149433 |
| A_55_P2179939 | <b>Dmxl2</b>    | Dmx-like 2                                                     | 1.51 | 2.84  | 1.74E-06 | 1.31E-04 | NM_172771   | NM_172771   | NM_172771   | Mm.99636  | 235380 | ENSMUST00000118600 |
| A_55_P1964076 | <b>Dnajb6</b>   | DnaJ (Hsp40) homolog, subfamily B, member 6                    | 0.64 | 1.56  | 4.23E-05 | 8.65E-04 | NM_00103794 | NM_00103794 | NM_00103794 | Mm.293110 | 23950  | ENSMUST00000102734 |
| A_66_P133450  | <b>Dnajb9</b>   | DnaJ (Hsp40) homolog, subfamily B, member 9                    | 1.01 | 2.02  | 1.41E-05 | 4.48E-04 | NM_013760   | NM_013760   | NM_013760   | Mm.27432  | 27362  | ENSMUST00000105049 |
| A_52_P250590  | <b>Dnajc13</b>  | DnaJ (Hsp40) homolog, subfamily C, member 13                   | 1.00 | 1.99  | 5.53E-06 | 2.99E-04 | NM_00116302 | NM_00116302 | NM_00116302 | Mm.217256 | 235567 | ENSMUST00000035170 |
| A_55_P2146304 | <b>Dnajc6</b>   | DnaJ (Hsp40) homolog, subfamily C, member 6                    | 1.30 | 2.47  | 6.45E-06 | 2.85E-04 | NM_00116458 | NM_00116458 | NM_00116458 | Mm.76494  | 27685  | ENSMUST00000106929 |
| A_55_P2079175 | <b>Dnm1</b>     | dynamin 1                                                      | 0.67 | 1.59  | 2.76E-05 | 6.65E-04 | NM_010065   | NM_010065   | NM_010065   | Mm.44736  | 13429  | ENSMUST00000156866 |
| A_55_P2100679 | <b>Dnm2</b>     | dynamin 2                                                      | 0.85 | 1.80  |          |          |             |             |             |           |        |                    |

|               |                 |                                                                     |      |      |          |          |             |             |             |           |        |                    |                   |
|---------------|-----------------|---------------------------------------------------------------------|------|------|----------|----------|-------------|-------------|-------------|-----------|--------|--------------------|-------------------|
| A_55_P1972530 | <b>Eftud1</b>   | elongation factor Tu GTP binding domain containing 1                | 0.92 | 1.89 | 2.96E-05 | 6.91E-04 | NM_175317   | NM_175317   | NM_175317   | Mm.238020 | 101592 | ENSMUST0000039881  |                   |
| A_55_P1956863 | <b>Egfr</b>     | epidermal growth factor receptor                                    | 1.89 | 3.72 | 3.62E-07 | 6.24E-05 | NM_007912   | NM_007912   | NM_007912   | Mm.8534   | 13649  | ENSMUST0000012584  |                   |
| A_55_P2017845 | <b>Ehbp1</b>    | EH domain binding protein 1                                         | 1.09 | 2.13 | 3.46E-05 | 7.45E-04 | NM_00125251 | NM_00125251 | NM_00125251 | Mm.281302 | 216565 | ENSMUST00000134293 |                   |
| A_51_P462918  | <b>Ehhadh</b>   | enoyl-Coenzyme A, hydratase/3-hydroxyacyl Coenzyme A del            | 0.78 | 1.71 | 4.54E-05 | 9.07E-04 | NM_023737   | NM_023737   | NM_023737   | Mm.29100  | 74147  | ENSMUST0000023559  |                   |
| A_52_P620793  | <b>Eif2a</b>    | eukaryotic translation initiation factor 2A                         | 0.88 | 1.85 | 9.83E-05 | 1.50E-03 | NM_0010055C | NM_0010055C | NM_0010055C | Mm.21617  | 229317 | ENSMUST00000135876 |                   |
| A_55_P2073945 | <b>Eif2b3</b>   | eukaryotic translation initiation factor 2B, subunit 3              | 1.06 | 2.09 | 7.80E-06 | 3.17E-04 | NM_00111127 | NM_00111127 | NM_00111127 | Mm.34612  | 108067 | ENSMUST0000070610  |                   |
| A_51_P305532  | <b>Eif2s3x</b>  | eukaryotic translation initiation factor 2, subunit 3, structural g | 0.77 | 1.71 | 2.28E-05 | 5.91E-04 | NM_012010   | NM_012010   | NM_012010   | Mm.218851 | 26905  | ENSMUST0000050328  |                   |
| A_52_P524895  | <b>Eif3a</b>    | eukaryotic translation initiation factor 3, subunit A               | 1.90 | 3.73 | 3.57E-07 | 6.22E-05 | NM_010123   | NM_010123   | NM_010123   | Mm.22328  | 13669  | ENSMUST0000002595  |                   |
| A_52_P455089  | <b>Eif3c</b>    | eukaryotic translation initiation factor 3, subunit C               | 0.73 | 1.66 | 8.82E-05 | 1.39E-03 | ENSMUST0000 |             |             | 0         | 0      | 56347              | ENSMUST0000032992 |
| A_51_P341130  | <b>Eif3k</b>    | eukaryotic translation initiation factor 3, subunit K               | 0.95 | 1.93 | 5.31E-06 | 2.52E-04 | NM_028659   | NM_028659   | NM_028659   | Mm.29714  | 73830  | ENSMUST00000066070 |                   |
| A_66_P103926  | <b>Eif3m</b>    | eukaryotic translation initiation factor 3, subunit M               | 1.04 | 2.06 | 1.05E-05 | 3.77E-04 | NM_145380   | NM_145380   | NM_145380   | Mm.379278 | 98221  | ENSMUST00000111110 |                   |
| A_55_P2046378 | <b>Eif4g1</b>   | eukaryotic translation initiation factor 4, gamma 1                 | 1.11 | 2.16 | 2.21E-05 | 5.85E-04 | NM_145941   | NM_145941   | NM_145941   | Mm.260256 | 208643 | ENSMUST00000115460 |                   |
| A_55_P2034372 | <b>Eif4g3</b>   | eukaryotic translation initiation factor 4, gamma, 3                | 1.17 | 2.25 | 7.45E-06 | 3.10E-04 | NM_00125619 | NM_00125619 | NM_00125619 | Mm.268903 | 230861 | ENSMUST00000084215 |                   |
| A_55_P2181743 | <b>Elmod1</b>   | ELMO/CED-12 domain containing 1                                     | 1.09 | 2.13 | 2.34E-05 | 6.03E-04 | NM_177769   | NM_177769   | NM_177769   | Mm.259791 | 270162 | ENSMUST00000048409 |                   |
| A_55_P1997407 | <b>Eimsan1</b>  | ELM2 and Myb/SANT-like domain containing 1                          | 0.92 | 1.90 | 2.44E-06 | 1.58E-04 | NM_00116350 | NM_00116350 | NM_00116350 | Mm.31256  | 238317 | ENSMUST00000046286 |                   |
| A_52_P609972  | <b>Ein</b>      | elastin                                                             | 0.94 | 1.91 | 4.60E-05 | 9.14E-04 | NM_007925   | NM_007925   | NM_007925   | Mm.275320 | 13717  | 0                  |                   |
| A_51_P463440  | <b>Elov6</b>    | ELOVL family member 6, elongation of long chain fatty acids (       | 0.71 | 1.64 | 9.14E-05 | 1.42E-03 | NM_130450   | NM_130450   | NM_130450   | Mm.314113 | 170439 | ENSMUST00000071402 |                   |
| A_55_P2073647 | <b>Elp2</b>     | elongator acetyltransferase complex subunit 2                       | 0.69 | 1.61 | 3.84E-05 | 8.10E-04 | NM_021448   | NM_021448   | NM_021448   | Mm.25298  | 58523  | ENSMUST00000025120 |                   |
| A_55_P2036285 | <b>Elp4</b>     | elongation protein 4 homolog (S. cerevisiae)                        | 0.93 | 1.91 | 5.84E-05 | 1.07E-03 | NM_023876   | NM_023876   | NM_023876   | Mm.33870  | 77666  | ENSMUST00000028588 |                   |
| A_52_P306537  | <b>Emc1</b>     | ER membrane protein complex subunit 1                               | 0.96 | 1.95 | 8.71E-05 | 1.38E-03 | NM_146157   | NM_146157   | NM_146157   | Mm.394288 | 230866 | ENSMUST00000082262 |                   |
| A_55_P2113673 | <b>Emi1</b>     | echinoderm microtubule associated protein like 1                    | 0.56 | 1.47 | 1.18E-04 | 1.69E-03 | NM_00104333 | NM_00104333 | NM_00104333 | Mm.236645 | 68519  | ENSMUST00000155544 |                   |
| A_51_P392776  | <b>Emi6</b>     | echinoderm microtubule associated protein like 6                    | 0.84 | 1.79 | 6.76E-06 | 2.93E-04 | NM_146016   | NM_146016   | NM_146016   | Mm.445271 | 237711 | ENSMUST00000058902 |                   |
| A_55_P2144386 | <b>Emr1</b>     | EGF-like module containing, mucin-like, hormone receptor-like       | 0.96 | 1.94 | 8.00E-05 | 1.30E-03 | NM_010130   | NM_010130   | NM_010130   | Mm.2254   | 13733  | ENSMUST00000086763 |                   |
| A_51_P126437  | <b>Enc1</b>     | ectodermal-neural cortex 1                                          | 1.23 | 2.35 | 7.82E-06 | 3.17E-04 | NM_007930   | NM_007930   | NM_007930   | Mm.240173 | 13803  | ENSMUST00000041623 |                   |
| A_55_P2055597 | <b>Enpp2</b>    | ectonucleotide pyrophosphatase/phosphodiesterase 2                  | 1.09 | 2.13 | 2.42E-06 | 1.58E-04 | NM_00113607 | NM_00113607 | NM_00113607 | Mm.250256 | 18606  | ENSMUST00000167541 |                   |
| A_52_P411601  | <b>Ep300</b>    | E1A binding protein p300                                            | 1.23 | 2.35 | 1.02E-06 | 1.01E-04 | NM_177821   | NM_177821   | NM_177821   | Mm.258397 | 328272 | ENSMUST00000063887 |                   |
| A_55_P1987449 | <b>Ep400</b>    | E1A binding protein p400                                            | 1.46 | 2.75 | 7.22E-06 | 3.03E-04 | NM_029337   | NM_029337   | NM_029337   | Mm.270456 | 78567  | ENSMUST00000112436 |                   |
| A_51_P250058  | <b>Epas1</b>    | endothelial PAS domain protein 1                                    | 1.30 | 2.47 | 7.18E-07 | 8.68E-05 | NM_010137   | NM_010137   | NM_010137   | Mm.1415   | 13819  | ENSMUST00000024954 |                   |
| A_55_P2023762 | <b>Epha4</b>    | Eph receptor A4                                                     | 1.32 | 2.50 | 1.62E-07 | 4.34E-05 | NM_007936   | NM_007936   | NM_007936   | Mm.400747 | 13838  | ENSMUST00000027451 |                   |
| A_55_P2100425 | <b>Epha5</b>    | Eph receptor A5                                                     | 0.58 | 1.50 | 9.88E-05 | 1.51E-03 | NM_007937   | NM_007937   | NM_007937   | Mm.137919 | 13849  | 0                  |                   |
| A_66_P132657  | <b>Epha6</b>    | Eph receptor A6                                                     | 1.13 | 2.19 | 3.07E-05 | 7.09E-04 | NM_007938   | NM_007938   | NM_007938   | Mm.455790 | 13800  | ENSMUST00000086860 |                   |
| A_52_P306236  | <b>Epha7</b>    | Eph receptor A7                                                     | 0.86 | 1.82 | 6.34E-05 | 1.12E-03 | NM_00112288 | NM_00112288 | NM_00112288 | Mm.257266 | 13841  | ENSMUST00000080934 |                   |
| A_66_P130777  | <b>Epha8</b>    | Eph receptor B4                                                     | 0.99 | 1.98 | 8.29E-05 | 1.33E-03 | NM_00115957 | NM_00115957 | NM_00115957 | Mm.34533  | 13846  | ENSMUST00000144296 |                   |
| A_55_P2124676 | <b>Epm2aip1</b> | EPIM2A (afim) interacting protein 1                                 | 1.01 | 2.01 | 4.58E-06 | 2.30E-04 | NM_175266   | NM_175266   | NM_175266   | Mm.299005 | 77781  | ENSMUST00000060711 |                   |
| A_55_P2007640 | <b>Eprs</b>     | glutamyl-prolyl-HRNA synthetase                                     | 1.56 | 2.96 | 1.32E-06 | 1.14E-04 | NM_029735   | NM_029735   | NM_029735   | Mm.154511 | 107508 | ENSMUST00000046514 |                   |
| A_55_P1982454 | <b>Eps8</b>     | epidermal growth factor receptor pathway substrate 8                | 1.15 | 2.22 | 1.72E-06 | 1.30E-04 | NM_007945   | NM_007945   | NM_007945   | Mm.235346 | 13860  | ENSMUST00000100841 |                   |
| A_51_P104891  | <b>Ept1</b>     | ethanolaminephosphotransferase 1 (CDP-ethanolamine-spec             | 1.31 | 2.48 | 9.80E-07 | 9.96E-05 | NM_027652   | NM_027652   | NM_027652   | Mm.168854 | 28042  | 0                  |                   |
| A_52_P598912  | <b>Erc1</b>     | ELKS/RAB6-interacting/CAST family member 1                          | 1.46 | 2.75 | 3.88E-06 | 2.10E-04 | NM_178085   | NM_178085   | NM_178085   | Mm.288610 | 111713 | ENSMUST00000079582 |                   |
| A_55_P2026530 | <b>Erc2</b>     | ELKS/RAB6-interacting/CAST family member 2                          | 1.65 | 3.14 | 5.60E-07 | 7.79E-05 | NM_177814   | NM_177814   | NM_177814   | Mm.318004 | 238988 | ENSMUST00000093002 |                   |
| A_52_P26953   | <b>Ergic2</b>   | ERGIC and golgi 2                                                   | 1.75 | 3.68 | 1.46E-04 | 1.94E-03 | NM_026355   | NM_026355   | NM_026355   | Mm.59812  | 67456  | ENSMUST00000140311 |                   |
| A_52_P354202  | <b>Eri2</b>     | exoribonuclease 2                                                   | 0.70 | 1.63 | 9.11E-05 | 1.42E-03 | NM_027698   | NM_027698   | NM_027698   | Mm.274160 | 71151  | ENSMUST00000133926 |                   |
| A_55_P508920  | <b>Eriec1</b>   | endoplasmic reticulum lectin 1                                      | 0.72 | 1.65 | 8.71E-05 | 1.38E-03 | NM_025745   | NM_025745   | NM_025745   | Mm.294641 | 66753  | 0                  |                   |
| A_52_P618745  | <b>Ermp1</b>    | endoplasmic reticulum metallopeptidase 1                            | 1.51 | 2.84 | 2.53E-05 | 6.31E-04 | NM_00108121 | NM_00108121 | NM_00108121 | Mm.267131 | 226950 | ENSMUST00000054083 |                   |
| A_55_P216105  | <b>Erfri1</b>   | ERBB receptor feedback inhibitor 1                                  | 0.74 | 1.67 | 1.07E-04 | 1.58E-03 | NM_133753   | NM_133753   | NM_133753   | Mm.318841 | 74160  | ENSMUST00000073600 |                   |
| A_55_P2101806 | <b>Esf1</b>     | ESF1, nucleolar pre-RNA processing protein, homolog (S. ce          | 1.00 | 2.00 | 5.25E-05 | 9.95E-04 | NM_00108105 | NM_00108105 | NM_00108105 | Mm.21228  | 66580  | ENSMUST00000046030 |                   |
| A_65_P19089   | <b>Esrsg</b>    | estrogen-related receptor gamma                                     | 0.94 | 1.92 | 9.52E-05 | 1.47E-03 | NM_00124375 | NM_00124375 | NM_00124375 | Mm.89989  | 62681  | ENSMUST00000027906 |                   |
| A_52_P658122  | <b>Ets2</b>     | E26 avian leukemia oncogene 2, 3' domain                            | 0.74 | 1.67 | 1.69E-05 | 4.96E-04 | NM_011809   | NM_011809   | NM_011809   | Mm.290207 | 23872  | ENSMUST00000023612 |                   |
| A_55_P1971498 | <b>Exoc1</b>    | exocyst complex component 1                                         | 1.03 | 2.04 | 2.57E-06 | 1.63E-04 | NM_027270   | NM_027270   | NM_027270   | Mm.403233 | 69940  | ENSMUST00000087133 |                   |
| A_55_P2037101 | <b>Exoc2</b>    | exocyst complex component 2                                         | 0.97 | 1.96 | 6.90E-06 | 2.95E-04 | NM_025588   | NM_025588   | NM_025588   | Mm.293510 | 66482  | ENSMUST00000102946 |                   |
| A_52_P44030   | <b>Exoc3</b>    | exocyst complex component 3                                         | 1.03 | 2.05 | 1.50E-05 | 4.65E-04 | NM_177333   | NM_177333   | NM_177333   | Mm.489612 | 211486 | ENSMUST00000035934 |                   |
| A_55_P2087518 | <b>Exoc8</b>    | exocyst complex component 8                                         | 0.53 | 1.44 | 1.27E-04 | 1.78E-03 | NM_198103   | NM_198103   | NM_198103   | Mm.347360 | 102058 | ENSMUST00000098312 |                   |
| A_51_P391825  | <b>Exoc10</b>   | exosome component 10                                                | 1.61 | 3.13 | 2.02E-05 | 5.54E-04 | NM_016699   | NM_016699   | NM_016699   | Mm.266635 | 50912  | ENSMUST00000173154 |                   |
| A_52_P496260  | <b>Exoc8</b>    | exosome component 8                                                 | 0.73 | 1.66 | 1.90E-05 | 5.34E-04 | NM_027148   | NM_027148   | NM_027148   | Mm.29253  | 69439  | ENSMUST00000134892 |                   |
| A_55_P2186125 | <b>F13a1</b>    | coagulation factor XIII, A1 subunit                                 | 0.73 | 1.66 | 6.18E-05 | 1.10E-03 | NM_028784   | NM_028784   | NM_028784   | Mm.235105 | 74155  | ENSMUST00000037491 |                   |
| A_52_P678183  | <b>Faf1</b>     | Fas-associated factor family member 2                               | 0.76 | 1.70 | 6.64E-05 | 1.15E-03 | NM_007983   | NM_007983   | NM_007983   | Mm.316259 | 14084  | ENSMUST00000012724 |                   |
| A_51_P255193  | <b>Faf2</b>     | Fas associated factor family member 2                               | 1.70 | 3.40 | 1.48E-04 | 1.95E-03 | NM_178397   | NM_178397   | NM_178397   | Mm.194459 | 76577  | ENSMUST00000128071 |                   |
| A_51_P157982  | <b>Fam115a</b>  | family with sequence similarity 115, member A                       | 0.56 | 2.94 | 2.35E-05 | 6.03E-04 | NM_029930   | NM_029930   | NM_029930   | Mm.24652  | 71758  | ENSMUST00000121083 |                   |
| A_55_P2079142 | <b>Fam124b</b>  | family with sequence similarity 124, member B                       | 1.13 | 2.19 | 1.15E-05 | 3.97E-04 | NM_173425   | NM_173425   | NM_173425   | Mm.145511 | 241128 | ENSMUST00000056748 |                   |
| A_55_P2083489 | <b>Fam129a</b>  | family with sequence similarity 129, member A                       | 0.84 | 1.80 | 3.52E-06 | 1.98E-04 | NM_022018   | NM_022018   | NM_022018   | Mm.482559 | 63913  | ENSMUST00000095741 |                   |
| A_51_P428578  | <b>Fam134b</b>  | family with sequence similarity 134, member B                       | 0.86 | 1.82 | 1.16E-04 | 1.67E-03 | NM_025459   | NM_025459   | NM_025459   | Mm.25311  | 66270  | ENSMUST00000110438 |                   |
| A_51_P329966  | <b>Fam13a</b>   | family with sequence similarity 13, member A                        | 0.89 | 1.85 | 2.35E-05 | 6.03E-04 | NM_153574   | NM_153574   | NM_153574   | Mm.68173  | 58909  | ENSMUST00000089860 |                   |
| A_52_P561377  | <b>Fam160b1</b> | family with sequence similarity 160, member B1                      | 0.69 | 1.61 | 1.18E-04 | 1.69E-03 | NM_145505   | NM_145505   | NM_145505   | Mm.358870 | 226252 | ENSMUST00000036407 |                   |
| A_51_P103594  | <b>Fam162b</b>  | family with sequence similarity 162, member B                       | 0.62 | 1.54 | 1.07E-04 | 1.58E-03 | NM_029894   | NM_029894   | NM_029894   | Mm.30588  | 77266  | ENSMUST00000020064 |                   |
| A_55_P2067091 | <b>Fam179b</b>  | family with sequence similarity 179, member B                       | 0.73 | 1.66 | 3.24E-05 | 7.30E-04 | NM_177805   | NM_177805   | NM_177805   | Mm.138465 | 62818  | ENSMUST00000066296 |                   |
| A_52_P572473  | <b>Fam184b</b>  | family with sequence similarity 184, member B                       | 1.34 | 2.53 | 1.27E-07 | 3.94E-05 | NM_021416   | NM_021416   | NM_021416   | Mm.264666 | 32207  | ENSMUST00000016023 |                   |
| A_55_P1959331 | <b>Fam193a</b>  | family with sequence similarity 193, member A                       | 1.03 | 2.04 | 4.10E-05 | 8.45E-04 | NM_00124312 | NM_00124312 | NM_00124312 | Mm.288524 | 33     |                    |                   |

|                |                |                                                               |      |      |          |          |                        |             |             |           |        |                     |
|----------------|----------------|---------------------------------------------------------------|------|------|----------|----------|------------------------|-------------|-------------|-----------|--------|---------------------|
| A_51_P398723   | <b>Flt1</b>    | FMS-like tyrosine kinase 1                                    | 1,10 | 2,15 | 1,05E-05 | 3,79E-04 | NM_010228              | NM_010228   | NM_010228   | Mm.389712 | 14254  | ENSMUST00000031653  |
| A_55_P2005426  | <b>Fmn2</b>    | formin 2                                                      | 1,67 | 3,18 | 9,28E-07 | 9,75E-05 | NM_019445              | NM_019445   | NM_019445   | Mm.330620 | 54418  | ENSMUST00000030039  |
| A_55_P2153783  | <b>Fmo1</b>    | flavin containing monooxygenase 1                             | 0,91 | 1,88 | 4,97E-05 | 9,60E-04 | NM_010231              | NM_010231   | NM_010231   | Mm.975    | 14261  | ENSMUST00000011058  |
| A_55_P2183110  | <b>Fmr1</b>    | fragile X mental retardation syndrome 1                       | 0,92 | 1,90 | 3,83E-05 | 8,09E-04 | NM_008031              | NM_008031   | NM_008031   | Mm.3451   | 14265  | ENSMUST00000014284  |
| A_55_P2130178  | <b>Fn1</b>     | fibronectin 1                                                 | 2,52 | 5,73 | 1,06E-04 | 1,18E-05 | NM_010233              | NM_010233   | NM_010233   | Mm.193099 | 14268  | ENSMUST00000052626  |
| A_55_P1989519  | <b>Fndc1</b>   | fibronectin type III domain containing 1                      | 1,31 | 2,48 | 1,44E-04 | 1,93E-03 | NM_0108141NM_0108141   | NM_0108141  | NM_0108141  | Mm.379161 | 14655  | ENSMUST00000097425  |
| A_52_P33800    | <b>Fndc3a</b>  | fibronectin type III domain containing 3A                     | 0,49 | 1,40 | 1,29E-04 | 1,79E-03 | NM_207636              | NM_207636   | NM_207636   | Mm.205421 | 319448 | ENSMUST00000089017  |
| A_55_P20091836 | <b>Fnip1</b>   | folliculin interacting protein 1                              | 0,93 | 1,91 | 2,12E-05 | 5,71E-04 | NM_173753              | NM_173753   | NM_173753   | Mm.34087  | 216742 | ENSMUST00000046835  |
| A_52_P235479   | <b>Fnb1</b>    | farnesyltransferase, CAAX box, beta                           | 0,72 | 1,65 | 9,08E-05 | 1,42E-03 | NM_145927              | NM_145927   | NM_145927   | Mm.151174 | 110606 | ENSMUST000000041008 |
| A_55_P2081349  | <b>Focad</b>   | focadhesin                                                    | 0,65 | 1,57 | 1,20E-04 | 1,71E-03 | NM_0108118NM_0108118   | NM_0108118  | NM_0108118  | Mm.287210 | 230393 | ENSMUST00000097992  |
| A_51_P229886   | <b>Fpgt</b>    | fructose-1-phosphate guanylyltransferase                      | 0,71 | 1,64 | 1,26E-04 | 1,76E-03 | NM_029330              | NM_029330   | NM_029330   | Mm.35218  | 75540  | ENSMUST00000066568  |
| A_51_P383270   | <b>Fras1</b>   | Fraser syndrome 1 homolog (human)                             | 1,08 | 2,12 | 1,14E-06 | 1,06E-04 | NM_175473              | NM_175473   | NM_175473   | Mm.291120 | 231470 | ENSMUST00000036019  |
| A_55_P20097869 | <b>Frem2</b>   | Fras 1 related extracellular matrix protein 2                 | 0,83 | 1,78 | 4,20E-05 | 8,60E-04 | NM_172862              | NM_172862   | NM_172862   | Mm.38378  | 242022 | ENSMUST00000091137  |
| A_55_P2030383  | <b>Frm4a</b>   | FERM domain containing 4A                                     | 0,83 | 1,78 | 1,41E-04 | 1,90E-03 | NM_00117784NM_00117784 | NM_00117784 | NM_00117784 | Mm.37932  | 209630 | ENSMUST00000075767  |
| A_51_P463401   | <b>Fry</b>     | furry homolog (Drosophila)                                    | 1,90 | 3,74 | 6,24E-04 | 2,80E-04 | NM_172887              | NM_172887   | NM_172887   | Mm.216590 | 320365 | ENSMUST00000087204  |
| A_55_P2289819  | <b>Fryl</b>    | furry homolog-like (Drosophila)                               | 0,88 | 1,84 | 9,94E-05 | 1,51E-03 | NM_028194              | NM_028194   | NM_028194   | Mm.490279 | 72321  | ENSMUST00000094700  |
| A_52_P568235   | <b>Fstl5</b>   | folistatin-like 5                                             | 1,11 | 2,15 | 5,83E-07 | 7,93E-05 | NM_178673              | NM_178673   | NM_178673   | Mm.490527 | 212613 | ENSMUST00000038364  |
| A_55_P2043837  | <b>Ftsjd2</b>  | FtsJ methyltransferase domain containing 2                    | 0,76 | 1,70 | 4,33E-05 | 8,79E-04 | NM_028791              | NM_028791   | NM_028791   | Mm.475060 | 74157  | ENSMUST00000130871  |
| A_52_P513842   | <b>Fubp1</b>   | fur upstream element (FUSE) binding protein 1                 | 0,77 | 1,70 | 1,24E-04 | 1,74E-03 | NM_057172              | NM_057172   | NM_057172   | Mm.278922 | 51886  | ENSMUST00000106121  |
| A_55_P2017183  | <b>Fuk</b>     | fucosyltransferase 8                                          | 0,78 | 1,72 | 2,86E-05 | 6,77E-04 | NM_172283              | NM_172283   | NM_172283   | Mm.102591 | 234730 | ENSMUST000000041382 |
| A_66_P124755   | <b>Fut8</b>    | fucosyltransferase 8                                          | 0,55 | 1,46 | 1,45E-04 | 1,93E-03 | NM_00125261NM_00125261 | NM_00125261 | NM_00125261 | Mm.35628  | 53618  | ENSMUST00000017595  |
| A_51_P412223   | <b>Fv1</b>     | Friend virus susceptibility 1                                 | 0,58 | 1,50 | 1,28E-04 | 1,78E-03 | NM_010244              | NM_010244   | NM_010244   | Mm.426207 | 14349  | ENSMUST000000094481 |
| A_55_P2069415  | <b>Fxr1</b>    | fragile X mental retardation gene 1, autosomal homolog        | 0,92 | 1,89 | 2,70E-05 | 6,56E-04 | NM_008053              | NM_008053   | NM_008053   | Mm.259021 | 14359  | ENSMUST000000167354 |
| A_51_P142107   | <b>Fzd7</b>    | fizzled homolog 7 (Drosophila)                                | 0,86 | 1,81 | 2,37E-05 | 6,05E-04 | NM_008057              | NM_008057   | NM_008057   | Mm.297906 | 14369  | ENSMUST000000114246 |
| A_55_P1963309  | <b>G3bp1</b>   | Ras-GTPase-activating protein SH3-domain binding protein 1    | 0,88 | 1,84 | 6,86E-06 | 2,94E-04 | NM_013716              | NM_013716   | NM_013716   | Mm.381209 | 27041  | ENSMUST00000018727  |
| A_52_P556281   | <b>G3bp2</b>   | GTPase activating protein (SH3 domain) binding protein 2      | 1,08 | 2,12 | 1,32E-05 | 4,30E-04 | NM_00108075NM_00108075 | NM_00108075 | NM_00108075 | Mm.290530 | 23881  | ENSMUST00000113127  |
| A_55_P2024439  | <b>Gaa</b>     | glucosidase, alpha, acid                                      | 1,41 | 2,65 | 8,25E-06 | 3,29E-04 | NM_008064              | NM_008064   | NM_008064   | Mm.4793   | 14387  | ENSMUST000000128753 |
| A_55_P2082135  | <b>Gabbr1</b>  | gamma-aminobutyric acid (GABA) B receptor, 1                  | 0,91 | 1,88 | 6,22E-05 | 1,11E-03 | NM_019439              | NM_019439   | NM_019439   | Mm.32191  | 54393  | ENSMUST00000138233  |
| A_66_P118170   | <b>Gabrg1</b>  | gamma-aminobutyric acid (GABA) A receptor, subunit gamma      | 0,98 | 1,98 | 1,13E-04 | 1,64E-03 | NM_010252              | NM_010252   | NM_010252   | Mm.255922 | 14405  | ENSMUST00000031119  |
| A_55_P1965694  | <b>Gabrg2</b>  | gamma-aminobutyric acid (GABA) A receptor, subunit gamma      | 0,83 | 1,78 | 1,47E-04 | 1,95E-03 | NM_008073              | NM_008073   | NM_008073   | Mm.5309   | 14405  | ENSMUST00000109292  |
| A_52_P144310   | <b>Gad1</b>    | glutamate decarboxylase 1                                     | 1,24 | 2,37 | 3,20E-06 | 1,87E-04 | NM_008077              | NM_008077   | NM_008077   | Mm.271210 | 14416  | ENSMUST00000104078  |
| A_51_P495462   | <b>Gad2</b>    | glutamic acid decarboxylase 2                                 | 1,04 | 2,06 | 4,14E-06 | 2,17E-04 | NM_008078              | NM_008078   | NM_008078   | Mm.4784   | 14417  | ENSMUST00000028123  |
| A_55_P2050083  | <b>Gak</b>     | cyclin G associated kinase                                    | 0,75 | 1,68 | 7,41E-05 | 1,24E-03 | NM_153569              | NM_153569   | NM_153569   | Mm.276647 | 231580 | ENSMUST00000145647  |
| A_55_P2048210  | <b>Ganab</b>   | alpha glucosidase 2 alpha neutral subunit                     | 0,91 | 1,88 | 6,23E-05 | 1,11E-03 | NM_008060              | NM_008060   | NM_008060   | Mm.3196   | 14376  | ENSMUST00000096246  |
| A_55_P2037425  | <b>Gapdh</b>   | glyceraldehyde-3-phosphate dehydrogenase                      | 0,63 | 1,54 | 4,98E-05 | 9,61E-04 | NM_008084              | NM_008084   | NM_008084   | Mm.343110 | 14433  | ENSMUST00000118875  |
| A_51_P326393   | <b>Gapv1</b>   | GTPase activating protein and VPS9 domains 1                  | 1,40 | 2,65 | 2,03E-07 | 4,69E-05 | NM_025709              | NM_025709   | NM_025709   | Mm.156452 | 66691  | ENSMUST00000130399  |
| A_51_P436201   | <b>Gart</b>    | phosphoribosylglycylamide formyltransferase                   | 1,63 | 3,09 | 2,12E-07 | 4,78E-05 | NM_010256              | NM_010256   | NM_010256   | Mm.4905   | 14450  | ENSMUST000000167354 |
| A_55_P1990483  | <b>Gas2l1</b>  | growth arrest-specific 2 like 1                               | 0,93 | 1,90 | 6,40E-06 | 2,84E-04 | NM_144560              | NM_144560   | NM_144560   | Mm.44591  | 78926  | ENSMUST000000537146 |
| A_55_P2064676  | <b>Gas2l3</b>  | growth arrest-specific 2 like 3                               | 1,34 | 2,53 | 1,53E-06 | 1,22E-04 | AK171905               | 0           | AK171905    | Mm.11982  | 237436 | 0                   |
| A_55_P2377527  | <b>Gbfl1</b>   | golgi-arrest-brefeldin A-resistance factor 1                  | 1,59 | 3,01 | 1,50E-06 | 1,21E-04 | NM_178930              | NM_178930   | NM_178930   | Mm.271620 | 107338 | ENSMUST00000177406  |
| A_51_P463860   | <b>Gbp7</b>    | guanylate binding protein 7                                   | 0,76 | 1,69 | 3,31E-05 | 7,40E-04 | NM_145545              | NM_145545   | NM_145545   | Mm.45740  | 229900 | ENSMUST00000040597  |
| A_52_P3361669  | <b>Gcc2</b>    | GRIP and coiled-coil domain containing 2                      | 1,16 | 2,24 | 1,07E-05 | 3,81E-04 | NM_027375              | NM_027375   | NM_027375   | Mm.5531   | 70297  | ENSMUST00000162965  |
| A_55_P2169714  | <b>Gcn11</b>   | GCN1 general control of amino-acid synthesis 1-like 1 (yeast) | 1,23 | 2,34 | 4,56E-06 | 2,29E-04 | NM_172719              | NM_172719   | NM_172719   | Mm.153014 | 231659 | ENSMUST00000064454  |
| A_55_P2154242  | <b>Gfpt1</b>   | glutamine fructose-6-phosphate transaminase 1                 | 0,75 | 1,68 | 1,00E-04 | 1,51E-03 | NM_013528              | NM_013528   | NM_013528   | Mm.19893  | 14583  | 0                   |
| A_55_P1997465  | <b>Ggnb1p</b>  | gametogonin binding protein 1                                 | 0,98 | 1,97 | 2,70E-06 | 1,68E-04 | NM_027544              | NM_027544   | NM_027544   | Mm.440437 | 70772  | ENSMUST00000133257  |
| A_55_P2061381  | <b>Ghitm</b>   | growth hormone inducible transmembrane protein                | 0,87 | 1,82 | 1,32E-04 | 1,82E-03 | NM_00119912NM_00119912 | NM_00119912 | NM_00119912 | Mm.182912 | 66092  | ENSMUST00000042564  |
| A_55_P2039712  | <b>Gigy2f</b>  | GRB10 interacting GYF protein 2                               | 1,01 | 2,01 | 8,69E-06 | 3,39E-04 | NM_146112              | NM_146112   | NM_146112   | Mm.23065  | 227331 | ENSMUST00000027475  |
| A_52_P174915   | <b>Gja1</b>    | gap junction protein, alpha 1                                 | 1,33 | 2,52 | 2,76E-05 | 6,64E-04 | NM_010288              | NM_010288   | NM_010288   | Mm.378921 | 14609  | ENSMUST00000068581  |
| A_66_P105564   | <b>Gjc2</b>    | gap junction protein, gamma 2                                 | 1,12 | 2,17 | 7,03E-06 | 2,99E-04 | NM_175452              | NM_175452   | NM_175452   | Mm.400116 | 118454 | ENSMUST00000108793  |
| A_51_P337543   | <b>Gice</b>    | glycyl prolyl C-epimerase                                     | 0,69 | 1,62 | 3,95E-05 | 8,26E-04 | NM_033320              | NM_033320   | NM_033320   | Mm.24411  | 93683  | ENSMUST00000034785  |
| A_51_P260548   | <b>Gig1</b>    | golgi apparatus protein 1                                     | 0,72 | 1,65 | 1,07E-04 | 1,58E-03 | NM_009149              | NM_009149   | NM_009149   | Mm.276271 | 20340  | ENSMUST00000164283  |
| A_52_P357829   | <b>Glil2</b>   | GLL-Kruppel family member GLI2                                | 1,17 | 2,24 | 2,07E-05 | 5,61E-04 | NM_0108112NM_0108112   | NM_0108112  | NM_0108112  | Mm.273292 | 14633  | ENSMUST00000062483  |
| A_66_P133520   | <b>Glnn</b>    | glomulin, FKBP associated protein                             | 0,77 | 1,71 | 4,75E-05 | 9,39E-04 | NM_133248              | NM_133248   | NM_133248   | Mm.41417  | 170823 | ENSMUST00000124546  |
| A_51_P445532   | <b>Gira1</b>   | glycine receptor, alpha 1 subunit                             | 0,63 | 1,55 | 8,49E-05 | 1,36E-03 | NM_020492              | NM_020492   | NM_020492   | Mm.89320  | 14654  | ENSMUST00000102716  |
| A_55_P2108171  | <b>Glud1</b>   | glutamate dehydrogenase 1                                     | 0,78 | 1,71 | 1,51E-05 | 4,66E-04 | NM_008133              | NM_008133   | NM_008133   | Mm.10800  | 14661  | ENSMUST00000023232  |
| A_51_P133060   | <b>Glyr1</b>   | glyoxylate reductase 1 homolog (Arabidopsis)                  | 0,88 | 1,84 | 2,75E-05 | 6,63E-04 | NM_00107981NM_00107981 | NM_00107981 | NM_00107981 | Mm.21652  | 74022  | ENSMUST00000115844  |
| A_51_P276939   | <b>Gmp1</b>    | Gem-interacting protein                                       | 0,82 | 1,77 | 5,18E-05 | 9,86E-04 | NM_198101              | NM_198101   | NM_198101   | Mm.324305 | 78016  | ENSMUST00000036074  |
| A_51_P430257   | <b>Gmpr2</b>   | guanosine monophosphate reductase 2                           | 0,99 | 1,98 | 3,09E-05 | 7,10E-04 | NM_177992              | NM_177992   | NM_177992   | Mm.390685 | 105446 | ENSMUST00000023997  |
| A_52_P47255    | <b>Gmps</b>    | guanine monophosphate synthetase                              | 1,09 | 2,14 | 1,68E-05 | 4,94E-04 | NM_00103330NM_00103330 | NM_00103330 | NM_00103330 | Mm.310151 | 239633 | ENSMUST000000029405 |
| A_55_P2041784  | <b>Gna13</b>   | guanine nucleotide binding protein, alpha 13                  | 0,78 | 1,71 | 5,05E-06 | 2,44E-04 | NM_010303              | NM_010303   | NM_010303   | Mm.193925 | 14678  | ENSMUST00000020930  |
| A_52_P304858   | <b>Gnb1</b>    | guanine nucleotide binding protein (G protein), beta 1        | 0,90 | 1,87 | 9,89E-05 | 1,51E-03 | NM_008142              | NM_008142   | NM_008142   | Mm.2344   | 14684  | ENSMUST00000176337  |
| A_55_P1964053  | <b>Golg4a</b>  | golgi autoantigen, golgin subfamily a, 4                      | 1,28 | 2,42 | 1,48E-07 | 4,18E-05 | NM_018748              | NM_018748   | NM_018748   | Mm.10409  | 54214  | ENSMUST00000084820  |
| A_55_P2051859  | <b>Golg1b</b>  | golgi autoantigen, golgin subfamily b, macrogolgin 1          | 1,13 | 2,18 | 3,28E-06 | 1,90E-04 | NM_030035              | NM_030035   | NM_030035   | Mm.244815 | 224139 | ENSMUST00000039855  |
| A_55_P2138041  | <b>Gon4l</b>   | gon-4-like (C.elegans)                                        | 0,91 | 1,87 | 1,63E-05 | 4,87E-04 | NM_00124237NM_00124237 | NM_00124237 | NM_00124237 | Mm.126870 | 76022  | ENSMUST00000090942  |
| A_55_P20212296 | <b>Gopc</b>    | golgi-associated PDZ and coiled-coil motif containing         | 0,72 | 1,65 | 4,91E-06 | 2,40E-04 | NM_00119927NM_00119927 | NM_00119927 | NM_00119927 | Mm.390258 | 94221  | ENSMUST00000105475  |
| A_51_P167374   | <b>Gpatch1</b> | G patch domain containing 1                                   | 0,59 | 1,51 | 1,41E-04 |          |                        |             |             |           |        |                     |



|               |                 |                                                                  |      |      |          |          |             |             |             |           |        |                    |
|---------------|-----------------|------------------------------------------------------------------|------|------|----------|----------|-------------|-------------|-------------|-----------|--------|--------------------|
| A_51_P484998  | <b>Hgf</b>      | hepatocyte growth factor                                         | 0.90 | 1.87 | 2.05E-04 | 5.59E-04 | NM_010427   | NM_010427   | NM_010427   | Mm.267078 | 15234  | ENSMUST0000030683  |
| A_51_P1969276 | <b>Hhip</b>     | Hedgehog-interacting protein                                     | 1.17 | 2.25 | 1.19E-05 | 4.02E-04 | NM_020259   | NM_020259   | NM_020259   | Mm.254493 | 15245  | ENSMUST0000007908  |
| A_51_P2317001 | <b>Hhip1f</b>   | hedgehog interacting protein-like 1                              | 1.25 | 2.38 | 5.21E-07 | 7.45E-05 | NM_00104438 | NM_00104438 | NM_00104438 | Mm.36423  | 214305 | ENSMUST00000021685 |
| A_51_P337608  | <b>Hifta</b>    | hypoxia inducible factor 1, alpha subunit                        | 1.23 | 2.34 | 3.19E-05 | 7.25E-04 | NM_010431   | NM_010431   | NM_010431   | Mm.3879   | 15251  | ENSMUST00000021530 |
| A_51_P166023  | <b>Hip1</b>     | huntingtin interacting protein 1                                 | 0.90 | 1.86 | 3.18E-06 | 1.86E-04 | NM_146001   | NM_146001   | NM_146001   | Mm.280805 | 215114 | ENSMUST00000060311 |
| A_51_P440460  | <b>Hip1r</b>    | huntingtin interacting protein 1 related                         | 1.12 | 2.18 | 4.90E-07 | 7.25E-05 | NM_145070   | NM_145070   | NM_145070   | Mm.149954 | 29816  | ENSMUST00000009039 |
| A_51_P2091861 | <b>Hipk2</b>    | homeodomain interacting protein kinase 2                         | 0.87 | 1.82 | 1.13E-04 | 1.64E-03 | NM_00113606 | NM_00113606 | NM_00113606 | Mm.23790  | 15258  | ENSMUST00000114855 |
| A_51_P2218843 | <b>Hkl1</b>     | hexokinase 1                                                     | 1.36 | 2.56 | 2.10E-05 | 6.69E-04 | NM_00114610 | NM_00114610 | NM_00114610 | Mm.196605 | 15275  | ENSMUST00000072357 |
| A_51_P204080  | <b>Hk2</b>      | hexokinase 2                                                     | 0.57 | 1.49 | 4.37E-05 | 8.84E-04 | NM_013820   | NM_013820   | NM_013820   | Mm.255848 | 15277  | ENSMUST00000168725 |
| A_51_P532033  | <b>Hlif</b>     | helicase-like transcription factor                               | 1.08 | 2.11 | 9.13E-07 | 9.69E-05 | NM_009210   | NM_009210   | NM_009210   | Mm.209650 | 20585  | ENSMUST00000145853 |
| A_51_P137371  | <b>Hmgcr</b>    | 3-hydroxy-3-methylglutaryl-Coenzyme A reductase                  | 1.59 | 3.00 | 2.35E-06 | 1.56E-04 | NM_008255   | NM_008255   | NM_008255   | Mm.316652 | 15357  | ENSMUST00000022176 |
| A_51_P08022   | <b>Hnmpk</b>    | heterogeneous nuclear ribonucleoprotein K                        | 1.03 | 2.05 | 2.21E-05 | 5.85E-04 | ENSMUST0000 | AK207611    | NM_142872   | Mm.334464 | 320191 | ENSMUST00000176359 |
| A_51_P176387  | <b>Hook3</b>    | hook homolog 3 (Drosophila)                                      | 0.95 | 1.93 | 5.52E-05 | 1.03E-03 | NM_207659   | NM_207659   | NM_207659   | Mm.334464 | 320191 | ENSMUST00000037182 |
| A_51_P243599  | <b>Hsd17b12</b> | hydroxysteroid (17-beta) dehydrogenase 12                        | 1.27 | 2.42 | 5.04E-06 | 2.44E-04 | NM_019657   | NM_019657   | NM_019657   | Mm.489651 | 15348  | ENSMUST00000146580 |
| A_51_P445662  | <b>Hsd17b4</b>  | hydroxysteroid (17-beta) dehydrogenase 4                         | 1.61 | 3.05 | 7.12E-08 | 2.82E-05 | NM_008292   | NM_008292   | NM_008292   | Mm.277857 | 15648  | ENSMUST00000025385 |
| A_51_P153557  | <b>Hspa12a</b>  | heat shock protein 12A                                           | 1.18 | 2.26 | 8.69E-05 | 1.38E-03 | NM_175199   | NM_175199   | NM_175199   | Mm.39739  | 73442  | ENSMUST00000066285 |
| A_51_P2080151 | <b>Hspa2</b>    | heat shock protein 2                                             | 0.99 | 1.99 | 1.12E-05 | 3.91E-04 | NM_008301   | NM_008301   | NM_008301   | Mm.296181 | 15512  | ENSMUST00000080449 |
| A_51_P2054157 | <b>Hspa4</b>    | heat shock protein 4                                             | 0.96 | 1.94 | 4.11E-06 | 2.16E-04 | NM_008300   | NM_008300   | NM_008300   | Mm.239865 | 15525  | ENSMUST00000020630 |
| A_51_P2173737 | <b>Hspa4l</b>   | heat shock protein 4 like                                        | 0.73 | 1.66 | 1.22E-04 | 1.73E-03 | NM_011020   | NM_011020   | NM_011020   | Mm.39330  | 18415  | ENSMUST00000077083 |
| A_51_P195648  | <b>Hspg2</b>    | heparan (heparan sulfate proteoglycan 2)                         | 1.54 | 2.90 | 4.07E-06 | 2.15E-04 | NM_008305   | NM_008305   | NM_008305   | Mm.273662 | 15530  | ENSMUST00000155648 |
| A_51_P2003513 | <b>Hsp1h</b>    | heat shock 105kDa/110kDa protein 1                               | 1.75 | 3.37 | 4.61E-08 | 2.71E-05 | NM_013559   | NM_013559   | NM_013559   | Mm.270681 | 15505  | ENSMUST00000076410 |
| A_51_P120995  | <b>Htr2a</b>    | 5-hydroxytryptamine (serotonin) receptor 2A                      | 0.82 | 1.76 | 7.26E-05 | 1.22E-03 | NM_172812   | NM_172812   | NM_172812   | Mm.214351 | 15558  | ENSMUST00000036653 |
| A_51_P1977503 | <b>Htr2c</b>    | 5-hydroxytryptamine (serotonin) receptor 2C                      | 1.20 | 2.30 | 6.98E-07 | 8.61E-05 | NM_008312   | NM_008312   | NM_008312   | Mm.439670 | 15560  | ENSMUST00000036303 |
| A_51_P581594  | <b>Htr4</b>     | 5-hydroxytryptamine (serotonin) receptor 4                       | 1.10 | 2.15 | 5.95E-06 | 2.72E-04 | NM_008313   | NM_008313   | NM_008313   | Mm.20440  | 15562  | ENSMUST00000027560 |
| A_51_P322115  | <b>Htr5b</b>    | 5-hydroxytryptamine (serotonin) receptor 5B                      | 0.82 | 1.76 | 3.21E-05 | 7.27E-04 | NM_010483   | NM_010483   | NM_010483   | Mm.4833   | 15564  | ENSMUST00000055884 |
| A_51_P225224  | <b>Htra1</b>    | HtrA serine peptidase 1                                          | 0.70 | 1.62 | 3.91E-05 | 8.19E-04 | NM_019564   | NM_019564   | NM_019564   | Mm.30156  | 56213  | ENSMUST00000006367 |
| A_51_P2088530 | <b>Htt</b>      | huntingtin                                                       | 1.10 | 2.15 | 1.96E-06 | 1.40E-04 | NM_010414   | NM_010414   | NM_010414   | Mm.209071 | 15194  | ENSMUST00000080306 |
| A_51_P200617  | <b>Iars</b>     | isoleucine-tRNA synthetase                                       | 1.29 | 2.44 | 2.66E-06 | 1.66E-04 | NM_172015   | NM_172015   | NM_172015   | Mm.21118  | 105148 | ENSMUST00000165316 |
| A_51_P613241  | <b>Icam1</b>    | intercellular adhesion molecule 1                                | 0.70 | 1.63 | 2.02E-05 | 5.55E-04 | NM_010493   | NM_010493   | NM_010493   | Mm.435508 | 15894  | ENSMUST00000086399 |
| A_51_P132978  | <b>Icdh1</b>    | isocitrate dehydrogenase 1 (NADP+), soluble                      | 1.16 | 2.23 | 1.87E-05 | 5.28E-04 | NM_010497   | NM_010497   | NM_010497   | Mm.9925   | 15926  | ENSMUST00000169032 |
| A_51_P130110  | <b>Icdh3b</b>   | isocitrate dehydrogenase 3 (NAD+) beta                           | 0.64 | 1.56 | 1.07E-04 | 1.58E-03 | NM_130884   | NM_130884   | NM_130884   | Mm.29590  | 170718 | ENSMUST00000028892 |
| A_51_P221856  | <b>Ier5l</b>    | immediate early response 5-like                                  | 0.56 | 1.48 | 1.08E-04 | 1.59E-03 | NM_030244   | NM_030244   | NM_030244   | Mm.295464 | 72500  | 0                  |
| A_51_P2009187 | <b>Iifo1</b>    | intermediate filament family orphan 1                            | 0.55 | 1.57 | 1.35E-05 | 4.36E-04 | NM_00103966 | NM_00103966 | NM_00103966 | Mm.129415 | 320678 | ENSMUST00000117675 |
| A_51_P490305  | <b>Iifo30</b>   | interferon gamma inducible protein 30                            | 0.80 | 1.74 | 2.20E-05 | 5.84E-04 | NM_023065   | NM_023065   | NM_023065   | Mm.20411  | 65972  | ENSMUST00000034299 |
| A_51_P190405  | <b>Iifar2</b>   | interferon (alpha and beta) receptor 2                           | 0.88 | 1.84 | 1.51E-04 | 1.98E-03 | NM_010509   | NM_010509   | NM_010509   | Mm.6834   | 15976  | ENSMUST00000117836 |
| A_51_P456857  | <b>Iift122</b>  | intracellular transport 122                                      | 0.76 | 1.69 | 8.98E-05 | 1.41E-03 | NM_031177   | NM_031177   | NM_031177   | Mm.333335 | 18196  | ENSMUST00000036234 |
| A_51_P330144  | <b>Iift140</b>  | intracellular transport 140                                      | 1.19 | 2.27 | 1.47E-05 | 4.60E-04 | NM_134126   | NM_134126   | NM_134126   | Mm.32802  | 106633 | ENSMUST00000013786 |
| A_51_P509906  | <b>Iift172</b>  | intracellular transport 172                                      | 1.97 | 3.93 | 1.56E-08 | 1.37E-05 | NM_026298   | NM_026298   | NM_026298   | Mm.293023 | 67661  | ENSMUST00000041565 |
| A_51_P459929  | <b>Iift81</b>   | intracellular transport 81                                       | 0.71 | 1.63 | 4.20E-05 | 8.59E-04 | NM_009879   | NM_009879   | NM_009879   | Mm.10125  | 12589  | ENSMUST00000135956 |
| A_51_P125467  | <b>Iif2r</b>    | insulin-like growth factor 2 receptor                            | 1.00 | 2.00 | 1.54E-05 | 4.72E-04 | NM_010515   | NM_010515   | NM_010515   | Mm.26553  | 16004  | ENSMUST00000024599 |
| A_51_P2018611 | <b>Iigfbp7</b>  | insulin-like growth factor binding protein 7                     | 0.92 | 1.89 | 1.00E-05 | 3.68E-04 | NM_00115951 | NM_00115951 | NM_00115951 | Mm.233470 | 29817  | ENSMUST00000163898 |
| A_51_P1975396 | <b>Iighmp2</b>  | immunoglobulin mu binding protein 2                              | 0.67 | 1.59 | 6.71E-05 | 1.16E-03 | NM_009212   | NM_009212   | NM_009212   | Mm.3179   | 20589  | ENSMUST00000025751 |
| A_51_P509864  | <b>Iigsf1</b>   | immunoglobulin superfamily, member 1                             | 1.25 | 2.38 | 1.71E-06 | 1.30E-04 | NM_177591   | NM_177591   | NM_177591   | Mm.110505 | 209268 | ENSMUST00000033442 |
| A_51_P2157902 | <b>Iigsf10</b>  | immunoglobulin superfamily, member 10                            | 0.97 | 1.96 | 2.11E-05 | 5.70E-04 | NM_00116288 | NM_00116288 | NM_00116288 | Mm.228086 | 240250 | ENSMUST00000039419 |
| A_51_P327632  | <b>Iigsf3</b>   | immunoglobulin superfamily, member 3                             | 0.65 | 1.57 | 1.14E-04 | 1.66E-03 | NM_207205   | NM_207205   | NM_207205   | Mm.489667 | 78908  | ENSMUST00000043983 |
| A_51_P231687  | <b>Ik</b>       | IK cytokine                                                      | 0.78 | 1.72 | 2.79E-05 | 6.69E-04 | NM_011879   | NM_011879   | NM_011879   | Mm.30234  | 24010  | ENSMUST0000007042  |
| A_51_P114878  | <b>Ikbkap</b>   | inhibitor of kappa light polypeptide enhancer in B cells, kinase | 1.02 | 2.02 | 5.49E-06 | 2.58E-04 | NM_026079   | NM_026079   | NM_026079   | Mm.282743 | 203233 | ENSMUST00000150002 |
| A_51_P1970489 | <b>Ilf2rb2</b>  | interleukin 12 receptor, beta 2                                  | 1.29 | 2.44 | 1.69E-06 | 1.30E-04 | NM_008354   | NM_008354   | NM_008354   | Mm.188337 | 16162  | ENSMUST00000018485 |
| A_51_P2030552 | <b>Ilf1f10</b>  | interleukin 1 family, member 10                                  | 0.73 | 1.66 | 6.89E-06 | 2.95E-04 | NM_153077   | NM_153077   | NM_153077   | Mm.218750 | 215274 | ENSMUST00000080566 |
| A_51_P113749  | <b>Ilf2rg</b>   | interleukin 2 receptor, gamma chain                              | 0.69 | 1.62 | 7.91E-05 | 1.29E-03 | NM_013563   | NM_013563   | NM_013563   | Mm.2923   | 16186  | ENSMUST00000033664 |
| A_51_P473888  | <b>Ilf6st</b>   | interleukin 6 signal transducer                                  | 0.76 | 1.70 | 6.21E-05 | 1.11E-03 | NM_010560   | NM_010560   | NM_010560   | Mm.4364   | 16195  | ENSMUST00000070731 |
| A_51_P117109  | <b>Ilvb1</b>    | ilvB (bacterial acetylactate synthase)-like                      | 0.96 | 1.95 | 1.59E-05 | 4.81E-04 | NM_173751   | NM_173751   | NM_173751   | Mm.2644   | 261136 | ENSMUST00000105384 |
| A_51_P458852  | <b>Ina</b>      | interneuron neuronal intermediate filament protein, alpha        | 0.92 | 1.90 | 7.43E-05 | 1.24E-03 | ENSMUST0000 | BU053129    | NM_414453   | Mm.226180 | 226180 | ENSMUST00000037636 |
| A_51_P202054  | <b>Incentp</b>  | inner centromere protein                                         | 0.92 | 1.92 | 3.66E-05 | 7.85E-04 | NM_016692   | NM_016692   | NM_016692   | Mm.29755  | 16319  | ENSMUST00000025562 |
| A_51_P239750  | <b>Inhba</b>    | inhibin beta-A                                                   | 0.86 | 1.82 | 4.30E-05 | 8.74E-04 | NM_008380   | NM_008380   | NM_008380   | Mm.8042   | 16323  | ENSMUST00000042603 |
| A_51_P104554  | <b>Inpp1</b>    | inositol polyphosphate-1-phosphatase                             | 0.61 | 1.53 | 1.16E-04 | 1.67E-03 | NM_008384   | NM_008384   | NM_008384   | Mm.9117   | 16329  | ENSMUST00000177279 |
| A_51_P2129826 | <b>Inpp5f</b>   | inositol polyphosphate-5-phosphatase F                           | 0.76 | 1.62 | 1.09E-04 | 1.60E-03 | NM_178641   | NM_178641   | NM_178641   | Mm.490344 | 101490 | ENSMUST00000029085 |
| A_51_P439452  | <b>Insig2</b>   | insulin induced gene 2                                           | 1.06 | 2.08 | 3.98E-06 | 3.55E-04 | NM_133748   | NM_133748   | NM_133748   | Mm.27136  | 76399  | ENSMUST00000003818 |
| A_51_P2172566 | <b>Insr</b>     | insulin receptor                                                 | 1.30 | 2.46 | 3.94E-07 | 6.55E-05 | NM_010568   | NM_010568   | NM_010568   | Mm.268003 | 12357  | ENSMUST00000091291 |
| A_51_P295708  | <b>Ints1</b>    | integrator complex subunit 1                                     | 1.31 | 2.48 | 4.78E-06 | 2.36E-04 | NM_026748   | NM_026748   | NM_026748   | Mm.292942 | 68510  | ENSMUST00000072607 |
| A_51_P284793  | <b>Ints12</b>   | integrator complex subunit 12                                    | 1.43 | 2.69 | 2.05E-06 | 1.44E-04 | NM_027927   | NM_027927   | NM_027927   | Mm.246726 | 71793  | ENSMUST00000029650 |
| A_51_P2254276 | <b>Ints2</b>    | integrator complex subunit 2                                     | 1.41 | 2.66 | 1.21E-06 | 1.10E-04 | NM_027421   | NM_027421   | NM_027421   | Mm.440906 | 70422  | ENSMUST00000134883 |
| A_51_P121252  | <b>Ints4</b>    | integrator complex subunit 4                                     | 1.75 | 3.36 | 5.21E-08 | 2.43E-05 | NM_002756   | NM_002756   | NM_002756   | Mm.27383  | 10861  | ENSMUST00000052126 |
| A_51_P103718  | <b>Ipk6k1</b>   | inositol hexaphosphate kinase 1                                  | 0.65 | 1.57 | 1.37E-04 | 1.86E-03 | NM_013785   | NM_013785   | NM_013785   | Mm.276155 | 27399  | ENSMUST00000035214 |
| A_51_P588881  | <b>Iqgap3</b>   | IQ motif containing GTPase activating protein 3                  | 1.42 | 2.68 | 3.13E-07 | 6.03E-05 | NM_00103348 | NM_00103348 | NM_00103348 | Mm.31133  | 404710 | ENSMUST00000071812 |
| A_51_P2052416 | <b>Iqsec1</b>   | IQ motif and Sec7 domain 1                                       | 0.77 | 1.70 | 1.44E-04 | 1.93E-03 | NM_00113438 | NM_00113438 | NM_00113438 | Mm.196943 | 232227 | ENSMUST00000101151 |
| A_51_P175242  | <b>Irs1</b>     | insulin receptor substrate 1                                     | 0.76 |      |          |          |             |             |             |           |        |                    |

|                |                  |                                                                  |      |       |          |          |             |             |             |           |        |                     |
|----------------|------------------|------------------------------------------------------------------|------|-------|----------|----------|-------------|-------------|-------------|-----------|--------|---------------------|
| A_51_P316553   | <b>Kdr</b>       | kinase insert domain protein receptor                            | 1,15 | 2,22  | 6,41E-04 | 2,85E-04 | NM_010612   | NM_010612   | NM_010612   | Mm.285    | 16542  | ENSMUST00000113516  |
| A_52_P641849   | <b>Khynn</b>     | KH and NYN domain containing                                     | 0,80 | 1,74  | 4,91E-05 | 9,55E-04 | NM_027143   | NM_027143   | NM_027143   | Mm.490360 | 219094 | ENSMUST00000202831  |
| A_55_P20282748 | <b>Kidins220</b> | kinase D-interacting substrate 220                               | 1,26 | 2,40  | 1,36E-06 | 1,17E-04 | NM_00108137 | NM_00108137 | NM_00108137 | Mm.250641 | 17480  | ENSMUST00000066652  |
| A_55_P2032449  | <b>Kifta</b>     | kinasin family member 1A                                         | 1,22 | 2,33  | 2,27E-06 | 1,52E-04 | NM_008440   | NM_008440   | NM_008440   | Mm.276408 | 67560  | ENSMUST0000012958   |
| A_55_P2058933  | <b>Kiftb</b>     | kinasin family member 1B                                         | 1,16 | 2,24  | 8,66E-05 | 1,38E-03 | NM_207682   | NM_207682   | NM_207682   | Mm.402933 | 16561  | ENSMUST00000060537  |
| A_51_P324287   | <b>Kif23</b>     | kinasin family member 23                                         | 1,17 | 2,26  | 9,95E-07 | 9,95E-05 | NM_024245   | NM_024245   | NM_024245   | Mm.259374 | 71879  | ENSMUST00000034815  |
| A_55_P2085556  | <b>Kif26a</b>    | kinasin family member 26A                                        | 0,75 | 1,68  | 3,09E-05 | 7,10E-04 | NM_00109762 | NM_00109762 | NM_00109762 | Mm.313104 | 668303 | ENSMUST00000128402  |
| A_51_P179258   | <b>Kif26b</b>    | kinasin family member 26B                                        | 0,92 | 1,90  | 6,70E-06 | 2,91E-04 | NM_00116166 | NM_00116166 | NM_00116166 | Mm.138659 | 269152 | ENSMUST00000161017  |
| A_51_P254805   | <b>Kif4</b>      | kinasin family member 4                                          | 0,81 | 1,75  | 1,37E-04 | 1,86E-03 | NM_008446   | NM_008446   | NM_008446   | Mm.383091 | 16571  | ENSMUST00000048962  |
| A_51_P107020   | <b>Kif5a</b>     | kinasin family member 5A                                         | 1,94 | 3,83  | 1,08E-06 | 1,03E-04 | NM_00103900 | NM_00103900 | NM_00103900 | Mm.30355  | 16572  | ENSMUST00000099172  |
| A_55_P2037478  | <b>Kifap3</b>    | kinasin-associated protein 3                                     | 0,90 | 1,86  | 1,79E-05 | 5,15E-04 | NM_010629   | NM_010629   | NM_010629   | Mm.4651   | 16579  | ENSMUST00000077642  |
| A_51_P114237   | <b>Kifc3</b>     | kinasin family member C3                                         | 0,75 | 1,69  | 4,08E-06 | 2,16E-04 | NM_010631   | NM_010631   | NM_010631   | Mm.378951 | 16582  | ENSMUST00000169748  |
| A_55_P128434   | <b>Kit</b>       | kit oncogene                                                     | 0,82 | 1,76  | 9,76E-06 | 3,63E-04 | NM_00112273 | NM_00112273 | NM_00112273 | Mm.247073 | 16590  | ENSMUST00000144270  |
| A_52_P420663   | <b>Kih11</b>     | kelch-like 11                                                    | 0,90 | 1,87  | 6,67E-06 | 2,90E-04 | NM_172565   | NM_172565   | NM_172565   | Mm.183320 | 217194 | ENSMUST00000056665  |
| A_55_P2455725  | <b>Kihl20</b>    | kelch-like 20                                                    | 1,11 | 2,15  | 8,32E-07 | 9,30E-05 | NM_00103948 | NM_00103948 | NM_00103948 | Mm.255165 | 226541 | ENSMUST00000117467  |
| A_55_P2005285  | <b>Kihl22</b>    | kelch-like 22                                                    | 0,84 | 1,80  | 5,98E-06 | 2,73E-04 | NM_145479   | NM_145479   | NM_145479   | Mm.282807 | 224023 | ENSMUST00000117192  |
| A_55_P1962284  | <b>Kihl24</b>    | kelch-like 24                                                    | 1,09 | 2,13  | 4,58E-06 | 2,30E-04 | NM_029436   | NM_029436   | NM_029436   | Mm.485857 | 57583  | ENSMUST00000023509  |
| A_66_P111385   | <b>Kihl28</b>    | kelch-like 28                                                    | 0,88 | 1,84  | 1,01E-05 | 5,19E-04 | NM_025707   | NM_025707   | NM_025707   | Mm.248678 | 66689  | ENSMUST00000021331  |
| A_55_P1981949  | <b>Kihl5</b>     | kelch-like 5                                                     | 0,62 | 1,53  | 4,04E-05 | 8,38E-04 | NM_175174   | NM_175174   | NM_175174   | Mm.10281  | 71778  | ENSMUST00000126692  |
| A_51_P423008   | <b>Kihl7</b>     | kelch-like 7                                                     | 0,96 | 1,94  | 1,19E-04 | 1,69E-03 | NM_026448   | NM_026448   | NM_026448   | Mm.273768 | 52323  | ENSMUST00000030841  |
| A_55_P2154714  | <b>Kihl9</b>     | kelch-like 9                                                     | 0,95 | 1,94  | 1,36E-04 | 1,86E-03 | NM_172871   | NM_172871   | NM_172871   | Mm.260601 | 242521 | ENSMUST00000094993  |
| A_51_P176474   | <b>Kndc1</b>     | kinase non-catalytic C-lobe domain (KIND) containing 1           | 1,25 | 2,38  | 1,03E-05 | 3,73E-04 | NM_177261   | NM_177261   | NM_177261   | Mm.44442  | 76484  | ENSMUST00000053445  |
| A_55_P2078459  | <b>Kpna2</b>     | karyopherin (importin) alpha 2                                   | 1,02 | 2,03  | 4,76E-05 | 9,39E-04 | NM_010655   | NM_010655   | NM_010655   | Mm.12508  | 16647  | ENSMUST00000086423  |
| A_55_P2067895  | <b>Krba1</b>     | KRAB-A domain containing 1                                       | 0,72 | 1,65  | 8,05E-06 | 3,24E-04 | NM_133922   | NM_133922   | NM_133922   | Mm.107646 | 77827  | ENSMUST00000114572  |
| A_55_P2070940  | <b>Krtap20-2</b> | keratin associated protein 20-2                                  | 0,80 | 1,74  | 9,39E-05 | 1,45E-03 | NM_00116361 | NM_00116361 | NM_00116361 | Mm.459837 | 622935 | ENSMUST00000169954  |
| A_66_P135018   | <b>Krtap5-1</b>  | keratin associated protein 5-1                                   | 0,59 | 1,51  | 1,25E-04 | 1,75E-03 | NM_015808   | NM_015808   | NM_015808   | Mm.389993 | 50774  | ENSMUST00000106074  |
| A_55_P2065199  | <b>Krtap9-5</b>  | keratin associated protein 9-5                                   | 0,63 | 1,55  | 2,50E-05 | 6,26E-04 | NM_00108552 | NM_00108552 | NM_00108552 | Mm.457964 | 435286 | ENSMUST00000105052  |
| A_55_P2102857  | <b>Krtcap3</b>   | keratinocyte associated protein 3                                | 1,20 | 2,30  | 4,13E-06 | 2,16E-04 | NM_027221   | NM_027221   | NM_027221   | Mm.386909 | 69815  | ENSMUST00000054829  |
| A_55_P2008681  | <b>Ktn1</b>      | kinectin 1                                                       | 1,46 | 2,75  | 4,34E-08 | 2,20E-05 | NM_008477   | NM_008477   | NM_008477   | Mm.31110  | 16709  | ENSMUST00000022391  |
| A_55_P1967659  | <b>Lactb</b>     | lactamase, beta                                                  | 0,80 | 1,74  | 6,43E-06 | 2,85E-04 | NM_030717   | NM_030717   | NM_030717   | Mm.157882 | 80907  | ENSMUST00000034929  |
| A_51_P418908   | <b>Larp1</b>     | La ribonucleoprotein domain family, member 1                     | 0,75 | 1,69  | 7,00E-05 | 1,19E-03 | NM_028451   | NM_028451   | NM_028451   | Mm.248843 | 43158  | ENSMUST00000071487  |
| A_52_P239726   | <b>Larp4</b>     | La ribonucleoprotein domain family, member 4                     | 1,00 | 2,00  | 2,28E-05 | 5,90E-04 | NM_00108094 | NM_00108094 | NM_00108094 | Mm.28811  | 207214 | ENSMUST00000057632  |
| A_52_P500488   | <b>Lars1</b>     | leucyl-tRNA synthetase                                           | 0,98 | 1,97  | 4,97E-06 | 2,42E-04 | NM_134137   | NM_134137   | NM_134137   | Mm.312170 | 107045 | ENSMUST00000097590  |
| A_55_P1957227  | <b>Last1</b>     | LAS1-like (S. cerevisiae)                                        | 0,90 | 1,87  | 8,41E-06 | 3,32E-04 | NM_152822   | NM_152822   | NM_152822   | Mm.274318 | 76130  | ENSMUST00000079987  |
| A_52_P667287   | <b>Lass6</b>     | LAG1 homologue, ceramide synthase 6                              | 1,16 | 2,24  | 3,57E-05 | 7,74E-04 | NM_172856   | NM_172856   | NM_172856   | Mm.22222  | 241447 | ENSMUST00000028426  |
| A_51_P201137   | <b>Lbr</b>       | lamin B receptor                                                 | 1,00 | 1,99  | 1,02E-05 | 3,71E-04 | NM_133815   | NM_133815   | NM_133815   | Mm.4538   | 98386  | ENSMUST00000005003  |
| A_52_P299358   | <b>Lclat1</b>    | lysocardiolipin acyltransferase 1                                | 0,94 | 1,92  | 6,26E-06 | 2,81E-04 | NM_00108107 | NM_00108107 | NM_00108107 | Mm.321994 | 225010 | ENSMUST00000067545  |
| A_52_P67983    | <b>Lcmt2</b>     | lecucine carboxyl methyltransferase 2                            | 0,69 | 1,61  | 8,31E-05 | 1,34E-03 | NM_177846   | NM_177846   | NM_177846   | Mm.219499 | 329504 | ENSMUST00000099486  |
| A_52_P56751    | <b>Lcp1</b>      | lymphocyte cytosolic protein 1                                   | 1,56 | 2,94  | 7,29E-07 | 8,76E-05 | NM_008879   | NM_008879   | NM_008879   | Mm.153911 | 18628  | ENSMUST00000131862  |
| A_55_P2141876  | <b>Ldha</b>      | lactate dehydrogenase A                                          | 0,76 | 1,70  | 3,28E-05 | 7,36E-04 | NM_00113606 | NM_00113606 | NM_00113606 | Mm.29324  | 18826  | ENSMUST00000125802  |
| A_51_P444645   | <b>Lect1</b>     | leukocyte cell derived chemotaxin 1                              | 1,26 | 2,40  | 1,24E-05 | 4,12E-04 | NM_010701   | NM_010701   | NM_010701   | Mm.46561  | 16840  | ENSMUST00000022603  |
| A_55_P2177910  | <b>Lepr</b>      | leptin receptor                                                  | 0,96 | 1,94  | 4,13E-05 | 8,50E-04 | NM_010704   | NM_010704   | NM_010704   | Mm.259282 | 16847  | ENSMUST00000156402  |
| A_52_P609695   | <b>Lgi1</b>      | lecucine-rich repeat LGI family, member 1                        | 1,40 | 2,63  | 2,94E-06 | 1,78E-04 | NM_020278   | NM_020278   | NM_020278   | Mm.298251 | 56839  | ENSMUST00000087252  |
| A_55_P2179453  | <b>Lig3</b>      | ligase III, DNA, ATP-dependent                                   | 0,78 | 1,71  | 5,05E-05 | 9,71E-04 | NM_010716   | NM_010716   | NM_010716   | Mm.271736 | 16882  | ENSMUST00000084061  |
| A_65_P01834    | <b>Lima1</b>     | LIM domain and actin binding 1                                   | 2,78 | 6,89  | 3,92E-09 | 7,48E-06 | NM_00111354 | NM_00111354 | NM_00111354 | Mm.33207  | 65970  | ENSMUST00000109024  |
| A_55_P2023727  | <b>Limch1</b>    | LIM and calponin homology domains 1                              | 3,98 | 15,81 | 1,53E-10 | 3,00E-06 | NM_00100198 | NM_00100198 | NM_00100198 | Mm.481371 | 77569  | ENSMUST000000038188 |
| A_55_P2085641  | <b>Lmbr1</b>     | limb region 1 like                                               | 0,56 | 1,48  | 8,18E-05 | 1,32E-03 | NM_029098   | NM_029098   | NM_029098   | Mm.385020 | 74775  | ENSMUST00000109127  |
| A_55_P2123942  | <b>Lmbrd1</b>    | LMBR1 domain containing 1                                        | 0,55 | 1,47  | 8,57E-05 | 1,36E-03 | NM_026719   | NM_026719   | NM_026719   | Mm.336563 | 68421  | ENSMUST00000095062  |
| A_55_P1985273  | <b>Lmcd1</b>     | LIM and cysteine-rich domains 1                                  | 0,86 | 1,81  | 1,52E-04 | 1,99E-03 | NM_144799   | NM_144799   | NM_144799   | Mm.234441 | 30937  | ENSMUST00000032376  |
| A_55_P2177988  | <b>Lmf1</b>      | lipase maturation factor 1                                       | 0,80 | 1,74  | 6,75E-06 | 3,13E-04 | NM_029624   | NM_029624   | NM_029624   | Mm.12787  | 76483  | ENSMUST00000156868  |
| A_52_P54261    | <b>Lmf2</b>      | lipase maturation factor 2                                       | 0,48 | 1,40  | 1,42E-04 | 1,91E-03 | NM_178919   | NM_178919   | NM_178919   | Mm.34511  | 105847 | ENSMUST00000023283  |
| A_55_P2110512  | <b>Lmo7</b>      | LIM domain only 7                                                | 2,95 | 7,71  | 2,35E-09 | 5,69E-06 | NM_201529   | NM_201529   | NM_201529   | Mm.486662 | 380928 | ENSMUST00000160338  |
| A_52_P445474   | <b>Lmk2</b>      | lemur tyrosine kinase 2                                          | 2,00 | 4,01  | 1,68E-05 | 4,91E-04 | NM_00108110 | NM_00108110 | NM_00108110 | Mm.288726 | 231876 | ENSMUST00000041804  |
| A_55_P1976200  | <b>Lmk3</b>      | lemur tyrosine kinase 3                                          | 1,51 | 2,85  | 1,98E-07 | 4,65E-05 | NM_00100551 | NM_00100551 | NM_00100551 | Mm.44928  | 381983 | ENSMUST00000120005  |
| A_55_P1995233  | <b>Lonp2</b>     | ion peptidase 2, peroxisomal                                     | 1,57 | 2,96  | 4,52E-07 | 7,01E-05 | NM_025827   | NM_025827   | NM_025827   | Mm.324550 | 66887  | ENSMUST00000034141  |
| A_55_P2115008  | <b>Lonr2</b>     | LON peptidase N-terminal domain and ring finger 2                | 1,10 | 2,15  | 2,18E-06 | 1,49E-04 | NM_00102987 | NM_00102987 | NM_00102987 | Mm.487137 | 381338 | ENSMUST00000039612  |
| A_55_P2013019  | <b>Lpar1</b>     | lysophosphatidic acid receptor 1                                 | 0,92 | 1,89  | 2,19E-06 | 1,49E-04 | NM_172989   | NM_172989   | NM_172989   | Mm.4772   | 14745  | ENSMUST00000107571  |
| A_51_P145415   | <b>Lpcat3</b>    | lysophosphatidylcholine acyltransferase 3                        | 1,20 | 2,29  | 3,06E-05 | 7,08E-04 | NM_145130   | NM_145130   | NM_145130   | Mm.273915 | 14792  | ENSMUST00000130020  |
| A_51_P453351   | <b>Lpgat1</b>    | lysophosphatidylglycerol acyltransferase 1                       | 0,89 | 1,85  | 4,49E-06 | 2,27E-04 | NM_172266   | NM_172266   | NM_172266   | Mm.277958 | 226886 | ENSMUST00000110855  |
| A_55_P2040200  | <b>Lrba</b>      | LPS-responsive beige-like anchor                                 | 0,74 | 1,67  | 3,89E-06 | 2,10E-04 | NM_030695   | NM_030695   | NM_030695   | Mm.439825 | 80877  | ENSMUST00000107635  |
| A_55_P2400322  | <b>Lrch2</b>     | lecucine-rich repeats and calponin homology (CH) domain cont     | 0,75 | 1,67  | 4,39E-05 | 8,86E-04 | NM_00108117 | NM_00108117 | NM_00108117 | Mm.30960  | 210297 | ENSMUST00000112819  |
| A_51_P295237   | <b>Lrp11</b>     | low density lipoprotein receptor-related protein 11              | 0,74 | 1,67  | 1,74E-05 | 5,06E-04 | NM_172784   | NM_172784   | NM_172784   | Mm.206759 | 327323 | ENSMUST00000109331  |
| A_51_P476428   | <b>Lrp1b</b>     | low density lipoprotein-related protein 1B (deleted in tumors)   | 0,95 | 1,94  | 7,22E-06 | 3,03E-04 | NM_053011   | NM_053011   | NM_053011   | Mm.441398 | 94217  | ENSMUST00000129974  |
| A_55_P1967168  | <b>Lrp4</b>      | low density lipoprotein receptor-related protein 4               | 1,16 | 2,24  | 1,63E-05 | 4,87E-04 | NM_172668   | NM_172668   | NM_172668   | Mm.275149 | 228357 | ENSMUST00000028689  |
| A_52_P2279687  | <b>Lrp8</b>      | low density lipoprotein receptor-related protein 8, apolipoprote | 0,66 | 1,58  | 2,46E-05 | 6,21E-04 | NM_00108092 | NM_00108092 | NM_00108092 | Mm.442134 | 16975  | ENSMUST00000123140  |
| A_55_P1969845  | <b>Lrpprc</b>    | lecucine-rich PPR-motif containing                               | 1,03 | 2,04  | 3,99E-06 | 2,13E-04 | NM_028233   | NM_028233   | NM_028233   | Mm.217027 | 72416  | ENSMUST00000112308  |
| A_52_P11402    | <b>Lrc24</b>     | lecucine rich repeat containing 24                               | 0,80 | 1,74  | 5,51E-05 | 1,03E-03 | NM_198119   | NM_198119   | NM_198119   | Mm.289666 | 378937 | ENSMUST00000049956  |
| A_51_P362089   | <b>Lrc3b</b>     | lecucine rich repeat containing 3B                               | 0,69 | 1,61  | 9,93E-05 | 1,51E-03 | NM_146052   | NM_146052   | NM_146052   | Mm.138039 | 218763 | ENSMUST00000163937  |
| A_52_P365660   | <b>Lrc4c</b>     | lecucine rich repeat containing 4C                               | 0,59 | 1,51  | 6,59E-05 | 1,15E-03 | NM_178725   | NM_178725   | NM_178725   | Mm.241682 | 241568 | ENSMUST00000162807  |
| A_55_P2125564  | <b>Lrc58</b>     | lecucine rich repeat containing 58                               | 0,82 | 1,77  | 5,99E-05 | 1,08E-03 | NM_177093   | NM_177093   | NM_177093   | Mm.390882 | 320184 | ENSMUST00000078717  |
| A_51_P485472   | <b>Lrc71</b>     | lecucine rich repeat containing 71                               | 1,94 | 3,84  | 2,28E-08 | 1,66E-05 | NM_028971   | NM_028971   | NM_028971   | Mm.474494 | 74485  | ENSMUST00000023846  |
| A_55_P1984006  | <b>Lrk2</b>      | lecucine-rich repeat kinase 2                                    | 0,52 | 1,44  | 1,44E-04 | 1,92E-03 | NM_025730   | NM_025730   |             |           |        |                     |



|               |                  |                                                                            |      |       |          |          |             |             |             |           |        |                    |
|---------------|------------------|----------------------------------------------------------------------------|------|-------|----------|----------|-------------|-------------|-------------|-----------|--------|--------------------|
| A_55_P2182134 | <b>Mctp1</b>     | multiple C2 domains, transmembrane 1                                       | 0.95 | 1.93  | 9.76E-06 | 3.63E-04 | NM_030174   | NM_030174   | NM_030174   | Mm.316249 | 78771  | ENSMUST00000109583 |
| A_52_P407796  | <b>Mdh1</b>      | malate dehydrogenase 1, NAD (soluble)                                      | 0.93 | 1.90  | 8.07E-05 | 1.31E-03 | NM_008618   | NM_008618   | NM_008618   | Mm.212703 | 17449  | ENSMUST00000102874 |
| A_55_P2016842 | <b>Me1</b>       | malic enzyme 1, NAD(+)-dependent, cytosolic                                | 0.97 | 1.95  | 6.97E-05 | 1.19E-03 | NM_00119893 | NM_00119893 | NM_00119893 | Mm.148155 | 17436  | ENSMUST00000034989 |
| A_51_P324082  | <b>Med1</b>      | mediator complex subunit 1                                                 | 1.01 | 2.01  | 1.31E-04 | 1.81E-03 | NM_013634   | NM_013634   | NM_013634   | Mm.12926  | 19014  | ENSMUST00000018304 |
| A_66_P136955  | <b>Med14</b>     | mediator complex subunit 14                                                | 1.33 | 2.51  | 5.77E-07 | 7.91E-05 | NM_012005   | NM_012005   | NM_012005   | Mm.17616  | 26896  | ENSMUST00000124053 |
| A_55_P1964568 | <b>Megf10</b>    | multiple EGF-like domains 10                                               | 1.38 | 2.61  | 3.31E-07 | 6.08E-05 | NM_00100197 | NM_00100197 | NM_00100197 | Mm.297863 | 70417  | ENSMUST00000057570 |
| A_51_P124535  | <b>Mest</b>      | mesoderm specific transcript                                               | 1.29 | 2.44  | 4.33E-06 | 2.22E-04 | NM_008590   | NM_008590   | NM_008590   | Mm.336639 | 17294  | ENSMUST00000163949 |
| A_51_P102503  | <b>Metap1</b>    | methionyl aminopeptidase 1                                                 | 0.78 | 1.71  | 3.11E-05 | 7.11E-04 | NM_175224   | NM_175224   | NM_175224   | Mm.26833  | 75624  | ENSMUST00000298004 |
| A_51_P345046  | <b>Metap2</b>    | methionine aminopeptidase 2                                                | 0.93 | 1.90  | 1.67E-05 | 4.93E-04 | NM_019648   | NM_019648   | NM_019648   | Mm.289329 | 56307  | ENSMUST00000180840 |
| A_66_P134412  | <b>Mettl25</b>   | methyltransferase like 25                                                  | 0.86 | 1.82  | 6.05E-05 | 1.09E-03 | NM_207522   | NM_207522   | NM_207522   | Mm.250875 | 216292 | ENSMUST00000176924 |
| A_55_P1961140 | <b>Mettl3</b>    | methyltransferase like 3                                                   | 0.73 | 1.65  | 3.88E-05 | 8.15E-04 | NM_019721   | NM_019721   | NM_019721   | Mm.271759 | 56335  | ENSMUST00000173546 |
| A_66_P133270  | <b>Mfsd1</b>     | major facilitator superfamily domain containing 1                          | 0.83 | 1.78  | 1.22E-05 | 4.10E-04 | NM_025813   | NM_025813   | NM_025813   | Mm.271975 | 66868  | ENSMUST00000023344 |
| A_55_P2452384 | <b>Mga</b>       | MAX gene associated                                                        | 1.20 | 2.30  | 7.29E-06 | 3.05E-04 | NM_013720   | NM_013720   | NM_013720   | Mm.87532  | 29808  | ENSMUST00000046717 |
| A_55_P2130388 | <b>Mical1</b>    | microtubule associated monooxygenase, calponin and LIM domain containing 1 | 2.41 | 5.30  | 2.07E-08 | 1.63E-05 | NM_138315   | NM_138315   | NM_138315   | Mm.290431 | 171580 | ENSMUST00000019967 |
| A_51_P519648  | <b>Mical3</b>    | microtubule associated monooxygenase, calponin and LIM domain containing 3 | 2.07 | 4.20  | 1.53E-07 | 4.22E-05 | NM_153396   | NM_153396   | NM_153396   | Mm.122399 | 194401 | ENSMUST00000077159 |
| A_52_P642207  | <b>Mkrn1</b>     | makorin, ring finger protein, 1                                            | 0.63 | 1.55  | 6.69E-05 | 1.16E-03 | NM_018810   | NM_018810   | NM_018810   | Mm.270484 | 54484  | ENSMUST00000031985 |
| A_51_P427820  | <b>Mlip</b>      | muscular LMNA-interacting protein                                          | 0.89 | 1.85  | 1.17E-05 | 4.00E-04 | AK009836    | 0           | AK009836    | Mm.35008  | 69642  | 0                  |
| A_55_P2185990 | <b>Mll1</b>      | myeloid/lymphoid or mixed-lineage leukemia 1                               | 1.28 | 2.98  | 2.31E-06 | 1.54E-04 | NM_00108104 | NM_00108104 | NM_00108104 | Mm.2389   | 214162 | ENSMUST00000152241 |
| A_55_P2136526 | <b>Mll2</b>      | myeloid/lymphoid or mixed-lineage leukemia 2                               | 1.59 | 2.44  | 4.24E-07 | 6.84E-05 | NM_00103327 | NM_00103327 | NM_00103327 | Mm.264889 | 381022 | ENSMUST00000023741 |
| A_55_P1984123 | <b>Mll3</b>      | myeloid/lymphoid or mixed-lineage leukemia 3                               | 1.23 | 2.35  | 1.80E-07 | 4.47E-05 | NM_00108138 | NM_00108138 | NM_00108138 | Mm.322668 | 231051 | ENSMUST00000174734 |
| A_52_P304128  | <b>Mmp14</b>     | matrix metalloproteinase 14 (membrane-inserted)                            | 0.96 | 1.94  | 6.74E-05 | 1.17E-03 | NM_008608   | NM_008608   | NM_008608   | Mm.280175 | 17387  | ENSMUST00000089688 |
| A_51_P195775  | <b>Mmp16</b>     | matrix metalloproteinase 16                                                | 1.36 | 2.56  | 3.82E-07 | 6.44E-05 | NM_019724   | NM_019724   | NM_019724   | Mm.187315 | 17389  | ENSMUST00000029881 |
| A_51_P341736  | <b>Mmp2</b>      | matrix metalloproteinase 2                                                 | 0.84 | 1.79  | 1.99E-05 | 5.48E-04 | NM_008610   | NM_008610   | NM_008610   | Mm.29564  | 17390  | ENSMUST00000034187 |
| A_51_P414396  | <b>Mmrn2</b>     | multimerin 2                                                               | 0.67 | 1.59  | 1.16E-04 | 1.67E-03 | NM_153127   | NM_153127   | NM_153127   | Mm.272673 | 105450 | ENSMUST00000119108 |
| A_55_P2352896 | <b>Mon2</b>      | MON2 homolog (yeast)                                                       | 1.40 | 2.64  | 7.11E-06 | 3.02E-04 | NM_153395   | NM_153395   | NM_153395   | Mm.169924 | 67074  | ENSMUST00000037557 |
| A_55_P2137887 | <b>Podz</b>      | multiple PDZ domain protein                                                | 1.22 | 2.33  | 1.17E-06 | 1.08E-04 | NM_010820   | NM_010820   | NM_010820   | Mm.153039 | 17475  | ENSMUST00000134726 |
| A_55_P2115127 | <b>Mphosph10</b> | M-phase phosphoprotein 10 (U3 small nuclear ribonucleoprotein A2)          | 1.44 | 2.71  | 6.32E-07 | 8.24E-05 | NM_026483   | NM_026483   | NM_026483   | Mm.26973  | 67973  | ENSMUST00000032735 |
| A_55_P2077746 | <b>Mphosph8</b>  | M-phase phosphoprotein 8                                                   | 0.71 | 1.64  | 3.29E-05 | 7.36E-04 | NM_023773   | NM_023773   | NM_023773   | Mm.152466 | 75339  | ENSMUST00000116468 |
| A_55_P2087520 | <b>Mpp1</b>      | membrane protein, palmitoylated                                            | 0.84 | 1.78  | 4.55E-05 | 9.09E-04 | NM_008621   | NM_008621   | NM_008621   | Mm.391267 | 17524  | ENSMUST00000033775 |
| A_52_P17098   | <b>Mpp7</b>      | membrane protein, palmitoylated 7 (MAGUK p55 subfamily member 7)           | 0.87 | 1.83  | 1.14E-04 | 1.65E-03 | NM_00116162 | NM_00116162 | NM_00116162 | Mm.472923 | 75739  | ENSMUST00000115869 |
| A_55_P1957433 | <b>Mpr1</b>      | myosin phosphatase Rho interacting protein                                 | 3.13 | 8.78  | 1.60E-08 | 1.38E-05 | NM_201245   | NM_201245   | NM_201245   | Mm.290242 | 26936  | ENSMUST00000066330 |
| A_55_P2097038 | <b>Mrc2</b>      | mannose receptor, C type 2                                                 | 1.20 | 2.30  | 1.39E-06 | 1.17E-04 | NM_008626   | NM_008626   | NM_008626   | Mm.236616 | 17534  | ENSMUST00000126931 |
| A_52_P368057  | <b>Mri1</b>      | methylthioinosine-1-phosphate isomerase homolog (S. cerevisiae)            | 0.82 | 1.77  | 3.79E-06 | 2.07E-04 | NM_026423   | NM_026423   | NM_026423   | Mm.278085 | 67873  | ENSMUST00000126435 |
| A_55_P2087885 | <b>Mroh1</b>     | maestro heat-like repeat family member 1                                   | 0.61 | 1.52  | 1.35E-04 | 1.84E-03 | NM_00116248 | NM_00116248 | NM_00116248 | Mm.123240 | 223658 | ENSMUST00000016183 |
| A_51_P405565  | <b>Msh6</b>      | mutS homolog 6 (E. coli)                                                   | 1.27 | 2.41  | 3.69E-07 | 6.32E-05 | NM_010830   | NM_010830   | NM_010830   | Mm.18210  | 17688  | ENSMUST00000055003 |
| A_55_P2022094 | <b>Mta3</b>      | metastasis associated 3                                                    | 0.62 | 1.76  | 3.14E-06 | 1.85E-04 | NM_00117105 | NM_00117105 | NM_00117105 | Mm.27668  | 11671  | ENSMUST00000123500 |
| A_55_P2002080 | <b>Mthfd1l</b>   | methylentetrahydrofolate dehydrogenase (NADP+ dependent)                   | 0.92 | 1.89  | 8.21E-06 | 3.28E-04 | NM_00117078 | NM_00117078 | NM_00117078 | Mm.184752 | 270685 | ENSMUST00000120585 |
| A_55_P2117028 | <b>Mtmr3</b>     | myotubularin related protein 3                                             | 0.50 | 1.41  | 6.84E-05 | 1.18E-03 | NM_028860   | NM_028860   | NM_028860   | Mm.256699 | 74083  | ENSMUST00000123506 |
| A_52_P450188  | <b>Mtmr4</b>     | myotubularin related protein 4                                             | 0.63 | 1.78  | 9.96E-06 | 3.68E-04 | NM_133215   | NM_133215   | NM_133215   | Mm.299376 | 170749 | ENSMUST00000119628 |
| A_55_P2084378 | <b>Mtmr7</b>     | myotubularin related protein 7                                             | 1.26 | 2.40  | 2.15E-06 | 1.47E-04 | NM_00104066 | NM_00104066 | NM_00104066 | Mm.99481  | 54384  | ENSMUST00000048898 |
| A_51_P282179  | <b>Mtor</b>      | mechanistic target of rapamycin (serine/threonine kinase)                  | 1.71 | 3.27  | 1.55E-06 | 1.23E-04 | NM_020009   | NM_020009   | NM_020009   | Mm.21158  | 56717  | ENSMUST00000103221 |
| A_55_P2152926 | <b>Mybbp1a</b>   | MYB binding protein (P160) 1a                                              | 0.78 | 1.73  | 4.10E-06 | 2.16E-04 | NM_016776   | NM_016776   | NM_016776   | Mm.147946 | 18432  | ENSMUST00000152894 |
| A_52_P108346  | <b>Myc</b>       | myelocytomatosis oncogene                                                  | 1.07 | 2.10  | 8.29E-07 | 9.30E-05 | NM_010849   | NM_010849   | NM_010849   | Mm.2444   | 17869  | ENSMUST00000167731 |
| A_51_P473919  | <b>Mycbp2</b>    | MYC binding protein 2                                                      | 2.15 | 4.43  | 7.23E-09 | 9.49E-06 | NM_207215   | NM_207215   | NM_207215   | Mm.6478   | 105689 | ENSMUST00000159855 |
| A_52_P536494  | <b>Mycn</b>      | v-myc myelocytomatosis viral related oncogene, neuroblaston 1              | 1.24 | 2.37  | 4.35E-05 | 8.81E-04 | NM_008709   | NM_008709   | NM_008709   | Mm.16469  | 18109  | ENSMUST00000043396 |
| A_55_P2088525 | <b>Myh10</b>     | myosin, heavy polypeptide 10, non-muscle                                   | 2.90 | 7.48  | 4.29E-08 | 2.20E-05 | NM_175260   | NM_175260   | NM_175260   | Mm.218233 | 77579  | ENSMUST00000102611 |
| A_55_P2090700 | <b>Myh14</b>     | myosin, heavy polypeptide 14, non-muscle                                   | 2.10 | 4.30  | 1.12E-08 | 1.19E-05 | NM_00127153 | NM_00127153 | NM_00127153 | Mm.158289 | 71960  | ENSMUST00000107900 |
| A_55_P2028600 | <b>Myh9</b>      | myosin, heavy polypeptide 9, non-muscle                                    | 4.00 | 15.98 | 8.80E-10 | 4.68E-06 | NM_022410   | NM_022410   | NM_022410   | Mm.29677  | 17886  | ENSMUST00000167711 |
| A_55_P1993744 | <b>Myo10</b>     | myosin X                                                                   | 1.92 | 3.78  | 4.14E-08 | 2.20E-05 | NM_019472   | NM_019472   | NM_019472   | Mm.60590  | 17909  | ENSMUST00000110457 |
| A_55_P2181306 | <b>Myo16</b>     | myosin XVI                                                                 | 0.97 | 1.96  | 2.61E-05 | 6.45E-04 | NM_00108139 | NM_00108139 | NM_00108139 | Mm.422761 | 244281 | ENSMUST00000042103 |
| A_55_P2154054 | <b>Myo18a</b>    | myosin XVIIIa                                                              | 3.08 | 8.45  | 3.11E-09 | 6.76E-06 | NM_011586   | NM_011586   | NM_011586   | Mm.341248 | 360103 | ENSMUST00000108375 |
| A_51_P434171  | <b>Myo19</b>     | myosin XIX                                                                 | 1.46 | 2.75  | 6.65E-06 | 2.90E-04 | NM_025414   | NM_025414   | NM_025414   | Mm.288689 | 66196  | ENSMUST00000141705 |
| A_55_P1955039 | <b>Myo1b</b>     | myosin IB                                                                  | 1.24 | 2.36  | 4.94E-07 | 7.25E-05 | NM_00116181 | NM_00116181 | NM_00116181 | Mm.3390   | 17912  | ENSMUST00000185611 |
| A_52_P650855  | <b>Myo1d</b>     | myosin ID                                                                  | 1.16 | 2.23  | 1.24E-06 | 1.10E-04 | NM_177390   | NM_177390   | NM_177390   | Mm.151948 | 338367 | ENSMUST00000041065 |
| A_51_P406583  | <b>Myo1e</b>     | myosin IE                                                                  | 2.79 | 6.91  | 8.28E-10 | 4.68E-06 | NM_181072   | NM_181072   | NM_181072   | Mm.249311 | 71602  | ENSMUST00000034745 |
| A_66_P112305  | <b>Myo1f</b>     | myosin IF                                                                  | 1.17 | 1.63  | 3.76E-05 | 9.39E-04 | NM_053214   | NM_053214   | NM_053214   | Mm.42019  | 17916  | ENSMUST00000173372 |
| A_55_P2006250 | <b>Myo5a</b>     | myosin VA                                                                  | 2.24 | 4.73  | 4.35E-08 | 1.92E-05 | NM_010864   | NM_010864   | NM_010864   | Mm.3645   | 17918  | ENSMUST00000123128 |
| A_55_P2096081 | <b>Myo5b</b>     | myosin VB                                                                  | 1.38 | 2.60  | 3.44E-07 | 6.10E-05 | NM_201600   | NM_201600   | NM_201600   | Mm.260098 | 17919  | ENSMUST00000121875 |
| A_55_P2024669 | <b>Myo6</b>      | myosin VI                                                                  | 3.60 | 12.11 | 1.01E-09 | 4.68E-06 | NM_00103954 | NM_00103954 | NM_00103954 | Mm.4040   | 17920  | ENSMUST00000127779 |
| A_52_P201531  | <b>Myo9a</b>     | myosin IXa                                                                 | 1.09 | 2.12  | 3.18E-06 | 1.86E-04 | NM_173018   | NM_173018   | NM_173018   | Mm.249545 | 270163 | ENSMUST00000136740 |
| A_51_P375558  | <b>Myc</b>       | myocilin                                                                   | 1.33 | 2.52  | 5.42E-06 | 2.55E-04 | NM_010865   | NM_010865   | NM_010865   | Mm.10694  | 17926  | ENSMUST00000208020 |
| A_52_P173703  | <b>Myp1p</b>     | myosin VIIa and Rab interacting protein                                    | 0.92 | 1.90  | 3.49E-05 | 7.65E-04 | NM_144557   | NM_144557   | NM_144557   | Mm.100936 | 245049 | ENSMUST00000048121 |
| A_55_P2056120 | <b>Myt1l</b>     | myelin transcription factor 1-like                                         | 1.40 | 2.64  | 4.42E-05 | 2.45E-04 | NM_00109377 | NM_00109377 | NM_00109377 | Mm.253067 | 17933  | ENSMUST00000049784 |
| A_55_P2452914 | <b>N4bp2</b>     | NEDD4 binding protein 2                                                    | 1.68 | 3.21  | 1.47E-08 | 1.34E-05 | NM_00102491 | NM_00102491 | NM_00102491 | Mm.333398 | 333789 | ENSMUST00000138239 |
| A_51_P414448  | <b>Naa15</b>     | N(alpha)-acetyltransferase 15, NatA auxiliary subunit                      | 0.76 | 1.69  | 2.50E-05 | 6.26E-04 | NM_053089   | NM_053089   | NM_053089   | Mm.275281 | 74838  | ENSMUST00000029303 |
| A_52_P443167  | <b>Naa35</b>     | N(alpha)-acetyltransferase 35, NatC auxiliary subunit                      | 0.88 | 1.84  | 1.43E-04 | 1.92E-03 | NM_030153   | NM_030153   | NM_030153   | Mm.253902 | 72689  | ENSMUST00000172118 |
| A_52_P118886  | <b>Naa50</b>     | N(alpha)-acetyltransferase 50, NatE catalytic subunit                      | 0.88 | 1.84  | 3.40E-05 | 7.51E-04 | NM_028108   | NM_028108   | NM_028108   | Mm.278726 | 72117  | ENSMUST00000063520 |
| A_55_P2005853 | <b>Nacc2</b>     | nuoacuncubans associated 2, BEN and BTB (POZ) domain containing 2          | 0.87 | 1.83  | 4.78E-05 | 9.41E-04 | NM_00103706 | NM_00103706 | NM_00103706 | Mm.131074 | 69971  | ENSMUST00000114159 |
| A_51_P387235  | <b>Nampt</b>     | nicotinamide phosphoribosyltransferase                                     | 0.70 | 1.62  | 1.85E-05 | 5.26E-04 | NM_021524   | NM_021524   | NM_021524   | Mm.489597 | 59027  | ENSMUST00000020886 |
| A_51_P396207  | <b>Nap1f2</b>    | nucleosome assembly protein 1-like 2                                       | 0.79 | 1.72  | 3.89E-05 | 8.16E-04 | NM_008671   | NM_008671   | NM_008671   | Mm.386944 | 17954  | ENSMUST00000121720 |
| A_51_P213928  | <b>Nap1f3</b>    | nucleosome assembly protein 1-like 3                                       | 0.90 | 1.86  | 4.46E-06 | 2.27E-04 | NM_138742   | NM_138742   | NM_138742   | Mm.490573 | 54561  | ENSMUST00000079490 |
| A_52_P201551  | <b>Nav1</b>      | neuron navigator 1                                                         | 1.81 | 3.49  | 1.05     |          |             |             |             |           |        |                    |

|               |                  |                                                                                         |      |      |          |          |                                   |           |           |                    |        |                    |
|---------------|------------------|-----------------------------------------------------------------------------------------|------|------|----------|----------|-----------------------------------|-----------|-----------|--------------------|--------|--------------------|
| A_52_P464629  | <b>Nme7</b>      | NME/NUM23 family member 7                                                               | 0.97 | 1.96 | 9.13E-04 | 3.50E-04 | NM_138314                         | NM_138314 | NM_138314 | Mm.219428          | 171567 | ENSMUST0000086028  |
| A_52_P489119  | <b>Nol6</b>      | nucleolar protein family 6 (RNA-associated)                                             | 0.58 | 1.50 | 1.16E-04 | 1.67E-03 | NM_139236                         | NM_139236 | NM_139236 | Mm.285797          | 230082 | ENSMUST0000003138  |
| A_51_P246705  | <b>Nop14</b>     | NOP14 nucleolar protein                                                                 | 0.67 | 1.59 | 1.09E-04 | 1.60E-03 | NM_029278                         | NM_029278 | NM_029278 | Mm.40292           | 75416  | ENSMUST00000041364 |
| A_55_P2034033 | <b>Nos3</b>      | nitric oxide synthase 3, endothelial cell                                               | 0.71 | 1.63 | 3.08E-05 | 7.09E-04 | NM_008713                         | NM_008713 | NM_008713 | Mm.258415          | 18122  | ENSMUST00000030384 |
| A_55_P2047168 | <b>Notch1</b>    | notch 1                                                                                 | 0.87 | 1.83 | 4.10E-05 | 8.45E-04 | NM_008714                         | NM_008714 | NM_008714 | Mm.290610          | 18128  | ENSMUST0000028288  |
| A_52_P289213  | <b>Notch2</b>    | notch 2                                                                                 | 1.00 | 2.00 | 3.32E-06 | 1.91E-04 | NM_010928                         | NM_010928 | NM_010928 | Mm.485843          | 18129  | ENSMUST0000079812  |
| A_51_P220162  | <b>Notch3</b>    | notch 3                                                                                 | 1.05 | 2.08 | 6.22E-06 | 2.80E-04 | NM_008716                         | NM_008716 | NM_008716 | Mm.439741          | 18131  | ENSMUST0000087723  |
| A_51_P349341  | <b>Npc1</b>      | Niemann Pick type C1                                                                    | 1.50 | 2.83 | 6.09E-07 | 8.14E-05 | NM_008720                         | NM_008720 | NM_008720 | Mm.3484            | 18148  | ENSMUST0000025279  |
| A_55_P2111745 | <b>Npcd</b>      | neuronal pentraxin chromo domain                                                        | 0.52 | 1.43 | 1.22E-04 | 1.73E-03 | NM_00101336NM_00101336NM_00101336 | Mm.38438  | 504193    | ENSMUST0000089299  |        |                    |
| A_52_P479500  | <b>Nppeps</b>    | aminopeptidase puromycin sensitive                                                      | 1.15 | 2.21 | 1.81E-06 | 1.34E-04 | NM_008942                         | NM_008942 | NM_008942 | Mm.29824           | 19155  | ENSMUST0000011320  |
| A_55_P1993549 | <b>Npr1</b>      | nephrocin                                                                               | 0.58 | 1.49 | 3.73E-05 | 7.95E-04 | NM_033525                         | NM_033525 | NM_033525 | Mm.279310          | 114249 | ENSMUST0000042729  |
| A_55_P2076832 | <b>Nrd1</b>      | nardilysin, N-arginine dibasic convertase, NRD convertase 1                             | 0.72 | 1.65 | 4.48E-06 | 2.27E-04 | NM_146150                         | NM_146150 | NM_146150 | Mm.274950          | 230598 | ENSMUST0000065977  |
| A_51_P213592  | <b>Nrde2</b>     | nrde-2 necessary for RNA interference, domain containing                                | 0.85 | 1.81 | 1.35E-04 | 1.84E-03 | NM_183155                         | NM_183155 | NM_183155 | Mm.224076          | 217827 | ENSMUST00000021596 |
| A_51_P469285  | <b>Nrp1</b>      | neuropilin 1                                                                            | 0.74 | 1.67 | 7.40E-05 | 1.24E-03 | NM_008737                         | NM_008737 | NM_008737 | Mm.271745          | 18186  | ENSMUST00000026917 |
| A_52_P93910   | <b>Nrp2</b>      | neuropilin 2                                                                            | 0.91 | 1.88 | 9.39E-06 | 3.55E-04 | NM_0107740NM_0107740NM_0107740    | Mm.266341 | 18187     | ENSMUST00000075144 |        |                    |
| A_55_P2054628 | <b>Nrxn1</b>     | neuroligin 1                                                                            | 0.85 | 1.80 | 7.14E-06 | 3.02E-04 | NM_020252                         | NM_020252 | NM_020252 | Mm.312068          | 18189  | ENSMUST00000176174 |
| A_55_P2054640 | <b>Nrxn3</b>     | neuroligin III                                                                          | 1.11 | 2.15 | 9.27E-07 | 9.75E-05 | NM_172544                         | NM_172544 | NM_172544 | Mm.425766          | 18191  | ENSMUST00000167887 |
| A_66_P137462  | <b>Nsdhl</b>     | NAD(P) dependent steroid dehydrogenase-like                                             | 0.66 | 1.58 | 8.79E-05 | 1.39E-03 | NM_010941                         | NM_010941 | NM_010941 | Mm.38792           | 18194  | ENSMUST0000033715  |
| A_51_P389386  | <b>Nsmce2</b>    | non-SMC element 2 homolog (MMS21, S. cerevisiae)                                        | 0.75 | 1.68 | 4.25E-05 | 8.68E-04 | NM_026746                         | NM_026746 | NM_026746 | Mm.27762           | 68501  | ENSMUST00000079703 |
| A_55_P2143688 | <b>Ntm</b>       | neurotrophin                                                                            | 0.87 | 1.82 | 5.37E-05 | 1.01E-03 | NM_172290                         | NM_172290 | NM_172290 | Mm.283138          | 235106 | ENSMUST00000115237 |
| A_51_P497661  | <b>Ntn4</b>      | netrin 4                                                                                | 0.72 | 1.64 | 2.96E-05 | 6.91E-04 | NM_021320                         | NM_021320 | NM_021320 | Mm.483868          | 57764  | ENSMUST00000020204 |
| A_51_P393454  | <b>Ntrk2</b>     | neurotrophic tyrosine kinase, receptor, type 2                                          | 1.02 | 2.03 | 2.26E-06 | 1.51E-04 | NM_00102507NM_00102507NM_00102507 | Mm.130054 | 18212     | ENSMUST0000079828  |        |                    |
| A_55_P2056533 | <b>Ntrk3</b>     | neurotrophic tyrosine kinase, receptor, type 3                                          | 1.00 | 2.00 | 2.56E-05 | 6.36E-04 | NM_008746                         | NM_008746 | NM_008746 | Mm.33496           | 18213  | ENSMUST00000039431 |
| A_55_P2068172 | <b>Nuf2</b>      | nuclear fragile X mental retardation protein interacting protein                        | 0.90 | 1.87 | 4.10E-05 | 8.45E-04 | NM_00102420NM_00102420NM_00102420 | Mm.428996 | 86564     | 0                  |        |                    |
| A_66_P128918  | <b>Numb1</b>     | numb-like                                                                               | 0.67 | 1.59 | 1.60E-03 | 2.10E-05 | NM_010950                         | NM_010950 | NM_010950 | Mm.459153          | 18223  | ENSMUST0000079258  |
| A_52_P286002  | <b>Obsl1</b>     | obscurin-like 1                                                                         | 0.60 | 1.52 | 3.51E-05 | 7.66E-04 | NM_178884                         | NM_178884 | NM_178884 | Mm.236454          | 98733  | ENSMUST00000127507 |
| A_51_P261107  | <b>Ogt</b>       | O-linked N-acetylglucosamine (GlcNAc) transferase (UDP-N-acetylglucosamine 2-epimerase) | 1.43 | 2.70 | 2.31E-07 | 4.92E-05 | NM_139144                         | NM_139144 | NM_139144 | Mm.259191          | 108155 | ENSMUST00000044475 |
| A_52_P454183  | <b>Olfm12b</b>   | olfactomedin-like 2B                                                                    | 0.84 | 1.79 | 3.85E-05 | 8.11E-04 | NM_177068                         | NM_177068 | NM_177068 | Mm.287131          | 320078 | ENSMUST00000046792 |
| A_52_P454295  | <b>Olfm12b</b>   | olfactomedin-like 2B                                                                    | 0.48 | 1.40 | 1.34E-04 | 1.84E-03 | NM_177068                         | NM_177068 | NM_177068 | Mm.287131          | 320078 | ENSMUST00000046792 |
| A_52_P632359  | <b>Olfir1316</b> | olfactory receptor 1316                                                                 | 1.03 | 2.04 | 2.53E-05 | 6.31E-04 | NM_146742                         | NM_146742 | NM_146742 | Mm.377665          | 258737 | ENSMUST0000099596  |
| A_51_P499223  | <b>Olfir1354</b> | olfactory receptor 1354                                                                 | 1.15 | 2.22 | 3.12E-06 | 1.84E-04 | NM_00119984NM_00119984NM_00119984 | Mm.41945  | 259163    | ENSMUST00000075859 |        |                    |
| A_51_P491856  | <b>Olfir1358</b> | olfactory receptor 1358                                                                 | 2.06 | 4.16 | 8.94E-08 | 3.18E-05 | XM_622784                         | XM_622784 | XM_622784 | Mm.380597          | 258224 | 0                  |
| A_52_P91019   | <b>Olfir1386</b> | olfactory receptor 1386                                                                 | 2.14 | 4.41 | 2.46E-08 | 1.69E-05 | NM_00101174NM_00101174NM_00101174 | Mm.377286 | 257888    | ENSMUST00000071905 |        |                    |
| A_51_P476798  | <b>Olfir2</b>    | olfactory receptor 2                                                                    | 0.80 | 1.74 | 3.21E-05 | 7.27E-04 | NM_010983                         | NM_010983 | NM_010983 | Mm.246525          | 18317  | ENSMUST00000094109 |
| A_52_P242724  | <b>Opa1</b>      | optic atrophy 1                                                                         | 0.80 | 1.74 | 7.68E-05 | 1.27E-03 | NM_00119917NM_00119917NM_00119917 | Mm.274285 | 74443     | ENSMUST00000160597 |        |                    |
| A_51_P378550  | <b>Oplah</b>     | 5-oxoprolinase (ATP-hydrolysing)                                                        | 0.80 | 1.74 | 1.47E-05 | 4.60E-04 | NM_153122                         | NM_153122 | NM_153122 | Mm.322738          | 75145  | ENSMUST00000023222 |
| A_55_P2066598 | <b>Opr1</b>      | opioid receptor-like 1                                                                  | 1.04 | 2.05 | 7.68E-05 | 1.27E-03 | NM_011012                         | NM_011012 | NM_011012 | Mm.289075          | 18389  | ENSMUST00000108767 |
| A_55_P2066593 | <b>Opr1</b>      | opioid receptor-like 1                                                                  | 0.74 | 1.67 | 9.84E-06 | 3.65E-04 | NM_011012                         | NM_011012 | NM_011012 | Mm.289075          | 18389  | ENSMUST00000135335 |
| A_51_P100309  | <b>Oprm1</b>     | opioid receptor, mu 1                                                                   | 0.96 | 1.95 | 3.76E-05 | 7.99E-04 | NM_00103966NM_00103966NM_00103966 | Mm.439715 | 18390     | ENSMUST00000092734 |        |                    |
| A_51_P109171  | <b>Osn9</b>      | amplified in osteosarcoma                                                               | 0.95 | 1.93 | 9.88E-05 | 1.51E-03 | NM_177614                         | NM_177614 | NM_177614 | Mm.295246          | 216440 | ENSMUST00000164259 |
| A_55_P2029503 | <b>Ospb1a</b>    | oxysterol binding protein-like 1A                                                       | 0.65 | 1.57 | 5.81E-05 | 1.06E-03 | NM_207530                         | NM_207530 | NM_207530 | Mm.259470          | 64291  | ENSMUST00000132594 |
| A_52_P593015  | <b>Ostc</b>      | oligosaccharyltransferase complex subunit                                               | 0.79 | 1.73 | 7.44E-05 | 1.24E-03 | NM_025509                         | NM_025509 | NM_025509 | Mm.300697          | 66251  | ENSMUST00000043937 |
| A_51_P506733  | <b>P2rx7</b>     | purinergic receptor P2X, ligand-gated ion channel, 7                                    | 0.80 | 1.74 | 1.02E-04 | 1.54E-03 | NM_00103884NM_00103884NM_00103884 | Mm.42026  | 18439     | ENSMUST00000031425 |        |                    |
| A_55_P2117146 | <b>Pa2g4</b>     | proliferation-associated 2G4                                                            | 0.86 | 1.82 | 1.43E-04 | 1.91E-03 | NM_011119                         | NM_011119 | NM_011119 | Mm.4742            | 18813  | ENSMUST00000026425 |
| A_66_P115406  | <b>Pabpc1</b>    | poly(A) binding protein, cytoplasmic 1                                                  | 1.24 | 2.37 | 7.85E-07 | 9.08E-05 | NM_008774                         | NM_008774 | NM_008774 | Mm.371570          | 18458  | ENSMUST00000146577 |
| A_65_P048881  | <b>Pabpc11</b>   | poly(A) binding protein, cytoplasmic 1-like                                             | 0.68 | 2.79 | 2.18E-06 | 1.49E-04 | NM_00111407NM_00111407NM_00111407 | Mm.82301  | 381404    | ENSMUST00000067715 |        |                    |
| A_55_P2020607 | <b>Pacsin1</b>   | protein kinase C and casein kinase substrate in neurons 1                               | 0.61 | 1.52 | 1.30E-04 | 1.80E-03 | NM_011861                         | NM_011861 | NM_011861 | Mm.4926            | 23969  | ENSMUST00000045896 |
| A_55_P1992769 | <b>Pafah1b1</b>  | platelet-activating factor acetylhydrolase, isoform 1b, subunit 1                       | 0.67 | 1.59 | 1.47E-04 | 1.95E-03 | NM_013625                         | NM_013625 | NM_013625 | Mm.397111          | 18472  | ENSMUST00000021091 |
| A_51_P172323  | <b>Pak2</b>      | p21 protein (Cdc42/Rac)-activated kinase 2                                              | 0.99 | 1.98 | 1.69E-06 | 1.30E-04 | NM_177326                         | NM_177326 | NM_177326 | Mm.234204          | 224105 | ENSMUST00000023467 |
| A_55_P1977653 | <b>Pall1</b>     | palladin, cytoskeleton-associated protein                                               | 0.80 | 1.75 | 4.79E-05 | 9.42E-04 | NM_00108139NM_00108139NM_00108139 | Mm.29303  | 72333     | ENSMUST00000034057 |        |                    |
| A_51_P196127  | <b>Paps1</b>     | 3'-phosphoadenosine 5'-phosphosulfate synthase 1                                        | 1.15 | 2.21 | 8.34E-06 | 3.31E-04 | NM_011863                         | NM_011863 | NM_011863 | Mm.244912          | 21971  | ENSMUST0000029666  |
| A_51_P430973  | <b>Parp7</b>     | progestin and adipoQ receptor family member VII                                         | 0.53 | 1.45 | 1.00E-04 | 1.52E-03 | NM_027995                         | NM_027995 | NM_027995 | Mm.412943          | 73904  | ENSMUST00000081525 |
| A_52_P51548   | <b>Pard3</b>     | par-3 (partitioning defective 3) homolog (C. elegans)                                   | 0.85 | 1.81 | 1.52E-04 | 1.99E-03 | NM_033620                         | NM_033620 | NM_033620 | Mm.299254          | 93742  | ENSMUST00000162309 |
| A_52_P247943  | <b>Parl</b>      | presenilin associated, rhomboid-like                                                    | 0.55 | 1.46 | 1.44E-04 | 1.93E-03 | NM_00100576NM_00100576NM_00100576 | Mm.371737 | 381038    | ENSMUST00000152887 |        |                    |
| A_51_P314277  | <b>Parp1</b>     | poly (ADP-ribose) polymerase family, member 1                                           | 0.81 | 1.75 | 1.95E-05 | 5.42E-04 | NM_007415                         | NM_007415 | NM_007415 | Mm.277779          | 11545  | ENSMUST00000027777 |
| A_51_P343913  | <b>Parp4</b>     | poly (ADP-ribose) polymerase family, member 4                                           | 1.02 | 2.11 | 1.31E-05 | 4.29E-04 | NM_00114597NM_00114597NM_00114597 | Mm.379357 | 328243    | ENSMUST00000161553 |        |                    |
| A_55_P2042272 | <b>Pbrm1</b>     | polycomb 1                                                                              | 0.88 | 1.76 | 8.70E-05 | 1.38E-03 | AK166688                          | AK166688  | AK166688  | Mm.27913           | 66923  | 0                  |
| A_55_P2051696 | <b>Pbx1</b>      | pre B cell leukemia homeobox 1                                                          | 0.91 | 1.88 | 3.41E-05 | 7.52E-04 | NM_008783                         | NM_008783 | NM_008783 | Mm.43358           | 18514  | ENSMUST00000072863 |
| A_51_P484254  | <b>Pcca</b>      | propionyl-Coenzyme A carboxylase, alpha polypeptide                                     | 0.90 | 1.87 | 6.48E-06 | 2.85E-04 | NM_144844                         | NM_144844 | NM_144844 | Mm.23876           | 110821 | ENSMUST00000038374 |
| A_66_P130887  | <b>Pcdh18</b>    | protocadherin 18                                                                        | 0.63 | 1.77 | 1.50E-04 | 1.98E-03 | NM_130448                         | NM_130448 | NM_130448 | Mm.87246           | 73173  | ENSMUST00000035931 |
| A_52_P432969  | <b>Pcdh19</b>    | protocadherin 19                                                                        | 0.67 | 1.59 | 6.80E-05 | 1.17E-03 | NM_0010524NM_0010524NM_0010524    | Mm.39738  | 279653    | ENSMUST00000149154 |        |                    |
| A_55_P2035167 | <b>Pcdh7</b>     | protocadherin 7                                                                         | 1.29 | 2.45 | 8.90E-06 | 3.44E-04 | NM_00112275NM_00112275NM_00112275 | Mm.332387 | 54210     | ENSMUST00000039568 |        |                    |
| A_51_P274488  | <b>Pcdh8</b>     | protocadherin 8                                                                         | 1.60 | 3.04 | 1.84E-07 | 4.50E-05 | NM_021543                         | NM_021543 | NM_021543 | Mm.390715          | 18536  | ENSMUST00000039568 |
| A_51_P476654  | <b>Pcdha11</b>   | protocadherin alpha 11                                                                  | 1.10 | 2.15 | 4.68E-06 | 2.33E-04 | NM_009960                         | NM_009960 | NM_009960 | Mm.308500          | 12942  | ENSMUST00000115657 |
| A_55_P2006632 | <b>Pcdha12</b>   | protocadherin alpha 12                                                                  | 0.91 | 1.88 | 1.57E-06 | 1.24E-04 | NM_138663                         | NM_138663 | NM_138663 | Mm.308500          | 192164 | ENSMUST00000047614 |
| A_51_P388048  | <b>Pcdha4</b>    | protocadherin alpha 4                                                                   | 0.87 | 1.83 | 1.05E-05 | 3.77E-04 | NM_007766                         | NM_007766 | NM_007766 | Mm.308500          | 12936  | ENSMUST00000115661 |
| A_55_P2106584 | <b>Pcdha8</b>    | protocadherin alpha 8                                                                   | 1.20 | 2.29 | 2.69E-06 | 1.67E-04 | NM_201243                         | NM_201243 | NM_201243 | Mm.308500          | 353235 | ENSMUST00000156    |

|               |                |                                                                  |      |       |          |          |                                               |        |                    |
|---------------|----------------|------------------------------------------------------------------|------|-------|----------|----------|-----------------------------------------------|--------|--------------------|
| A_52_P599624  | <b>Pfas</b>    | phosphoribosylformylglycinamide synthase (FGAR amidotra          | 1.03 | 2.05  | 3.78E-06 | 2.07E-04 | NM_001159511NM_001159511NM_001159511Mm.342088 | 237823 | ENSMUST00000172915 |
| A_55_P1963184 | <b>Pgap1</b>   | post-GPI attachment to proteins 1                                | 1.13 | 2.19  | 8.92E-06 | 3.45E-04 | NM_001163311NM_001163311NM_001163311Mm.103539 | 241062 | ENSMUST00000097739 |
| A_66_P111747  | <b>Pgk1</b>    | phosphoglycerate kinase 1                                        | 0.80 | 1.74  | 1.44E-04 | 1.93E-03 | ENSMUST00000                                  | 0      | 18655              |
| A_51_P213476  | <b>Pgr</b>     | progesterone receptor                                            | 0.79 | 1.73  | 4.07E-05 | 8.42E-04 | NM_008829 NM_008829 NM_008829 Mm.12798        | 18665  | ENSMUST00000070463 |
| A_55_P2127238 | <b>Phc3</b>    | polyhomeotic-like 3 (Drosophila)                                 | 1.15 | 2.22  | 4.73E-06 | 2.34E-04 | ENSMUST00000 AK166296 Mm.233173               | 241915 | ENSMUST00000091663 |
| A_55_P2081560 | <b>Phf20</b>   | PHD finger protein 20                                            | 0.72 | 1.65  | 8.20E-06 | 3.28E-04 | NM_172674 NM_172674 Mm.247078                 | 228829 | ENSMUST00000152617 |
| A_52_P587648  | <b>Phf3</b>    | PHD finger protein 3                                             | 0.74 | 1.67  | 6.65E-05 | 1.16E-03 | NM_001081081NM_001081081NM_001081081Mm.194486 | 213109 | ENSMUST00000088310 |
| A_51_P258698  | <b>Phf8</b>    | PHD finger protein 8                                             | 1.11 | 2.15  | 3.21E-06 | 1.87E-04 | NM_001113351NM_001113351NM_001113351Mm.17156  | 320595 | ENSMUST00000168501 |
| A_55_P2092310 | <b>Phgdh</b>   | 3-phosphoglycerate dehydrogenase                                 | 0.51 | 1.42  | 9.12E-05 | 1.42E-03 | AK195427 O AK195427 Mm.371997                 | 236539 | 0                  |
| A_55_P1972192 | <b>Phka1</b>   | phosphorylase kinase alpha 1                                     | 0.87 | 1.82  | 9.68E-07 | 9.88E-05 | NM_008832 NM_008832 NM_008832 Mm.212889       | 18679  | ENSMUST00000113611 |
| A_52_P187217  | <b>Phka2</b>   | phosphorylase kinase alpha 2                                     | 1.15 | 2.22  | 1.37E-05 | 4.41E-04 | NM_172783 NM_172783 NM_172783 Mm.350712       | 110094 | ENSMUST00000033652 |
| A_52_P513347  | <b>Phkb</b>    | phosphorylase kinase beta                                        | 0.83 | 1.78  | 3.41E-05 | 7.53E-04 | NM_199446 NM_199446 NM_199446 Mm.237296       | 102093 | ENSMUST00000163305 |
| A_55_P1981155 | <b>Phldb1</b>  | pleckstrin homology-like domain, family B, member 1              | 1.07 | 2.10  | 1.08E-06 | 1.03E-04 | NM_001081111NM_001081111NM_001081111Mm.248656 | 101471 | ENSMUST00000106027 |
| A_55_P2090055 | <b>Phrf1</b>   | PHD and ring finger domains 1                                    | 0.73 | 1.66  | 2.80E-05 | 6.71E-04 | NM_001001981NM_001001981NM_001001981Mm.5718   | 224020 | ENSMUST00000148110 |
| A_52_P454994  | <b>Phka</b>    | phosphatidylinositol 4-kinase, catalytic, alpha polypeptide      | 0.65 | 1.57  | 6.72E-05 | 1.16E-03 | NM_029988 NM_029988 NM_029988 Mm.283317       | 110417 | ENSMUST00000072154 |
| A_52_P607195  | <b>Pigh</b>    | phosphatidylinositol glycan anchor biosynthesis, class H         | 0.87 | 1.83  | 7.69E-06 | 3.14E-04 | NM_178016 NM_178016 NM_178016 Mm.331447       | 329777 | ENSMUST00000051510 |
| A_51_P197175  | <b>Pigk</b>    | phosphoinositide-3-kinase, class 3                               | 1.10 | 2.14  | 1.44E-06 | 1.19E-04 | NM_181414 NM_181414 NM_181414 Mm.194127       | 225326 | ENSMUST00000131405 |
| A_55_P2006911 | <b>Pik3c3</b>  | phosphoinositide-3-kinase, class 3                               | 1.22 | 2.33  | 1.19E-06 | 1.09E-04 | NM_001081301NM_001081301NM_001081301Mm.274830 | 75669  | ENSMUST00000065778 |
| A_51_P110035  | <b>Pik3r4</b>  | phosphoinositide-3 kinase, regulatory subunit, polypeptide       | 1.00 | 1.86  | 2.64E-05 | 6.49E-04 | NM_011086 NM_011086 NM_011086 Mm.83770        | 18711  | ENSMUST00000097707 |
| A_51_P393355  | <b>Pikfyve</b> | phosphoinositide kinase, FYVE finger containing                  | 0.90 | 1.71  | 1.17E-04 | 1.68E-03 | NM_001083111NM_001083111NM_001083111Mm.8211   | 18744  | ENSMUST00000113797 |
| A_55_P2037156 | <b>Pja1</b>    | praja 1, RING-H2 motif containing                                | 0.77 | 1.71  | 1.17E-04 | 1.68E-03 | NM_001083111NM_001083111NM_001083111Mm.8211   | 18744  | ENSMUST00000113797 |
| A_52_P420712  | <b>Pja2</b>    | praja 2, RING-H2 motif containing                                | 1.96 | 3.90  | 9.55E-07 | 9.82E-05 | NM_001025301NM_001025301NM_001025301Mm.489681 | 224938 | ENSMUST00000172733 |
| A_52_P234729  | <b>Pkd2</b>    | polycystic kidney disease 2                                      | 0.56 | 1.48  | 1.23E-04 | 1.74E-03 | NM_008861 NM_008861 NM_008861 Mm.6442         | 18764  | ENSMUST00000086831 |
| A_51_P228892  | <b>Pkd2l2</b>  | polycystic kidney disease 2-like 2                               | 0.75 | 1.68  | 1.15E-04 | 1.66E-03 | NM_016927 NM_016927 NM_016927 Mm.445792       | 53871  | ENSMUST00000014647 |
| A_52_P516091  | <b>Pla2g15</b> | phospholipase A2, group XV                                       | 0.78 | 1.72  | 9.93E-06 | 3.67E-04 | NM_133792 NM_133792 NM_133792 Mm.284770       | 192654 | ENSMUST00000034377 |
| A_66_P114784  | <b>Pla2g7</b>  | phospholipase A2, group VII (platelet-activating factor acetyltr | 1.36 | 2.56  | 1.03E-06 | 1.02E-04 | NM_013737 NM_013737 NM_013737 Mm.9277         | 27226  | ENSMUST00000167418 |
| A_55_P2173333 | <b>Picb4</b>   | phospholipase C, beta 4                                          | 0.58 | 1.49  | 8.96E-05 | 1.41E-03 | ENSMUST00000 BC051068 Mm.38009                | 18798  | ENSMUST00000110109 |
| A_52_P327588  | <b>Picd4</b>   | phospholipase C, delta 4                                         | 1.30 | 2.46  | 6.94E-07 | 8.60E-05 | NM_148937 NM_148937 NM_148937 Mm.290731       | 18802  | ENSMUST00000152707 |
| A_55_P2015860 | <b>Picg1</b>   | phospholipase C, gamma 1                                         | 1.15 | 2.23  | 9.75E-06 | 3.63E-04 | NM_021280 NM_021280 NM_021280 Mm.444683       | 18803  | ENSMUST00000170777 |
| A_51_P279163  | <b>Picg2</b>   | phospholipase C, gamma 2                                         | 0.95 | 1.93  | 1.69E-06 | 1.30E-04 | NM_172285 NM_172285 NM_172285 Mm.192699       | 234779 | ENSMUST00000081232 |
| A_55_P2139027 | <b>Plec</b>    | plectin                                                          | 1.22 | 2.33  | 7.41E-07 | 8.79E-05 | NM_001163541NM_001163541NM_001163541Mm.234912 | 18710  | ENSMUST00000073418 |
| A_55_P1968718 | <b>Plekha6</b> | pleckstrin homology domain containing, family A member 6         | 1.05 | 2.07  | 1.17E-05 | 3.99E-04 | NM_182930 NM_182930 NM_182930 Mm.253559       | 240753 | ENSMUST00000038295 |
| A_55_P2165500 | <b>Plekha9</b> | pleckstrin homology domain containing, family G (with RhoGe      | 0.62 | 1.54  | 1.23E-04 | 1.73E-03 | NM_001004151NM_001004151NM_001004151Mm.486442 | 269608 | ENSMUST00000105661 |
| A_55_P1968340 | <b>Plekhh1</b> | pleckstrin homology domain containing, family H (with MYTH4      | 0.74 | 1.67  | 2.45E-05 | 6.19E-04 | NM_181073 NM_181073 NM_181073 Mm.878321       | 211945 | ENSMUST00000039928 |
| A_55_P2169784 | <b>Plod1</b>   | procollagen-lysine, 2-oxoglutarate 5-dioxygenase 1               | 1.38 | 2.60  | 6.80E-07 | 8.57E-05 | NM_011122 NM_011122 NM_011122 Mm.37371        | 18822  | ENSMUST00000019199 |
| A_51_P396570  | <b>Plod2</b>   | procollagen lysine, 2-oxoglutarate 5-dioxygenase 2               | 0.56 | 1.48  | 6.49E-05 | 1.14E-03 | NM_011961 NM_011961 NM_011961 Mm.79833        | 26432  | ENSMUST00000070522 |
| A_55_P2160989 | <b>Pirg1</b>   | pleiotropic regulator 1, PRL1 homolog (Arabidopsis)              | 1.50 | 1.42  | 6.55E-05 | 1.15E-03 | NM_016784 NM_016784 NM_016784 Mm.286349       | 53317  | ENSMUST00000029628 |
| A_55_P2141851 | <b>Pls3</b>    | plastin 3 (T-isoform)                                            | 1.00 | 2.00  | 4.03E-06 | 2.14E-04 | NM_145629 NM_145629 NM_145629 Mm.28777        | 102866 | ENSMUST00000033547 |
| A_51_P232748  | <b>Plxnb3</b>  | plexin B3                                                        | 1.17 | 2.25  | 1.43E-06 | 1.19E-04 | NM_019587 NM_019587 NM_019587 Mm.275600       | 140571 | ENSMUST00000149478 |
| A_52_P642836  | <b>Pnma2</b>   | PNMA-like 2                                                      | 1.10 | 2.15  | 4.03E-06 | 2.14E-04 | NM_001099631NM_001099631NM_001099631Mm.483018 | 341218 | ENSMUST00000094807 |
| A_66_P125831  | <b>Pnn</b>     | pinin                                                            | 1.06 | 2.08  | 9.16E-07 | 9.70E-05 | NM_008891 NM_008891 NM_008891 Mm.22347        | 18949  | ENSMUST00000021381 |
| A_55_P2018841 | <b>Pnp</b>     | purine-nucleoside phosphorylase                                  | 0.73 | 1.65  | 6.19E-05 | 1.10E-03 | NM_013632 NM_013632 NM_013632 Mm.17932        | 18540  | ENSMUST00000038615 |
| A_55_P1985219 | <b>Pnp1a6</b>  | patatin-like phospholipase domain containing 6                   | 0.80 | 1.74  | 1.12E-05 | 3.91E-04 | NM_001122811NM_001122811NM_001122811Mm.23085  | 57652  | ENSMUST00000111070 |
| A_55_P2114347 | <b>Pnp1a8</b>  | patatin-like phospholipase domain containing 8                   | 0.59 | 1.51  | 1.05E-04 | 1.56E-03 | NM_026164 NM_026164 NM_026164 Mm.54126        | 64784  | 0                  |
| A_55_P1952235 | <b>Pnp1o</b>   | pyridoxine 5-phosphate oxidase                                   | 0.53 | 1.45  | 1.22E-04 | 1.73E-03 | NM_134021 NM_134021 NM_134021 Mm.254704       | 103711 | ENSMUST00000153896 |
| A_55_P1975110 | <b>Pnp1t</b>   | polynucleotide nucleotidyltransferase 1                          | 1.11 | 2.16  | 9.82E-07 | 9.96E-05 | NM_027869 NM_027869 NM_027869 Mm.211131       | 71071  | ENSMUST00000154924 |
| A_51_P513449  | <b>Pogz</b>    | pogo transposable element with ZNF domain                        | 0.99 | 1.99  | 1.22E-06 | 1.10E-04 | NM_172683 NM_172683 NM_172683 Mm.274787       | 229584 | ENSMUST00000102720 |
| A_51_P483261  | <b>Pomf1</b>   | protein-O-mannosyltransferase 1                                  | 0.97 | 1.96  | 3.43E-06 | 1.94E-04 | NM_145145 NM_145145 NM_145145 Mm.31192        | 91901  | ENSMUST00000129163 |
| A_52_P126055  | <b>Pon2</b>    | paraoxonase 2                                                    | 0.85 | 1.81  | 1.35E-05 | 4.35E-04 | NM_183308 NM_183308 NM_183308 Mm.126964       | 330260 | ENSMUST00000057792 |
| A_55_P1954086 | <b>Poptn</b>   | perostin, osteoblast specific factor                             | 0.97 | 1.96  | 1.24E-06 | 1.10E-04 | NM_001198761NM_001198761NM_001198761Mm.236507 | 50706  | ENSMUST00000107985 |
| A_66_P139785  | <b>Ppap2b</b>  | phosphatidic acid phosphatase type 2B                            | 0.82 | 1.77  | 2.91E-05 | 6.85E-04 | NM_080555 NM_080555 NM_080555 Mm.348326       | 67916  | ENSMUST00000064139 |
| A_52_P659258  | <b>Ppat</b>    | phosphoribosyl pyrophosphate amidotransferase                    | 1.04 | 2.06  | 1.34E-05 | 4.33E-04 | NM_172146 NM_172146 NM_172146 Mm.202337       | 231327 | ENSMUST00000031158 |
| A_51_P392377  | <b>Ppia2</b>   | protein tyrosine phosphatase, receptor type, f polypeptide (PT   | 0.99 | 1.99  | 9.64E-06 | 3.61E-04 | NM_177373 NM_177373 NM_177373 Mm.391424       | 327814 | ENSMUST00000028404 |
| A_55_P1998374 | <b>Ppifb1p</b> | PTPRF interacting protein, binding protein 1 (liprin beta 1)     | 1.46 | 3.12  | 2.27E-07 | 4.92E-05 | NM_001170431NM_001170431NM_001170431Mm.103382 | 67533  | ENSMUST00000116631 |
| A_55_P2016249 | <b>Ppid</b>    | peptidylprolyl isomerase D (cyclophilin D)                       | 1.64 | 2.75  | 4.33E-05 | 6.79E-04 | NM_026352 NM_026352 NM_026352 Mm.295252       | 67738  | ENSMUST00000161460 |
| A_52_P607683  | <b>Ppm1e</b>   | protein phosphatase 1E (PP2C domain containing)                  | 0.97 | 1.96  | 1.73E-05 | 5.04E-04 | NM_177167 NM_177167 NM_177167 Mm.341988       | 320478 | ENSMUST00000065438 |
| A_51_P484832  | <b>Ppm1g</b>   | protein phosphatase 1G (formerly 2C), magnesium-dependen         | 1.44 | 2.71  | 1.20E-06 | 1.09E-04 | NM_008014 NM_008014 NM_008014 Mm.14501        | 142082 | ENSMUST00000031032 |
| A_51_P265219  | <b>Ppm1k</b>   | protein phosphatase 1K (PP2C domain containing)                  | 0.95 | 1.93  | 8.22E-05 | 6.72E-04 | NM_175523 NM_175523 NM_175523 Mm.489618       | 243382 | ENSMUST00000042766 |
| A_52_P540434  | <b>Ppmtcc</b>  | protein phosphatase 1, catalytic subunit, gamma isoform          | 0.91 | 1.88  | 3.29E-06 | 1.90E-04 | NM_013636 NM_013636 NM_013636 Mm.280874       | 19047  | ENSMUST00000134719 |
| A_52_P116372  | <b>Ppmt15b</b> | protein phosphatase 1, regulatory (inhibitor) subunit 15b        | 0.76 | 1.69  | 1.95E-05 | 5.43E-04 | NM_133819 NM_133819 NM_133819 Mm.293628       | 108954 | ENSMUST00000052529 |
| A_52_P239536  | <b>Ppmt19a</b> | protein phosphatase 1, regulatory (inhibitor) subunit 9A         | 4.15 | 17.75 | 6.05E-10 | 4.08E-06 | NM_181595 NM_181595 NM_181595 Mm.332901       | 243725 | ENSMUST00000035813 |
| A_55_P1967315 | <b>Ppmt19b</b> | protein phosphatase 1, regulatory subunit 9B                     | 2.53 | 5.78  | 5.72E-09 | 8.90E-06 | NM_172261 NM_172261 NM_172261 Mm.490322       | 217124 | ENSMUST00000038696 |
| A_55_P2053783 | <b>Ppmt23a</b> | protein phosphatase 2, regulatory subunit B', alpha              | 1.09 | 2.13  | 5.92E-05 | 1.08E-03 | NM_001161361NM_001161361NM_001161361Mm.335386 | 235542 | ENSMUST00000075941 |
| A_52_P487362  | <b>Ppmt4r</b>  | protein phosphatase 4, regulatory subunit 4                      | 1.02 | 2.03  | 2.48E-05 | 6.23E-04 | NM_028980 NM_028980 NM_028980 Mm.248619       | 74521  | ENSMUST00000021631 |
| A_55_P2141415 | <b>Ppmt6r3</b> | protein phosphatase 6, regulatory subunit 3                      | 1.12 | 2.18  | 6.32E-06 | 2.82E-04 | AK018652 O AK018652 Mm.284866                 | 52036  | 0                  |
| A_55_P1991693 | <b>Ppmt7c</b>  | peroxisome proliferative activated receptor, gamma, coactivat    | 0.91 | 1.88  | 6.41E-06 | 2.84E-04 | NM_001081211NM_001081211NM_001081211Mm.2415   | 226169 | 0                  |
| A_55_P2082361 | <b>Ppt1</b>    | palmitoyl-protein thioesterase 1                                 | 1.00 | 2.00  | 3.98E-06 | 2.13E-04 | NM_008917 NM_008917 NM_008917 Mm.277119       | 19063  | ENSMUST00000030412 |
| A_51_P123604  | <b>Ppwd1</b>   | peptidylprolyl isomerase domain and WD repeat containing 1       | 0.75 | 1.68  | 3.86E-05 | 8.13E-04 | NM_172807 NM_172807 NM_172807 Mm.98910        | 238831 | ENSMUST0000022226  |
| A_55_P1988083 | <b>Prc1</b>    | protein regulator of cytokinesis 1                               | 0.98 | 1.98  | 1.05E-04 | 1.56E-03 | NM_145150 NM_145150 NM_145150 Mm.227274       | 233406 | ENSMUST00000163812 |
| A_55_P1979929 | <b>Prcp</b>    | prolylcarboxypeptidase (angiotensinase C)                        | 0.68 | 1.61  | 5.94E-05 | 1.08E-03 | NM_028243 NM_028243 NM_028243 Mm.389969       | 72461  | ENSMUST00000076052 |
| A_55_P1979457 | <b>Prdx4</b>   | prolylarginine oxidase                                           | 0.59 | 1.50  | 1.39E-04 | 1.88E-03 | NM_016764 NM_016764 NM_016764 Mm.247542       | 53381  | ENSMUST00000026328 |
| A_52_P90124   | <b>Prp</b>     | prolyl 4-hydroxylase                                             | 0.69 | 1.62  | 6.68E-05 | 1.1      |                                               |        |                    |



|               |                  |                                                               |      |      |          |          |                        |                        |             |           |                     |                     |
|---------------|------------------|---------------------------------------------------------------|------|------|----------|----------|------------------------|------------------------|-------------|-----------|---------------------|---------------------|
| A_52_P652212  | <b>Psmid14</b>   | proteasome (prosome, macropain) 26S subunit, non-ATPase,      | 0.97 | 1.96 | 1.77E-04 | 5.10E-04 | NM_021526              | NM_021526              | NM_021526   | NM_218198 | 59029               | ENSMUST00000146051  |
| A_55_P1976007 | <b>Psm4</b>      | proteasome (prosome, macropain) activator subunit 4           | 0.57 | 1.48 | 4.55E-05 | 9.09E-04 | NM_134013              | NM_134013              | NM_134013   | Mm.481953 | 103554              | ENSMUST00000129824  |
| A_66_P139876  | <b>PspH</b>      | phosphoserine phosphatase                                     | 0.66 | 1.58 | 1.22E-04 | 1.73E-03 | NM_133900              | NM_133900              | NM_133900   | Mm.217184 | 100678              | ENSMUST00000031399  |
| A_55_P2021545 | <b>Ptpcd1</b>    | pentatricopeptide repeat domain 1                             | 0.87 | 1.82 | 7.39E-05 | 1.24E-03 | AK172986               | 0                      | AK172986    | Mm.332840 | 71799               | 0                   |
| A_55_P2040227 | <b>Ptchcd4</b>   | patched domain containing 4                                   | 0.79 | 1.73 | 1.22E-04 | 1.72E-03 | NM_028474              | NM_028474              | NM_028474   | Mm.390999 | 627265              | ENSMUST00000048691  |
| A_51_P442053  | <b>Ptdss1</b>    | phosphatidylserine synthase 1                                 | 1.30 | 2.47 | 1.15E-05 | 3.96E-04 | NM_008959              | NM_008959              | NM_008959   | Mm.281464 | 19210               | ENSMUST00000021990  |
| A_51_P185713  | <b>Ptdss2</b>    | phosphatidylserine synthase 2                                 | 0.69 | 1.61 | 2.50E-05 | 6.27E-04 | NM_013782              | NM_013782              | NM_013782   | Mm.293591 | 27388               | ENSMUST00000026568  |
| A_51_P349008  | <b>Ptges2</b>    | prostaglandin E synthase 2                                    | 0.88 | 1.84 | 4.19E-05 | 8.59E-04 | NM_133783              | NM_133783              | NM_133783   | Mm.280498 | 96779               | ENSMUST00000028162  |
| A_55_P2349265 | <b>Ptk2</b>      | PTK2 protein tyrosine kinase 2                                | 0.68 | 1.60 | 1.11E-04 | 1.62E-03 | NM_00113040NM_00113040 | NM_00113040NM_00113040 | NM_00113040 | Mm.254494 | 14083               | ENSMUST00000170399  |
| A_51_P311904  | <b>Ptk2b</b>     | PTK2 protein tyrosine kinase 2 beta                           | 0.87 | 1.82 | 1.02E-05 | 3.72E-04 | NM_172498              | NM_172498              | NM_172498   | Mm.21613  | 19229               | ENSMUST00000136216  |
| A_52_P585652  | <b>Ptp4a2</b>    | protein tyrosine phosphatase 4a2                              | 0.69 | 1.61 | 1.98E-05 | 5.44E-04 | NM_008974              | NM_008974              | NM_008974   | Mm.193688 | 19244               | ENSMUST00000030578  |
| A_55_P2069485 | <b>Ptpn13</b>    | protein tyrosine phosphatase, non-receptor type 13            | 1.11 | 2.15 | 3.43E-06 | 1.94E-04 | NM_011204              | NM_011204              | NM_011204   | Mm.31414  | 19249               | ENSMUST00000048957  |
| A_55_P2172989 | <b>Ptpn23</b>    | protein tyrosine phosphatase, non-receptor type 23            | 1.05 | 2.07 | 1.29E-06 | 1.13E-04 | NM_00108104NM_00108104 | NM_00108104NM_00108104 | Mm.335477   | 104831    | ENSMUST00000040021  |                     |
| A_55_P1987694 | <b>Ptpr</b>      | protein tyrosine phosphatase, receptor type, D                | 1.18 | 2.26 | 1.05E-06 | 1.02E-04 | NM_011211              | NM_011211              | NM_011211   | Mm.184021 | 19266               | ENSMUST00000008467  |
| A_55_P1992079 | <b>Ptprf</b>     | protein tyrosine phosphatase, receptor type, F                | 0.98 | 1.98 | 5.15E-06 | 2.47E-04 | NM_011213              | NM_011213              | NM_011213   | Mm.29855  | 19268               | ENSMUST000000124758 |
| A_55_P2006327 | <b>Ptprg</b>     | protein tyrosine phosphatase, receptor type, G                | 0.75 | 1.68 | 2.75E-05 | 6.63E-04 | NM_008981              | NM_008981              | NM_008981   | Mm.431266 | 19270               | ENSMUST00000142917  |
| A_52_P284165  | <b>Ptprk</b>     | protein tyrosine phosphatase, receptor type, K                | 0.74 | 1.67 | 8.77E-05 | 1.39E-03 | NM_008983              | NM_008983              | NM_008983   | Mm.332303 | 19272               | ENSMUST00000166468  |
| A_55_P2028591 | <b>Ptprm</b>     | protein tyrosine phosphatase, receptor type, M                | 1.01 | 2.02 | 7.86E-05 | 1.29E-03 | NM_008984              | NM_008984              | NM_008984   | Mm.311809 | 19274               | ENSMUST000000307974 |
| A_52_P15490   | <b>Pvr13</b>     | poliovirus receptor-related 3                                 | 0.82 | 1.76 | 3.70E-05 | 7.91E-04 | NM_021496              | NM_021496              | NM_021496   | Mm.328072 | 58998               | ENSMUST00000096052  |
| A_55_P2104327 | <b>Pxdn</b>      | peroxidasin homolog (Drosophila)                              | 0.72 | 1.65 | 1.18E-04 | 1.69E-03 | NM_181395              | NM_181395              | NM_181395   | Mm.251774 | 69675               | ENSMUST00000122328  |
| A_55_P2011545 | <b>Pyroxd1</b>   | pyridine nucleotide-disulphide oxidoreductase domain 1        | 1.11 | 2.15 | 6.88E-06 | 3.39E-04 | NM_183165              | NM_183165              | NM_183165   | Mm.490474 | 232491              | ENSMUST00000041852  |
| A_51_P287232  | <b>Qars</b>      | glutamyl-tRNA synthetase                                      | 1.75 | 1.68 | 1.03E-04 | 1.54E-03 | NM_133794              | NM_133794              | NM_133794   | Mm.272427 | 97541               | ENSMUST00000136623  |
| A_52_P543792  | <b>Orich1</b>    | glutamine-rich 1                                              | 1.02 | 2.03 | 3.12E-05 | 7.13E-04 | NM_175143              | NM_175143              | NM_175143   | Mm.485781 | 69232               | ENSMUST00000006851  |
| A_52_P138895  | <b>Qsox2</b>     | quiescen Q6 sulfhydryl oxidase 2                              | 0.60 | 1.52 | 2.03E-05 | 5.57E-04 | NM_153559              | NM_153559              | NM_153559   | Mm.116769 | 227638              | ENSMUST00000036187  |
| A_52_P444162  | <b>Rab11a</b>    | RAB11a, member RAS oncogene family                            | 0.68 | 1.61 | 9.18E-05 | 1.43E-03 | NM_017382              | NM_017382              | NM_017382   | Mm.1387   | 53869               | ENSMUST00000172298  |
| A_55_P2082156 | <b>Rab11fip3</b> | RAB11 family interacting protein 3 (class II)                 | 1.30 | 2.46 | 6.06E-06 | 2.75E-04 | NM_00116286NM_00116286 | NM_00116286NM_00116286 | Mm.41191    | 215445    | ENSMUST00000120691  |                     |
| A_52_P529360  | <b>Rab11fip5</b> | RAB11 family interacting protein 5 (class I)                  | 0.96 | 1.94 | 9.74E-05 | 1.49E-03 | NM_00100395NM_00100395 | NM_00100395NM_00100395 | Mm.220334   | 52055     | ENSMUST00000006837  |                     |
| A_51_P419117  | <b>Rab15</b>     | RAB15, member RAS oncogene family                             | 0.51 | 1.43 | 9.04E-05 | 1.42E-03 | NM_134050              | NM_134050              | NM_134050   | Mm.172747 | 104886              | ENSMUST00000021459  |
| A_51_P209280  | <b>Rab31</b>     | RAB31, member RAS oncogene family                             | 0.71 | 1.63 | 1.78E-05 | 5.13E-04 | NM_133685              | NM_133685              | NM_133685   | Mm.29474  | 106572              | ENSMUST00000070673  |
| A_52_P558939  | <b>Rab3gap1</b>  | RAB3 GTPase activating protein subunit 1                      | 0.87 | 1.82 | 2.82E-05 | 6.72E-04 | NM_178690              | NM_178690              | NM_178690   | Mm.489713 | 226407              | ENSMUST00000036749  |
| A_51_P244558  | <b>Rab3gap2</b>  | RAB3 GTPase activating protein subunit 2                      | 0.89 | 1.86 | 8.39E-06 | 3.32E-04 | NM_00116375NM_00116375 | NM_00116375NM_00116375 | Mm.278431   | 98782     | ENSMUST00000009652  |                     |
| A_51_P117604  | <b>Rab5a</b>     | RAB5A, member RAS oncogene family                             | 1.09 | 2.12 | 2.08E-06 | 1.44E-04 | NM_025887              | NM_025887              | NM_025887   | Mm.329123 | 271457              | ENSMUST00000017975  |
| A_55_P2060097 | <b>Rabep1</b>    | rabaptin, RAB GTPase binding effector protein 1               | 0.61 | 1.53 | 1.09E-04 | 1.60E-03 | ENSMUST0000            | BC003921               | Mm.7087     | 54189     | ENSMUST00000100928  |                     |
| A_55_P2167818 | <b>Rabgef1</b>   | RAB guanine nucleotide exchange factor (GEF) 1                | 0.94 | 1.92 | 3.54E-06 | 1.99E-04 | NM_019983              | NM_019983              | NM_019983   | Mm.288639 | 56715               | ENSMUST000000125937 |
| A_51_P394091  | <b>Rad21</b>     | RAD21 homolog (S. pombe)                                      | 1.81 | 1.75 | 1.14E-05 | 3.93E-04 | NM_009009              | NM_009009              | NM_009009   | Mm.182628 | 19357               | ENSMUST000000202927 |
| A_55_P2042958 | <b>Rad50</b>     | RAD50 homolog (S. cerevisiae)                                 | 1.36 | 2.56 | 1.68E-07 | 4.37E-05 | NM_009012              | NM_009012              | NM_009012   | Mm.4888   | 19360               | ENSMUST00000020649  |
| A_55_P2142371 | <b>Rai1</b>      | retinoic acid induced 1                                       | 1.34 | 2.52 | 1.39E-07 | 4.05E-05 | NM_009021              | NM_009021              | NM_009021   | Mm.296366 | 19377               | ENSMUST00000006190  |
| A_52_P51029   | <b>Ralgap1</b>   | Ral GTPase activating protein, alpha subunit 1                | 1.05 | 2.07 | 1.09E-04 | 1.60E-03 | NM_019994              | NM_019994              | NM_019994   | Mm.292180 | 56784               | ENSMUST00000110687  |
| A_51_P511375  | <b>Ranbp2</b>    | RAN binding protein 2                                         | 1.12 | 4.36 | 4.15E-08 | 2.20E-05 | NM_011240              | NM_011240              | NM_011240   | Mm.431695 | 19386               | ENSMUST00000003310  |
| A_52_P450123  | <b>Ranbp6</b>    | RAN binding protein 6                                         | 2.27 | 2.41 | 1.90E-06 | 1.38E-04 | NM_177721              | NM_177721              | NM_177721   | Mm.125503 | 240614              | ENSMUST00000099525  |
| A_55_P2064004 | <b>Rapgef2</b>   | Rap guanine nucleotide exchange factor (GEF) 2                | 0.89 | 1.85 | 1.10E-05 | 3.86E-04 | NM_00109962NM_00109962 | NM_00109962NM_00109962 | Mm.31220    | 76089     | ENSMUST00000118340  |                     |
| A_51_P285916  | <b>Rapgef4</b>   | Rap guanine nucleotide exchange factor (GEF) 4                | 0.95 | 1.93 | 3.37E-05 | 7.47E-04 | NM_019688              | NM_019688              | NM_019688   | Mm.196153 | 56508               | ENSMUST00000102698  |
| A_55_P2113683 | <b>Raph1</b>     | Ras association (Raf/GS/AF-6) and pleckstrin homology dorr    | 0.97 | 1.96 | 2.40E-06 | 1.57E-04 | NM_00104551NM_00104551 | NM_00104551NM_00104551 | Mm.440325   | 77300     | 0                   |                     |
| A_52_P288614  | <b>Rars</b>      | arginyl-tRNA synthetase                                       | 1.02 | 2.03 | 2.35E-05 | 6.03E-04 | NM_025936              | NM_025936              | NM_025936   | Mm.284906 | 104458              | ENSMUST00000165817  |
| A_55_P1968789 | <b>Rasa3</b>     | RAS p21 protein activator 3                                   | 0.66 | 1.59 | 6.90E-05 | 1.18E-03 | NM_009025              | NM_009025              | NM_009025   | Mm.18517  | 19414               | ENSMUST00000117551  |
| A_52_P16873   | <b>Rasa3l</b>    | RAS protein activator like 3                                  | 0.96 | 1.95 | 2.88E-05 | 6.80E-04 | NM_178785              | NM_178785              | NM_178785   | Mm.122284 | 320484              | ENSMUST00000074588  |
| A_52_P671676  | <b>Rasgrf1</b>   | RAS protein-specific guanine nucleotide-releasing factor 1    | 1.04 | 2.06 | 2.25E-06 | 1.51E-04 | NM_011245              | NM_011245              | NM_011245   | Mm.44561  | 19417               | ENSMUST000000304912 |
| A_55_P2096768 | <b>Rasgrf2</b>   | RAS protein-specific guanine nucleotide-releasing factor 2    | 1.19 | 2.28 | 6.09E-06 | 2.76E-04 | NM_009027              | NM_009027              | NM_009027   | Mm.248630 | 19418               | ENSMUST00000093326  |
| A_55_P1969560 | <b>Rasgrp1</b>   | RAS guanyl releasing protein 1                                | 0.63 | 1.55 | 1.01E-04 | 1.52E-03 | NM_011246              | NM_011246              | NM_011246   | Mm.42150  | 19419               | ENSMUST00000178884  |
| A_55_P2143233 | <b>Rasgrp2</b>   | RAS guanyl releasing protein 2                                | 1.03 | 2.04 | 5.43E-05 | 1.02E-03 | NM_011242              | NM_011242              | NM_011242   | Mm.77017  | 19395               | ENSMUST00000113468  |
| A_55_P2119030 | <b>Rasi2-9</b>   | RAS-like, family 2, locus 9                                   | 0.63 | 1.55 | 7.46E-05 | 1.24E-03 | NM_009028              | NM_009028              | NM_009028   | Mm.321186 | 19428               | ENSMUST00000147855  |
| A_52_P542172  | <b>Rb1cc1</b>    | RB1-inducible coiled-coil 1                                   | 0.90 | 1.86 | 6.92E-05 | 1.18E-03 | NM_009826              | NM_009826              | NM_009826   | Mm.293811 | 19421               | ENSMUST00000159656  |
| A_51_P516850  | <b>Rbbp5</b>     | retinoblastoma binding protein 5                              | 0.66 | 1.59 | 1.38E-04 | 1.85E-03 | NM_172517              | NM_172517              | NM_172517   | Mm.132868 | 213644              | ENSMUST00000027700  |
| A_55_P2080542 | <b>Rbbp7</b>     | retinoblastoma binding protein 7                              | 1.05 | 2.07 | 2.31E-06 | 1.54E-04 | NM_009031              | NM_009031              | NM_009031   | Mm.270186 | 245688              | ENSMUST00000033720  |
| A_55_P2016739 | <b>Rbm12b2</b>   | RNA binding motif protein 12 B2                               | 0.74 | 1.67 | 6.00E-05 | 1.08E-03 | NM_198957              | NM_198957              | NM_198957   | Mm.474129 | 77604               | ENSMUST00000063639  |
| A_55_P1996742 | <b>Rbm14</b>     | RNA binding motif protein 14                                  | 0.95 | 1.93 | 3.45E-05 | 7.58E-04 | NM_019869              | NM_019869              | NM_019869   | Mm.276338 | 56275               | ENSMUST00000006625  |
| A_55_P1968143 | <b>Rbm25</b>     | RNA binding motif protein 25                                  | 0.73 | 1.65 | 1.90E-05 | 5.34E-04 | NM_027349              | NM_027349              | NM_027349   | Mm.46005  | 67039               | ENSMUST00000048155  |
| A_52_P574993  | <b>Rbpj1</b>     | recombination signal binding protein for immunoglobulin kappa | 0.61 | 1.53 | 1.10E-04 | 1.61E-03 | NM_009036              | NM_009036              | NM_009036   | Mm.473794 | 19668               | ENSMUST00000137427  |
| A_66_P117389  | <b>Rcn2</b>      | reticulocalbin 2                                              | 1.49 | 2.81 | 5.06E-05 | 9.72E-04 | NM_011992              | NM_011992              | NM_011992   | Mm.1782   | 26611               | ENSMUST00000114726  |
| A_55_P2183172 | <b>Rdx</b>       | radixin                                                       | 0.83 | 1.77 | 2.65E-06 | 1.66E-04 | NM_00110461NM_00110461 | NM_00110461NM_00110461 | Mm.245746   | 19684     | ENSMUST000000061362 |                     |
| A_51_P297963  | <b>Recq1</b>     | RecQ protein-like                                             | 0.75 | 1.68 | 1.38E-05 | 4.42E-04 | NM_023042              | NM_023042              | NM_023042   | Mm.27407  | 19691               | ENSMUST00000111803  |
| A_55_P2035742 | <b>Reg3d</b>     | regenerating islet-derived 3 delta                            | 1.18 | 2.27 | 3.05E-05 | 7.07E-04 | NM_013893              | NM_013893              | NM_013893   | Mm.33691  | 30053               | ENSMUST00000089667  |
| A_66_P108810  | <b>Reln</b>      | reelin                                                        | 1.36 | 2.56 | 9.38E-07 | 9.77E-05 | NM_011261              | NM_011261              | NM_011261   | Mm.425236 | 19659               | ENSMUST00000159768  |
| A_55_P2013357 | <b>Renbp</b>     | renin binding protein                                         | 0.62 | 1.54 | 1.19E-04 | 1.70E-03 | NM_023132              | NM_023132              | NM_023132   | Mm.236969 | 67033               | ENSMUST00000135711  |
| A_55_P1968698 | <b>Rere</b>      | arginine glutamic acid dipeptide (RE) repeats                 | 0.86 | 1.81 | 5.33E-05 | 1.01E-03 | NM_00108545NM_00108545 | NM_00108545NM_00108545 | Mm.291274   | 19703     | ENSMUST00000105682  |                     |
| A_51_P217665  | <b>Rev3l</b>     | REV3-like, catalytic subunit of DNA polymerase zeta RAD54 I   | 0.96 | 1.95 | 5.11E-06 | 2.46E-   |                        |                        |             |           |                     |                     |

|               |                 |                                                                           |      |      |          |          |                                     |                                     |                                     |           |        |                    |
|---------------|-----------------|---------------------------------------------------------------------------|------|------|----------|----------|-------------------------------------|-------------------------------------|-------------------------------------|-----------|--------|--------------------|
| A_55_P1960626 | <b>Satb2</b>    | special AT-rich sequence binding protein 2                                | 1.35 | 2.55 | 1.58E-04 | 1.25E-04 | NM_139146                           | NM_139146                           | NM_139146                           | Mm.145599 | 212712 | ENSMUST0000042857  |
| A_51_P123805  | <b>Sbn1</b>     | sno, strawberry notch homolog 1 (Drosophila)                              | 0.91 | 1.88 | 3.13E-05 | 7.15E-04 | NM_0010812CNM_0010812CNM_0010812CNM | NM_0010812CNM_0010812CNM_0010812CNM | NM_0010812CNM_0010812CNM_0010812CNM | Mm.23879  | 243272 | ENSMUST0000065263  |
| A_55_P2055477 | <b>Scaf11</b>   | SR-related CTD-associated factor 11                                       | 1.57 | 2.98 | 2.44E-06 | 1.58E-04 | NM_028148                           | NM_028148                           | NM_028148                           | Mm.324474 | 72193  | ENSMUST0000047835  |
| A_51_P298666  | <b>Scaf4</b>    | SR-related CTD-associated factor 4                                        | 0.72 | 1.65 | 1.21E-04 | 1.72E-03 | NM_178923                           | NM_178923                           | NM_178923                           | Mm.439811 | 224432 | ENSMUST0000039280  |
| A_51_P494006  | <b>Scaf8</b>    | SR-related CTD-associated factor 8                                        | 0.51 | 1.43 | 1.18E-04 | 1.68E-03 | NM_134123                           | NM_134123                           | NM_134123                           | Mm.124373 | 106583 | ENSMUST0000076734  |
| A_55_P2426272 | <b>Scaper</b>   | S phase cyclin A-associated protein in the ER                             | 1.73 | 3.31 | 5.10E-07 | 7.35E-05 | NM_00108134NM_00108134NM_00108134NM | NM_00108134NM_00108134NM_00108134NM | NM_00108134NM_00108134NM_00108134NM | Mm.86588  | 544901 | ENSMUST0000037408  |
| A_52_P682382  | <b>Scd1</b>     | stearyl-Coenzyme A desaturase 1                                           | 1.15 | 2.22 | 3.33E-05 | 7.41E-04 | NM_009127                           | NM_009127                           | NM_009127                           | Mm.267377 | 20249  | ENSMUST0000041331  |
| A_51_P129464  | <b>Scd2</b>     | stearyl-Coenzyme A desaturase 2                                           | 1.26 | 2.39 | 5.92E-06 | 2.71E-04 | NM_009128                           | NM_009128                           | NM_009128                           | Mm.487021 | 20250  | ENSMUST0000026221  |
| A_55_P2083949 | <b>Scd1f</b>    | Scd1 family domain containing 1                                           | 1.55 | 2.93 | 3.52E-07 | 6.19E-05 | AK129238                            | 0                                   | AK129238                            | Mm.216511 | 76983  | 0                  |
| A_55_P2067905 | <b>Scd2f</b>    | Scd1 family domain containing 2                                           | 0.65 | 1.57 | 3.64E-05 | 7.83E-04 | NM_0011466NM_0011466NM_0011466NM    | NM_0011466NM_0011466NM_0011466NM    | NM_0011466NM_0011466NM_0011466NM    | Mm.134147 | 212986 | ENSMUST0000013542  |
| A_55_P2106514 | <b>Scn2a1</b>   | sodium channel, voltage-gated, type II, alpha 1                           | 1.05 | 2.07 | 7.67E-06 | 3.14E-04 | NM_00109929NM_00109929NM_00109929NM | NM_00109929NM_00109929NM_00109929NM | NM_00109929NM_00109929NM_00109929NM | Mm.220329 | 110876 | ENSMUST00000144254 |
| A_66_P106808  | <b>Scn3a</b>    | sodium channel, voltage-gated, type III, alpha                            | 1.96 | 1.95 | 2.69E-05 | 6.55E-04 | NM_018732                           | NM_018732                           | NM_018732                           | Mm.330256 | 20269  | ENSMUST0000010069  |
| A_55_P2072333 | <b>Scn8a</b>    | sodium channel, voltage-gated, type VIII, alpha                           | 0.27 | 2.41 | 5.15E-07 | 7.41E-05 | NM_00107745NM_00107745NM_00107745NM | NM_00107745NM_00107745NM_00107745NM | NM_00107745NM_00107745NM_00107745NM | Mm.385012 | 20273  | ENSMUST00000108909 |
| A_55_P2040748 | <b>Scrb1</b>    | scribbled homolog (Drosophila)                                            | 0.78 | 1.72 | 2.82E-05 | 6.72E-04 | NM_134089                           | NM_134089                           | NM_134089                           | Mm.25568  | 105782 | ENSMUST00000109946 |
| A_55_P2002562 | <b>Sec11a</b>   | SEC11 homolog A (S. cerevisiae)                                           | 1.04 | 2.05 | 2.22E-06 | 1.50E-04 | NM_019951                           | NM_019951                           | NM_019951                           | Mm.43760  | 56529  | ENSMUST00000147813 |
| A_55_P1962736 | <b>Sec23b</b>   | SEC23B (S. cerevisiae)                                                    | 0.81 | 1.76 | 2.25E-05 | 5.90E-04 | NM_019787                           | NM_019787                           | NM_019787                           | Mm.248492 | 27054  | ENSMUST0000028916  |
| A_51_P477440  | <b>Sec23ip</b>  | Sec23 interacting protein                                                 | 0.77 | 1.71 | 4.06E-05 | 8.41E-04 | NM_00102998NM_00102998NM_00102998NM | NM_00102998NM_00102998NM_00102998NM | NM_00102998NM_00102998NM_00102998NM | Mm.297105 | 207352 | ENSMUST0000042942  |
| A_55_P2024575 | <b>Sec24c</b>   | SEC24 related gene family, member C (S. cerevisiae)                       | 0.48 | 1.39 | 9.18E-05 | 1.43E-03 | NM_172596                           | NM_172596                           | NM_172596                           | Mm.173119 | 218811 | ENSMUST0000048657  |
| A_51_P129100  | <b>Sec63</b>    | SEC63-like (S. cerevisiae)                                                | 0.79 | 1.73 | 9.03E-06 | 3.47E-04 | NM_153055                           | NM_153055                           | NM_153055                           | Mm.214344 | 140740 | ENSMUST00000124613 |
| A_55_P2054013 | <b>Sema3a</b>   | sema domain, immunoglobulin domain (Ig), short basic domain               | 1.67 | 3.19 | 1.43E-07 | 4.10E-05 | NM_009152                           | NM_009152                           | NM_009152                           | Mm.372039 | 20346  | ENSMUST00000905012 |
| A_55_P2103026 | <b>Sema3d</b>   | sema domain, immunoglobulin domain (Ig), short basic domain               | 1.98 | 1.97 | 2.64E-06 | 1.65E-04 | NM_028882                           | NM_028882                           | NM_028882                           | Mm.893133 | 108151 | ENSMUST0000030868  |
| A_51_P462516  | <b>Senp7</b>    | SUMO1/sentinin specific peptidase 7                                       | 0.92 | 1.89 | 9.31E-06 | 3.54E-04 | NM_00100397NM_00100397NM_00100397NM | NM_00100397NM_00100397NM_00100397NM | NM_00100397NM_00100397NM_00100397NM | Mm.255784 | 66315  | ENSMUST0000049128  |
| A_51_P213433  | <b>Seps1</b>    | selenophosphate synthetase 1                                              | 0.57 | 1.49 | 4.89E-05 | 9.53E-04 | NM_175400                           | NM_175400                           | NM_175400                           | Mm.34329  | 190979 | ENSMUST00000115019 |
| A_52_P153327  | <b>Sept2</b>    | septin 2                                                                  | 0.97 | 1.96 | 1.03E-06 | 1.02E-04 | NM_010891                           | NM_010891                           | NM_010891                           | Mm.426652 | 18000  | ENSMUST00000131175 |
| A_55_P2109554 | <b>Serinc3</b>  | serine incorporator 3                                                     | 0.83 | 1.78 | 3.86E-05 | 8.13E-04 | NM_012032                           | NM_012032                           | NM_012032                           | Mm.218473 | 26943  | ENSMUST0000017851  |
| A_51_P128336  | <b>Serinc5</b>  | serine incorporator 5                                                     | 0.86 | 1.81 | 1.99E-05 | 5.48E-04 | NM_172588                           | NM_172588                           | NM_172588                           | Mm.297970 | 218420 | ENSMUST0000049488  |
| A_51_P268094  | <b>Serpin2</b>  | serine (or cysteine) peptidase inhibitor, clade E, member 2               | 0.86 | 1.81 | 8.86E-05 | 1.40E-03 | NM_009255                           | NM_009255                           | NM_009255                           | Mm.3093   | 20742  | ENSMUST0000027467  |
| A_66_P100165  | <b>Serpin1</b>  | serine (or cysteine) peptidase inhibitor, clade I, member 1               | 1.23 | 2.34 | 1.47E-05 | 4.60E-04 | NM_009250                           | NM_009250                           | NM_009250                           | Mm.41560  | 20713  | ENSMUST00000161776 |
| A_52_P230167  | <b>Setb1</b>    | SET binding protein                                                       | 0.91 | 1.88 | 3.06E-05 | 7.08E-04 | NM_053099                           | NM_053099                           | NM_053099                           | Mm.312871 | 204027 | ENSMUST0000025430  |
| A_52_P468033  | <b>Setd1b</b>   | SET domain containing 1B                                                  | 0.87 | 1.83 | 1.70E-05 | 4.98E-04 | NM_00104039NM_00104039NM_00104039NM | NM_00104039NM_00104039NM_00104039NM | NM_00104039NM_00104039NM_00104039NM | Mm.250391 | 280403 | ENSMUST00000174836 |
| A_51_P110395  | <b>Setd2</b>    | SET domain containing 2                                                   | 1.23 | 2.35 | 1.64E-06 | 1.26E-04 | NM_00108134NM_00108134NM_00108134NM | NM_00108134NM_00108134NM_00108134NM | NM_00108134NM_00108134NM_00108134NM | Mm.288949 | 235626 | ENSMUST00000173373 |
| A_55_P1965635 | <b>Setd1b</b>   | SET domain, bifurcated 1                                                  | 2.10 | 4.28 | 1.23E-06 | 1.10E-04 | NM_00116364NM_00116364NM_00116364NM | NM_00116364NM_00116364NM_00116364NM | NM_00116364NM_00116364NM_00116364NM | Mm.490259 | 84505  | ENSMUST00000124638 |
| A_51_P470448  | <b>Setx</b>     | senataxin                                                                 | 1.11 | 2.16 | 9.27E-06 | 3.53E-04 | NM_198033                           | NM_198033                           | NM_198033                           | Mm.41867  | 269254 | ENSMUST0000061578  |
| A_55_P2118744 | <b>Sez1</b>     | seizure related 6 homolog like                                            | 1.24 | 2.36 | 2.10E-07 | 4.78E-05 | NM_00125391NM_00125391NM_00125391NM | NM_00125391NM_00125391NM_00125391NM | NM_00125391NM_00125391NM_00125391NM | Mm.143742 | 65747  | ENSMUST0000079491  |
| A_51_P504442  | <b>Sf3a1</b>    | splicing factor 3a, subunit 1                                             | 0.67 | 1.59 | 6.44E-05 | 1.13E-03 | NM_026175                           | NM_026175                           | NM_026175                           | Mm.159914 | 67465  | ENSMUST0000002198  |
| A_66_P108345  | <b>Sgcb</b>     | sarcoglycan, beta (dystrophin-associated glycoprotein)                    | 0.91 | 1.88 | 1.53E-05 | 4.70E-04 | NM_011890                           | NM_011890                           | NM_011890                           | Mm.89310  | 24051  | ENSMUST00000081170 |
| A_55_P1984730 | <b>Sgpl1</b>    | sphingosine phosphate lyase 1                                             | 0.76 | 1.69 | 7.86E-05 | 1.29E-03 | NM_009163                           | NM_009163                           | NM_009163                           | Mm.412319 | 20387  | ENSMUST00000122579 |
| A_55_P2088705 | <b>Sgsm1</b>    | small G protein signaling modulator 1                                     | 0.85 | 1.80 | 5.95E-04 | 3.54E-04 | NM_00125473NM_00125473NM_00125473NM | NM_00125473NM_00125473NM_00125473NM | NM_00125473NM_00125473NM_00125473NM | Mm.200203 | 52090  | ENSMUST00000145708 |
| A_55_P2130249 | <b>Sh3g2</b>    | SH3-domain GRB2-like 2                                                    | 1.09 | 1.73 | 9.48E-05 | 1.46E-03 | NM_019535                           | NM_019535                           | NM_019535                           | Mm.143603 | 20404  | ENSMUST00000107188 |
| A_55_P2062181 | <b>Shank1</b>   | SH3/ankyrin domain gene 1                                                 | 0.75 | 2.07 | 4.86E-05 | 9.48E-04 | ENSMUST0000                         | AK078290                            | AK078290                            | Mm.306038 | 243961 | ENSMUST00000154776 |
| A_55_P2051656 | <b>Shank2</b>   | SH3/ankyrin domain gene 2                                                 | 0.88 | 1.85 | 1.34E-05 | 4.33E-04 | NM_00111337NM_00111337NM_00111337NM | NM_00111337NM_00111337NM_00111337NM | NM_00111337NM_00111337NM_00111337NM | Mm.483624 | 210274 | ENSMUST0000097929  |
| A_55_P2154749 | <b>Shisa6</b>   | shisa homolog 6 (Xenopus laevis)                                          | 0.72 | 1.85 | 2.78E-05 | 6.68E-04 | NM_00103487NM_00103487NM_00103487NM | NM_00103487NM_00103487NM_00103487NM | NM_00103487NM_00103487NM_00103487NM | Mm.351764 | 380702 | ENSMUST00000123454 |
| A_55_P2153541 | <b>Sik3</b>     | SIK family kinase 3                                                       | 1.74 | 1.68 | 3.72E-05 | 7.68E-04 | NM_027498                           | NM_027498                           | NM_027498                           | Mm.219459 | 70661  | ENSMUST00000126865 |
| A_55_P2112693 | <b>Sipa11f</b>  | signal-induced proliferation-associated 1 like 1                          | 2.33 | 5.02 | 7.17E-08 | 2.87E-05 | NM_00116798NM_00116798NM_00116798NM | NM_00116798NM_00116798NM_00116798NM | NM_00116798NM_00116798NM_00116798NM | Mm.261333 | 217692 | ENSMUST00000166429 |
| A_55_P2098782 | <b>Sipa12f</b>  | signal-induced proliferation-associated 1 like 2                          | 1.05 | 2.08 | 1.95E-05 | 5.42E-04 | AK122501                            | 0                                   | AK122501                            | Mm.271668 | 244668 | 0                  |
| A_55_P1975732 | <b>Sipa13f</b>  | signal-induced proliferation-associated 1 like 3                          | 0.62 | 1.54 | 1.28E-04 | 1.78E-03 | NM_00108102NM_00108102NM_00108102NM | NM_00108102NM_00108102NM_00108102NM | NM_00108102NM_00108102NM_00108102NM | Mm.375176 | 74206  | ENSMUST0000085809  |
| A_55_P243914  | <b>Skap2</b>    | src family associated phosphoprotein 2                                    | 0.85 | 1.80 | 1.61E-05 | 4.83E-04 | NM_018773                           | NM_018773                           | NM_018773                           | Mm.221479 | 54353  | ENSMUST0000078214  |
| A_51_P181132  | <b>Skil</b>     | SKI-like                                                                  | 0.75 | 1.68 | 8.13E-06 | 3.27E-04 | NM_011386                           | NM_011386                           | NM_011386                           | Mm.15406  | 20482  | ENSMUST0000029194  |
| A_52_P614960  | <b>Skiv2l</b>   | superkiller viralicidic activity 2-like (S. cerevisiae)                   | 1.26 | 2.39 | 2.07E-06 | 1.44E-04 | NM_021337                           | NM_021337                           | NM_021337                           | Mm.18845  | 180777 | ENSMUST00000174363 |
| A_51_P476711  | <b>Skiv2l2</b>  | superkiller viralicidic activity 2-like 2 (S. cerevisiae)                 | 1.42 | 2.32 | 3.72E-06 | 3.06E-04 | NM_028151                           | NM_028151                           | NM_028151                           | Mm.291029 | 27198  | ENSMUST0000022281  |
| A_55_P1953874 | <b>Skor2</b>    | SKI family transcriptional corepressor 2                                  | 0.99 | 1.99 | 1.18E-05 | 4.01E-04 | NM_00110974NM_00110974NM_00110974NM | NM_00110974NM_00110974NM_00110974NM | NM_00110974NM_00110974NM_00110974NM | Mm.329543 | 664805 | ENSMUST00000168956 |
| A_55_P2087544 | <b>Slc12a5</b>  | solute carrier family 12, member 5                                        | 1.55 | 2.92 | 9.28E-06 | 3.53E-04 | NM_020333                           | NM_020333                           | NM_020333                           | Mm.252987 | 57138  | ENSMUST0000090902  |
| A_55_P1972252 | <b>Slc12a6</b>  | solute carrier family 12, member 6                                        | 1.15 | 2.21 | 1.58E-05 | 4.79E-04 | NM_133649                           | NM_133649                           | NM_133649                           | Mm.46449  | 107723 | ENSMUST00000110991 |
| A_52_P307752  | <b>Slc12a9</b>  | solute carrier family 12 (potassium/chloride transporters), member 9      | 1.05 | 2.06 | 8.18E-07 | 9.27E-05 | NM_031406                           | NM_031406                           | NM_031406                           | Mm.235625 | 83704  | ENSMUST0000033991  |
| A_55_P2044242 | <b>Slc13a5</b>  | solute carrier family 13 (sodium-dependent citrate transporter), member 5 | 0.56 | 1.48 | 7.42E-05 | 1.24E-03 | NM_00100414NM_00100414NM_00100414NM | NM_00100414NM_00100414NM_00100414NM | NM_00100414NM_00100414NM_00100414NM | Mm.340778 | 237831 | ENSMUST0000021161  |
| A_51_P312336  | <b>Slc14a1</b>  | solute carrier family 14 (urea transporter), member 1                     | 0.85 | 1.80 | 7.43E-05 | 1.24E-03 | NM_028122                           | NM_028122                           | NM_028122                           | Mm.38382  | 108052 | ENSMUST00000160639 |
| A_51_P267278  | <b>Slc15a2</b>  | solute carrier family 15 (H+/peptide transporter), member 2               | 0.96 | 1.95 | 1.55E-05 | 4.74E-04 | NM_021301                           | NM_021301                           | NM_021301                           | Mm.281804 | 57738  | ENSMUST0000023616  |
| A_52_P586129  | <b>Slc16a14</b> | solute carrier family 16 (monocarboxylic acid transporters), member 14    | 0.96 | 1.95 | 9.67E-06 | 3.61E-04 | NM_027921                           | NM_027921                           | NM_027921                           | Mm.158764 | 71781  | ENSMUST0000027432  |
| A_52_P408736  | <b>Slc16a7</b>  | solute carrier family 16 (monocarboxylic acid transporters), member 7     | 0.92 | 1.89 | 1.02E-05 | 3.72E-04 | ENSMUST0000                         | AK085398                            | AK085398                            | Mm.29161  | 20503  | ENSMUST0000045218  |
| A_51_P493117  | <b>Slc16a9</b>  | solute carrier family 16 (monocarboxylic acid transporters), member 9     | 1    |      |          |          |                                     |                                     |                                     |           |        |                    |



|               |                  |                                                                |      |      |          |          |             |             |             |           |        |                   |
|---------------|------------------|----------------------------------------------------------------|------|------|----------|----------|-------------|-------------|-------------|-----------|--------|-------------------|
| A_52_085791   | <b>Slc9a7</b>    | solute carrier family 9 (sodium/hydrogen exchanger), member    | 1,74 | 3,34 | 5,50E-07 | 7,71E-05 | NM_177353   | NM_177353   | NM_177353   | Mm.132983 | 236727 | ENSMUST0000068892 |
| A_52_029696   | <b>Slc9a8</b>    | solute carrier family 9 (sodium/hydrogen exchanger), member    | 0,76 | 1,69 | 2,66E-06 | 1,66E-04 | NM_148929   | NM_148929   | NM_148929   | Mm.278924 | 77031  | ENSMUST0000068893 |
| A_52_037523   | <b>Slc9a9</b>    | solute carrier family 9 (sodium/hydrogen exchanger), member    | 0,84 | 1,79 | 7,58E-05 | 1,25E-03 | NM_177909   | NM_177909   | NM_177909   | Mm.326125 | 51804  | ENSMUST0000068894 |
| A_55_2185832  | <b>Sloc1c1</b>   | solute carrier organic anion transporter family, member 1c1    | 1,75 | 3,36 | 1,11E-07 | 3,65E-05 | NM_021471   | NM_021471   | NM_021471   | Mm.284495 | 38007  | ENSMUST0000068895 |
| A_55_01989703 | <b>Sloc2a1</b>   | solute carrier organic anion transporter family, member 2a1    | 0,53 | 1,44 | 1,08E-04 | 1,59E-03 | NM_033314   | NM_033314   | NM_033314   | Mm.207130 | 24059  | ENSMUST0000068897 |
| A_55_01958394 | <b>Slit2</b>     | slit homolog 2 (Drosophila)                                    | 0,77 | 1,71 | 7,00E-06 | 2,98E-04 | NM_178804   | NM_178804   | NM_178804   | Mm.289739 | 36063  | ENSMUST0000068898 |
| A_51_0301809  | <b>Slit3</b>     | slit homolog 3 (Drosophila)                                    | 1,18 | 2,26 | 5,10E-07 | 7,35E-05 | NM_011412   | NM_011412   | NM_011412   | Mm.478604 | 20664  | ENSMUST0000068899 |
| A_51_0141012  | <b>Slitrl1</b>   | SLIT and NTRK-like family, member 1                            | 0,74 | 1,67 | 1,04E-04 | 1,55E-03 | NM_199065   | NM_199065   | NM_199065   | Mm.257268 | 76965  | ENSMUST0000068900 |
| A_52_0462125  | <b>Smarca5p5</b> | SWI/SNF related, matrix associating, actin dependent regulator | 1,14 | 2,21 | 1,42E-05 | 4,50E-04 | NR_002888   | NR_002888   | NR_002888   | Mm.389595 | 545700 | ENSMUST0000068901 |
| A_66_0116804  | <b>Smchd1</b>    | SMC hinge domain containing 1                                  | 1,47 | 2,77 | 2,63E-07 | 5,52E-05 | NM_028887   | NM_028887   | NM_028887   | Mm.194450 | 74355  | ENSMUST0000068902 |
| A_52_0171791  | <b>Smg1</b>      | SMG1 homolog, phosphatidylinositol 3-kinase-related kinase     | 0,83 | 1,78 | 9,78E-05 | 1,50E-03 | NM_00103181 | NM_00103181 | NM_00103181 | Mm.309053 | 233789 | ENSMUST0000068904 |
| A_66_0137654  | <b>Smpd2</b>     | sphingomyelin phosphodiesterase 2, neutral                     | 0,91 | 1,87 | 4,49E-05 | 9,00E-04 | NM_009213   | NM_009213   | NM_009213   | Mm.953    | 20598  | ENSMUST0000068905 |
| A_51_0479786  | <b>Smt1</b>      | smoothelin                                                     | 1,26 | 2,39 | 8,63E-08 | 3,10E-05 | NM_013870   | NM_013870   | NM_013870   | Mm.188516 | 29856  | ENSMUST0000068906 |
| A_55_02007525 | <b>Smu1</b>      | smu-1 suppressor of mec-8 and unc-52 homolog (C. elegans)      | 0,85 | 1,80 | 5,32E-05 | 1,01E-03 | NM_021535   | NM_021535   | NM_021535   | Mm.289929 | 74255  | ENSMUST0000068907 |
| A_52_0600030  | <b>Smyd3</b>     | SET and MYND domain containing 3                               | 0,91 | 1,87 | 5,66E-05 | 1,04E-03 | NM_027188   | NM_027188   | NM_027188   | Mm.222338 | 69726  | ENSMUST0000068908 |
| A_55_02029151 | <b>Snap47</b>    | synaptosomal-associated protein, 47                            | 1,34 | 2,53 | 1,93E-06 | 1,39E-04 | NM_144521   | NM_144521   | NM_144521   | Mm.26680  | 67826  | ENSMUST0000068909 |
| A_52_0467140  | <b>Snd1</b>      | staphylococcal nuclease and tudor domain containing 1          | 1,22 | 2,33 | 1,90E-05 | 5,34E-04 | NM_019776   | NM_019776   | NM_019776   | Mm.439987 | 58463  | ENSMUST0000068910 |
| A_55_02086677 | <b>Snrk</b>      | SNF related kinase                                             | 0,61 | 1,52 | 3,83E-05 | 8,02E-04 | ENSMUST0000 | AK082185    |             | Mm.257989 | 26623  | ENSMUST0000068911 |
| A_55_02120682 | <b>Snrpa1</b>    | small nuclear ribonucleoprotein polypeptide A'                 | 0,72 | 1,65 | 5,47E-05 | 1,02E-03 | NM_021336   | NM_021336   | NM_021336   | Mm.22362  | 60981  | ENSMUST0000068912 |
| A_66_0111877  | <b>Snrx13</b>    | sorting nexin 13                                               | 0,91 | 1,87 | 4,84E-05 | 9,48E-04 | NM_00101497 | NM_00101497 | NM_00101497 | Mm.213991 | 217463 | ENSMUST0000068913 |
| A_52_0274555  | <b>Snrx14</b>    | sorting nexin 14                                               | 0,72 | 1,64 | 2,29E-05 | 5,96E-04 | NM_172926   | NM_172926   | NM_172926   | Mm.439873 | 244662 | ENSMUST0000068915 |
| A_55_01975695 | <b>Snrx18</b>    | sorting nexin 18                                               | 0,73 | 1,66 | 8,50E-06 | 3,35E-04 | NM_130796   | NM_130796   | NM_130796   | Mm.33721  | 107625 | ENSMUST0000068916 |
| A_55_01957389 | <b>Snrx25</b>    | sorting nexin 25                                               | 0,52 | 1,44 | 1,36E-05 | 1,23E-03 | NM_207213   | NM_207213   | NM_207213   | Mm.267258 | 102141 | ENSMUST0000068917 |
| A_55_02065726 | <b>Snrx29</b>    | sorting nexin 29                                               | 1,35 | 2,56 | 8,16E-07 | 9,25E-05 | ENSMUST0000 | AK086665    |             | Mm.325831 | 74478  | ENSMUST0000068918 |
| A_55_01952788 | <b>Son</b>       | Son DNA binding protein                                        | 1,44 | 2,71 | 6,55E-07 | 8,34E-05 | ENSMUST0000 | AB546195    |             | Mm.46401  | 20658  | ENSMUST0000068920 |
| A_55_01960857 | <b>Sorbs2</b>    | sorbin and SH3 domain containing 2                             | 1,79 | 3,47 | 9,72E-05 | 1,49E-03 | NM_00120521 | NM_00120521 | NM_00120521 | Mm.211096 | 234214 | ENSMUST0000068921 |
| A_55_02044587 | <b>Sorcs1</b>    | VPS10 domain receptor protein SORCS 1                          | 0,66 | 1,58 | 5,45E-05 | 1,02E-03 | NM_0012525C | NM_0012525C | NM_0012525C | Mm.313672 | 58178  | ENSMUST0000068922 |
| A_55_02042151 | <b>Sorcs2</b>    | sorfin-like related VPS10 domain containing receptor 2         | 1,44 | 2,71 | 9,92E-07 | 1,00E-04 | NM_030889   | NM_030889   | NM_030889   | Mm.34113  | 81840  | ENSMUST0000068923 |
| A_66_0123824  | <b>Sorrl1</b>    | sorlin-related receptor, LDLR class A repeats-containing       | 1,49 | 2,81 | 4,72E-07 | 7,16E-05 | ENSMUST0000 | AK162665    |             | Mm.21920  | 20660  | ENSMUST0000068925 |
| A_51_0517145  | <b>Sorrl1</b>    | sorlin1                                                        | 0,93 | 1,90 | 6,41E-05 | 1,13E-03 | NM_019972   | NM_019972   | NM_019972   | Mm.157119 | 20661  | ENSMUST0000068927 |
| A_52_0475356  | <b>Sov6</b>      | SRV-box containing gene 6                                      | 1,08 | 2,11 | 9,90E-05 | 1,51E-03 | NM_011445   | NM_011445   | NM_011445   | Mm.323365 | 29928  | ENSMUST0000068928 |
| A_51_0513530  | <b>Spag5</b>     | sperm associated antigen 5                                     | 1,01 | 2,01 | 2,64E-05 | 6,49E-04 | NM_017407   | NM_017407   | NM_017407   | Mm.24250  | 54141  | ENSMUST0000068929 |
| A_55_02046807 | <b>Sparc</b>     | secreted acidic cysteine rich glycoprotein                     | 0,83 | 1,78 | 3,74E-05 | 7,96E-04 | NM_009242   | NM_009242   | NM_009242   | Mm.291442 | 20692  | ENSMUST0000068930 |
| A_66_01122828 | <b>Spata31</b>   | spermatogenesis associated 31                                  | 0,65 | 1,57 | 2,21E-05 | 5,85E-04 | NM_030047   | NM_030047   | NM_030047   | Mm.342895 | 78124  | ENSMUST0000068931 |
| A_55_01955279 | <b>Spcc1</b>     | sperm antigen with calponin homology and coiled-coil domain    | 1,26 | 2,39 | 1,25E-06 | 1,11E-04 | NM_00102993 | NM_00102993 | NM_00102993 | Mm.458025 | 432572 | ENSMUST0000068932 |
| A_55_02087162 | <b>Spcc11</b>    | sperm antigen with calponin homology and coiled-coil domain    | 1,29 | 2,39 | 3,20E-06 | 1,87E-04 | NM_00114582 | NM_00114582 | NM_00114582 | Mm.27716  | 74392  | ENSMUST0000068934 |
| A_55_02009943 | <b>Spem</b>      | SPEN homolog, transcriptional regulator (Drosophila)           | 1,23 | 2,35 | 1,27E-07 | 3,94E-05 | NM_019763   | NM_019763   | NM_019763   | Mm.299906 | 56381  | ENSMUST0000068935 |
| A_55_02033849 | <b>Sphkap</b>    | SPHK1 interactor, AKAP domain containing                       | 1,39 | 2,63 | 3,36E-06 | 1,92E-04 | NM_172430   | NM_172430   | NM_172430   | Mm.154303 | 77629  | ENSMUST0000068936 |
| A_55_02082837 | <b>Spin1</b>     | spindlin 1                                                     | 0,73 | 1,65 | 4,81E-05 | 9,44E-04 | NM_146043   | NM_146043   | NM_146043   | Mm.188432 | 20729  | ENSMUST0000068938 |
| A_55_02081253 | <b>Spock3</b>    | sparc/osteonectin, cwcv and kazal-like domains proteoglycan    | 0,68 | 1,60 | 8,16E-05 | 1,32E-03 | NM_023689   | NM_023689   | NM_023689   | Mm.334552 | 72902  | ENSMUST0000068940 |
| A_51_0151902  | <b>Spond1</b>    | spondin 1, (f-spondin) extracellular matrix protein            | 1,40 | 2,63 | 1,16E-05 | 3,98E-04 | NM_145584   | NM_145584   | NM_145584   | Mm.334160 | 233744 | ENSMUST0000068941 |
| A_55_02085142 | <b>Spp1</b>      | secreted phosphoprotein 1                                      | 0,81 | 1,75 | 1,20E-04 | 1,71E-03 | NM_00120423 | NM_00120423 | NM_00120423 | Mm.288474 | 20750  | ENSMUST0000068942 |
| A_55_02072985 | <b>Sptan1</b>    | spectrin alpha, non-erythrocytic 1                             | 2,62 | 6,15 | 5,83E-09 | 8,90E-06 | NM_00107655 | NM_00107655 | NM_00107655 | Mm.204969 | 20740  | ENSMUST0000068943 |
| A_51_0489138  | <b>Sptb</b>      | spectrin beta, erythrocytic                                    | 1,56 | 2,94 | 4,43E-07 | 6,97E-05 | NM_013675   | NM_013675   | NM_013675   | Mm.32881  | 20741  | ENSMUST0000068945 |
| A_55_02081223 | <b>Sptbn1</b>    | spectrin beta, non-erythrocytic 1                              | 3,08 | 8,48 | 5,18E-10 | 4,08E-06 | NM_175836   | NM_175836   | NM_175836   | Mm.123110 | 20742  | ENSMUST0000068946 |
| A_51_0403799  | <b>Sptbn2</b>    | spectrin beta, non-erythrocytic 2                              | 2,80 | 6,97 | 2,84E-09 | 6,40E-06 | NM_021287   | NM_021287   | NM_021287   | Mm.329668 | 20743  | ENSMUST0000068948 |
| A_55_02075966 | <b>Sptbn4</b>    | spectrin beta, non-erythrocytic 4                              | 1,33 | 2,51 | 7,20E-07 | 8,85E-05 | NM_032610   | NM_032610   | NM_032610   | Mm.459123 | 80297  | ENSMUST0000068949 |
| A_51_0345593  | <b>Sptlc1</b>    | serine palmitoyltransferase, long chain base subunit 1         | 1,03 | 2,04 | 2,24E-05 | 5,90E-04 | NM_009269   | NM_009269   | NM_009269   | Mm.240336 | 268656 | ENSMUST0000068950 |
| A_51_0321331  | <b>Sptlc2</b>    | serine palmitoyltransferase, long chain base subunit 2         | 0,63 | 1,55 | 4,57E-05 | 9,11E-04 | NM_011479   | NM_011479   | NM_011479   | Mm.565    | 20773  | ENSMUST0000068951 |
| A_52_025420   | <b>Srcin1</b>    | SRC kinase signaling inhibitor 1                               | 0,64 | 1,56 | 2,75E-05 | 6,63E-04 | NM_018873   | NM_018873   | NM_018873   | Mm.342665 | 56013  | ENSMUST0000068952 |
| A_55_02042510 | <b>Srgap1</b>    | SLIT-ROBO Rho GTPase activating protein 1                      | 0,95 | 1,93 | 3,13E-05 | 7,15E-04 | NM_00108103 | NM_00108103 | NM_00108103 | Mm.288698 | 117600 | ENSMUST0000068953 |
| A_52_0112178  | <b>Srgap2</b>    | SLIT-ROBO Rho GTPase activating protein 2                      | 1,45 | 2,73 | 4,22E-06 | 2,19E-04 | NM_00108101 | NM_00108101 | NM_00108101 | Mm.276259 | 14270  | ENSMUST0000068956 |
| A_55_02137736 | <b>Srgap3</b>    | SLIT-ROBO Rho GTPase activating protein 3                      | 0,85 | 1,80 | 9,56E-05 | 1,47E-03 | NM_080448   | NM_080448   | NM_080448   | Mm.236401 | 259302 | ENSMUST0000068957 |
| A_52_0279184  | <b>Srp54a</b>    | signal recognition particle 54A                                | 1,11 | 2,16 | 3,92E-05 | 8,20E-04 | NM_011899   | NM_011899   | NM_011899   | Mm.471968 | 24067  | ENSMUST0000068959 |
| A_55_02166592 | <b>Srrm2</b>     | serine/arginine repetitive motif 2                             | 1,04 | 2,06 | 1,74E-06 | 1,31E-04 | NM_175229   | NM_175229   | NM_175229   | Mm.5222   | 75956  | ENSMUST0000068960 |
| A_51_0420236  | <b>Srrt</b>      | serrate RNA effector molecule homolog (Arabidopsis)            | 0,66 | 1,58 | 9,74E-05 | 1,49E-03 | NM_031405   | NM_031405   | NM_031405   | Mm.387734 | 83701  | ENSMUST0000068962 |
| A_66_0125071  | <b>Ssb</b>       | Sjogren syndrome antigen B                                     | 0,86 | 1,82 | 4,34E-05 | 8,80E-04 | NM_009278   | NM_009278   | NM_009278   | Mm.105530 | 20803  | ENSMUST0000068963 |
| A_55_02403135 | <b>Sh2</b>       | shingshot homolog 2 (Drosophila)                               | 1,10 | 4,29 | 2,15E-07 | 4,80E-05 | NM_177710   | NM_177710   | NM_177710   | Mm.440381 | 237860 | ENSMUST0000068964 |
| A_51_0314264  | <b>Ssr2</b>      | signal sequence receptor, beta                                 | 2,02 | 2,03 | 1,18E-05 | 4,00E-04 | NM_025448   | NM_025448   | NM_025448   | Mm.7091   | 66256  | ENSMUST0000068966 |
| A_52_0312398  | <b>Ssr3</b>      | signal sequence receptor, gamma                                | 0,69 | 1,62 | 8,53E-06 | 3,35E-04 | NM_026155   | NM_026155   | NM_026155   | Mm.327238 | 67347  | ENSMUST0000068967 |
| A_52_0546090  | <b>Ssr4</b>      | signal sequence receptor, delta                                | 0,81 | 1,76 | 9,52E-06 | 3,58E-04 | NM_009279   | NM_009279   | NM_009279   | Mm.831    | 20432  | ENSMUST0000068968 |
| A_51_0432950  | <b>Sstr1</b>     | somatostatin receptor 1                                        | 0,98 | 1,98 | 4,82E-07 | 7,22E-05 | NM_009216   | NM_009216   | NM_009216   | Mm.278336 | 20605  | ENSMUST0000068969 |
| A_51_0129546  | <b>Sstr4</b>     | somatostatin receptor 4                                        | 1,13 | 2,19 | 2,39E-06 | 1,57E-04 | NM_009219   | NM_009219   | NM_009219   | Mm.35324  | 20608  | ENSMUST0000068971 |
| A_51_0352594  | <b>St5</b>       | suppression of tumorigenicity 5                                | 1,60 | 3,04 | 2,30E-08 | 1,66E-05 | NM_00100132 | NM_00100132 | NM_00100132 | Mm.252009 | 76954  | ENSMUST0000068972 |
| A_51_0101375  | <b>St6gal1</b>   | beta galactosidase alpha 2,6 sialyltransferase 1               | 0,58 | 1,49 | 3,22E-05 | 7,27E-04 | NM_145933   | NM_145933   | NM_145933   | Mm.149029 | 20440  | ENSMUST0000068973 |
| A_51_0232371  | <b>Stab1</b>     | stabilin 1                                                     | 0,99 | 1,99 | 2,96E-06 | 1,79E-04 | NM_138672   | NM_138672   | NM_138672   | Mm.220821 |        |                   |



|                |                 |                                                                  |      |      |          |          |             |             |             |           |           |                   |                   |
|----------------|-----------------|------------------------------------------------------------------|------|------|----------|----------|-------------|-------------|-------------|-----------|-----------|-------------------|-------------------|
| A_55_P2051293  | <i>Tbcd</i>     | tubulin-specific chaperone d                                     | 0,91 | 1,88 | 3,32E-05 | 7,41E-04 | NM_029878   | NM_029878   | NM_029878   | Mm.23686  | 108903    | ENSMUST0000069039 |                   |
| A_55_P2405129  | <i>Tbr1</i>     | T-box brain gene 1                                               | 0,88 | 1,84 | 8,41E-06 | 3,32E-04 | NM_009322   | NM_009322   | NM_009322   | Mm.30825  | 21375     | ENSMUST0000069041 |                   |
| A_55_P621567   | <i>Tcf20</i>    | transcription factor 20                                          | 1,15 | 2,23 | 7,06E-07 | 8,63E-05 | NM_00111414 | NM_00111414 | NM_00111414 | Mm.252156 | 21411     | ENSMUST0000069042 |                   |
| A_55_P2098061  | <i>Tchp</i>     | trichoplein, keratin filament binding                            | 0,76 | 1,70 | 2,07E-05 | 5,61E-04 | NM_029992   | NM_029992   | NM_029992   | Mm.23968  | 77832     | ENSMUST0000069043 |                   |
| A_51_P214861   | <i>Tcigr1</i>   | T cell, immune regulator 1, ATPase, H+ transporting, lysosom     | 0,99 | 1,99 | 4,17E-06 | 2,18E-04 | NM_016921   | NM_016921   | NM_016921   | Mm.27169  | 27060     | ENSMUST0000069044 |                   |
| A_51_P164030   | <i>Tcp1</i>     | t-complex protein 1                                              | 1,64 | 3,11 | 4,32E-08 | 2,20E-05 | NM_013686   | NM_013686   | NM_013686   | Mm.229342 | 21454     | ENSMUST0000069045 |                   |
| A_55_P1999834  | <i>Tenm1</i>    | teneurin transmembrane protein 1                                 | 1,94 | 3,84 | 1,42E-07 | 4,10E-05 | ENSMUST0000 |             |             | 0         | 0         | 23963             | ENSMUST0000069046 |
| A_55_P21011290 | <i>Tenm2</i>    | teneurin transmembrane protein 2                                 | 1,52 | 2,88 | 4,28E-06 | 2,21E-04 | NM_011856   | NM_011856   | NM_011856   | Mm.43989  | 23964     | ENSMUST0000069048 |                   |
| A_55_P2028971  | <i>Tenm3</i>    | teneurin transmembrane protein 3                                 | 1,20 | 2,29 | 9,38E-06 | 3,55E-04 | NM_011857   | NM_011857   | NM_011857   | Mm.42191  | 23965     | ENSMUST0000069049 |                   |
| A_55_P2141088  | <i>Tenm4</i>    | teneurin transmembrane protein 4                                 | 1,65 | 3,13 | 4,51E-08 | 2,22E-05 | ENSMUST0000 |             |             | 0         | 0         | 23966             | ENSMUST0000069051 |
| A_51_P506755   | <i>Tep1</i>     | telomerase associated protein 1                                  | 1,02 | 2,03 | 1,00E-04 | 1,52E-03 | NM_009351   | NM_009351   | NM_009351   | Mm.318736 | 21745     | ENSMUST0000069053 |                   |
| A_55_P1961320  | <i>Tes</i>      | testis derived transcript                                        | 2,32 | 5,01 | 6,83E-08 | 2,81E-05 | NM_207176   | NM_207176   | NM_207176   | Mm.436548 | 21753     | ENSMUST0000069054 |                   |
| A_52_P394539   | <i>Tex2</i>     | testis expressed gene 2                                          | 0,63 | 1,55 | 6,10E-05 | 1,09E-03 | NM_198292   | NM_198292   | NM_198292   | Mm.102407 | 21763     | ENSMUST0000069055 |                   |
| A_55_P1970097  | <i>Tex28</i>    | testis expressed 28                                              | 0,96 | 1,94 | 3,36E-06 | 1,92E-04 | NM_00112648 | NM_00112648 | NM_00112648 | Mm.475616 | 385380    | ENSMUST0000069056 |                   |
| A_51_P502348   | <i>Tip11</i>    | tuftsin interacting protein 11                                   | 0,91 | 1,88 | 2,95E-05 | 6,91E-04 | NM_018783   | NM_018783   | NM_018783   | Mm.172947 | 54723     | ENSMUST0000069057 |                   |
| A_51_P167876   | <i>Tfr</i>      | transferrin receptor                                             | 1,39 | 2,62 | 6,47E-06 | 2,85E-04 | NM_011638   | NM_011638   | NM_011638   | Mm.28883  | 22042     | ENSMUST0000069058 |                   |
| A_51_P212754   | <i>Tgfb1</i>    | transforming growth factor, beta induced                         | 0,73 | 1,66 | 2,51E-05 | 6,27E-04 | NM_009369   | NM_009369   | NM_009369   | Mm.14455  | 21810     | ENSMUST0000069056 |                   |
| A_65_P16059    | <i>Tgfb3</i>    | transforming growth factor, beta receptor III                    | 1,75 | 3,68 | 1,47E-04 | 1,95E-03 | NM_011578   | NM_011578   | NM_011578   | Mm.200775 | 21814     | ENSMUST0000069067 |                   |
| A_55_P2118575  | <i>Tgs1</i>     | trimethylguanosine synthase homolog (S. cerevisiae)              | 0,01 | 2,02 | 5,96E-06 | 2,72E-04 | NM_054089   | NM_054089   | NM_054089   | Mm.171323 | 116940    | ENSMUST0000069068 |                   |
| A_55_P2275402  | <i>Th</i>       | tyrosine hydroxylase                                             | 1,59 | 3,50 | 7,75E-05 | 1,27E-03 | NM_009377   | NM_009377   | NM_009377   | Mm.1292   | 21823     | ENSMUST0000069069 |                   |
| A_51_P461877   | <i>Thbs2</i>    | thrombospondin 2                                                 | 1,30 | 2,46 | 3,41E-06 | 1,94E-04 | NM_011581   | NM_011581   | NM_011581   | Mm.26688  | 21826     | ENSMUST0000069070 |                   |
| A_52_P401504   | <i>Thbs4</i>    | thrombospondin 4                                                 | 0,95 | 1,94 | 1,60E-05 | 4,82E-04 | NM_011582   | NM_011582   | NM_011582   | Mm.20865  | 21828     | ENSMUST0000069071 |                   |
| A_55_P2091201  | <i>Thns1f</i>   | threonine synthase-like 1 (bacterial)                            | 1,74 | 3,67 | 1,14E-05 | 3,95E-04 | NM_177588   | NM_177588   | NM_177588   | Mm.268841 | 208967    | ENSMUST0000069072 |                   |
| A_55_P2161219  | <i>Thsd7a</i>   | thrombospondin, type 1, domain containing 7A                     | 1,19 | 2,29 | 2,94E-06 | 1,79E-04 | NM_00103342 | NM_00103342 | NM_00103342 | Mm.259498 | 331401    | ENSMUST0000069073 |                   |
| A_51_P256066   | <i>Tiam2</i>    | T cell lymphoma invasion and metastasis 2                        | 0,97 | 1,95 | 8,99E-06 | 3,47E-04 | NM_011878   | NM_011878   | NM_011878   | Mm.137134 | 24001     | ENSMUST0000069077 |                   |
| A_52_P679101   | <i>Tjp2</i>     | tight junction protein 2                                         | 0,63 | 1,54 | 1,44E-04 | 1,93E-03 | NM_011597   | NM_011597   | NM_011597   | Mm.104744 | 21813     | ENSMUST0000069078 |                   |
| A_55_P2108599  | <i>Tlcd1</i>    | TLC domain containing 1                                          | 1,02 | 2,02 | 6,45E-06 | 2,85E-04 | NM_026708   | NM_026708   | NM_026708   | Mm.390375 | 68385     | ENSMUST0000069079 |                   |
| A_52_P451888   | <i>Tlk2</i>     | tousled-like kinase 2 (Arabidopsis)                              | 0,80 | 1,74 | 1,52E-04 | 1,99E-03 | NM_011903   | NM_011903   | NM_011903   | Mm.126976 | 24086     | ENSMUST0000069080 |                   |
| A_55_P1956973  | <i>Tln1</i>     | talin 1                                                          | 1,18 | 2,27 | 1,62E-06 | 1,25E-04 | NM_011602   | NM_011602   | NM_011602   | Mm.208601 | 21894     | ENSMUST0000069081 |                   |
| A_55_P2071834  | <i>Tln2</i>     | talin 2                                                          | 1,27 | 2,41 | 9,59E-08 | 3,25E-05 | NM_00108124 | NM_00108124 | NM_00108124 | Mm.38645  | 70549     | ENSMUST0000069083 |                   |
| A_51_P504588   | <i>Tm2d2</i>    | TM2 domain containing 2                                          | 0,82 | 1,77 | 3,09E-05 | 7,10E-04 | NM_027194   | NM_027194   | NM_027194   | Mm.28626  | 69742     | ENSMUST0000069085 |                   |
| A_55_P2032222  | <i>Tmsf2</i>    | transmembrane 9 superfamily member 2                             | 1,41 | 2,65 | 1,40E-05 | 4,46E-04 | NM_080556   | NM_080556   | NM_080556   | Mm.275191 | 68059     | ENSMUST0000069086 |                   |
| A_51_P368713   | <i>Tmbim4</i>   | transmembrane BAX inhibitor motif containing 4                   | 1,11 | 2,16 | 4,55E-06 | 2,29E-04 | NM_026617   | NM_026617   | NM_026617   | Mm.154726 | 62812     | ENSMUST0000069088 |                   |
| A_51_P454993   | <i>Tmcc2</i>    | transmembrane and coiled-coil domains 2                          | 0,59 | 1,50 | 1,05E-04 | 1,57E-03 | NM_178874   | NM_178874   | NM_178874   | Mm.273785 | 68875     | ENSMUST0000069089 |                   |
| A_55_P2038117  | <i>Tmem104</i>  | transmembrane protein 104                                        | 0,56 | 1,47 | 2,81E-05 | 6,72E-04 | NM_00103339 | NM_00103339 | NM_00103339 | Mm.260587 | 320534    | ENSMUST0000069090 |                   |
| A_52_P429749   | <i>Tmem115</i>  | transmembrane protein 115                                        | 0,67 | 1,59 | 1,03E-04 | 1,54E-03 | NM_019704   | NM_019704   | NM_019704   | Mm.260165 | 56395     | ENSMUST0000069091 |                   |
| A_51_P375693   | <i>Tmem135</i>  | transmembrane protein 135                                        | 0,92 | 1,89 | 7,35E-05 | 1,23E-03 | NM_028343   | NM_028343   | NM_028343   | Mm.208443 | 72759     | ENSMUST0000069092 |                   |
| A_52_P515094   | <i>Tmem176a</i> | transmembrane protein 176A                                       | 1,12 | 2,17 | 2,89E-06 | 1,76E-04 | NM_025326   | NM_025326   | NM_025326   | Mm.27061  | 66058     | ENSMUST0000069093 |                   |
| A_66_P111322   | <i>Tmem178b</i> | transmembrane protein 178B                                       | 0,93 | 1,90 | 1,04E-04 | 1,55E-03 | NM_00100418 | NM_00100418 | NM_00100418 | Mm.310029 | 344008    | ENSMUST0000069096 |                   |
| A_51_P392090   | <i>Tmem19</i>   | transmembrane protein 19                                         | 0,62 | 1,53 | 6,37E-05 | 1,13E-03 | NM_133683   | NM_133683   | NM_133683   | Mm.29647  | 67226     | ENSMUST0000069097 |                   |
| A_55_P2183622  | <i>Tmem201</i>  | transmembrane protein 201                                        | 0,59 | 1,51 | 1,44E-04 | 1,93E-03 | NM_177672   | NM_177672   | NM_177672   | Mm.266704 | 230917    | ENSMUST0000069098 |                   |
| A_55_P2444965  | <i>Tmem245</i>  | transmembrane protein 245                                        | 0,88 | 1,84 | 4,19E-05 | 8,59E-04 | NM_175518   | NM_175518   | NM_175518   | Mm.296632 | 242474    | ENSMUST0000069099 |                   |
| A_52_P518270   | <i>Tmem255a</i> | transmembrane protein 255A                                       | 1,06 | 2,09 | 2,76E-06 | 1,70E-04 | NM_172930   | NM_172930   | NM_172930   | Mm.72979  | 245386    | ENSMUST0000069101 |                   |
| A_52_P263201   | <i>Tmem33</i>   | transmembrane protein 33                                         | 0,88 | 1,84 | 1,46E-05 | 4,59E-04 | NM_030108   | NM_030108   | NM_030108   | Mm.23217  | 67878     | ENSMUST0000069102 |                   |
| A_51_P407606   | <i>Tmem48</i>   | transmembrane protein 48                                         | 0,89 | 1,85 | 3,89E-05 | 8,16E-04 | NM_028355   | NM_028355   | NM_028355   | Mm.28478  | 72787     | ENSMUST0000069103 |                   |
| A_51_P265545   | <i>Tmem57</i>   | transmembrane protein 57                                         | 0,58 | 1,49 | 1,04E-04 | 1,55E-03 | NM_025382   | NM_025382   | NM_025382   | Mm.99793  | 66146     | ENSMUST0000069104 |                   |
| A_55_P2045268  | <i>Tmem59</i>   | transmembrane protein 59                                         | 0,92 | 1,89 | 6,50E-05 | 1,14E-03 | NM_029565   | NM_029565   | NM_029565   | Mm.291192 | 56374     | ENSMUST0000069105 |                   |
| A_51_P204387   | <i>Tmem63c</i>  | transmembrane protein 63c                                        | 0,92 | 1,89 | 2,00E-05 | 5,51E-04 | NM_172583   | NM_172583   | NM_172583   | Mm.110033 | 217733    | ENSMUST0000069106 |                   |
| A_51_P484753   | <i>Tmem66</i>   | transmembrane protein 66                                         | 0,66 | 1,58 | 4,55E-05 | 1,02E-03 | NM_026432   | NM_026432   | NM_026432   | Mm.29353  | 67887     | ENSMUST0000069107 |                   |
| A_55_P1970474  | <i>Tmem67</i>   | transmembrane protein 67                                         | 0,87 | 1,82 | 7,94E-05 | 1,29E-03 | NM_177861   | NM_177861   | NM_177861   | Mm.475125 | 329795    | ENSMUST0000069108 |                   |
| A_55_P1969850  | <i>Tmem68</i>   | transmembrane protein 68                                         | 1,18 | 2,26 | 1,85E-05 | 5,27E-04 | NM_028097   | NM_028097   | NM_028097   | Mm.490391 | 72098     | ENSMUST0000069109 |                   |
| A_55_P2216996  | <i>Tmem87a</i>  | transmembrane protein 87A                                        | 1,28 | 2,43 | 8,14E-08 | 3,00E-05 | NM_0011049  | NM_0011049  | NM_0011049  | Mm.260712 | 211499    | ENSMUST0000069110 |                   |
| A_51_P212473   | <i>Tmtc3</i>    | transmembrane and tetraicopeptide repeat containing 3            | 1,34 | 2,54 | 5,17E-07 | 7,41E-05 | NM_00103333 | NM_00103333 | NM_00103333 | Mm.296805 | 237500    | ENSMUST0000069111 |                   |
| A_55_P2023777  | <i>Tmx2</i>     | thioredoxin-related transmembrane protein 2                      | 0,68 | 1,60 | 7,28E-05 | 1,23E-03 | NM_025868   | NM_025868   | NM_025868   | Mm.371621 | 66958     | ENSMUST0000069112 |                   |
| A_51_P319379   | <i>Tmx4</i>     | thioredoxin-related transmembrane protein 4                      | 1,26 | 2,40 | 2,04E-05 | 5,56E-04 | NM_029148   | NM_029148   | NM_029148   | Mm.264096 | 52837     | ENSMUST0000069113 |                   |
| A_52_P355169   | <i>Tnc</i>      | tenascin C                                                       | 2,48 | 5,59 | 2,84E-08 | 1,75E-05 | NM_011607   | NM_011607   | NM_011607   | Mm.454219 | 21923     | ENSMUST0000069114 |                   |
| A_51_P385099   | <i>Tnf</i>      | tumor necrosis factor                                            | 0,80 | 1,74 | 3,36E-05 | 7,45E-04 | NM_013693   | NM_013693   | NM_013693   | Mm.1293   | 21926     | ENSMUST0000069116 |                   |
| A_52_P663757   | <i>Tnik</i>     | TRAF2 and NCK interacting kinase                                 | 1,10 | 2,14 | 4,53E-06 | 2,28E-04 | NM_026910   | NM_026910   | NM_026910   | Mm.126193 | 66153     | ENSMUST0000069119 |                   |
| A_52_P127024   | <i>Tnks</i>     | tankyrase, TRF-1-interacting ankyrin-related ADP-ribosyl polymer | 1,30 | 2,47 | 1,13E-05 | 3,93E-04 | NM_175091   | NM_175091   | NM_175091   | Mm.88364  | 21951     | ENSMUST0000069120 |                   |
| A_51_P221362   | <i>Tnks2</i>    | tankyrase, TRF-1-interacting ankyrin-related ADP-ribosyl polymer | 0,57 | 1,49 | 6,27E-05 | 1,11E-03 | NM_00116363 | NM_00116363 | NM_00116363 | Mm.249310 | 74493     | ENSMUST0000069122 |                   |
| A_52_P420308   | <i>Tnpo1</i>    | transportin 1                                                    | 0,73 | 1,66 | 8,32E-05 | 1,34E-03 | ENSMUST0000 |             |             | BC058670  | Mm.173286 | 238799            | ENSMUST0000069123 |
| A_52_P480544   | <i>Tnpo2</i>    | transportin 2 (importin 3, karyopherin beta 2b)                  | 0,89 | 1,85 | 8,71E-06 | 3,40E-04 | NM_145390   | NM_145390   | NM_145390   | Mm.220357 | 212999    | ENSMUST0000069124 |                   |
| A_55_P1974957  | <i>Tnr</i>      | tenascin R                                                       | 1,24 | 2,35 | 1,64E-07 | 4,37E-05 | NM_022312   | NM_022312   | NM_022312   | Mm.44701  | 21960     | ENSMUST0000069125 |                   |
| A_55_P2030578  | <i>Tns1</i>     | tensin 1                                                         | 0,70 | 1,62 | 1,47E-04 | 1,95E-03 | NM_027884   | NM_027884   | NM_027884   | Mm.309975 | 21961     | ENSMUST0000069126 |                   |
| A_52_P403443   | <i>Tns3</i>     | tensin 3                                                         | 1,29 | 2,44 | 1,98E-06 | 1,41E-04 | NM_00108358 | NM_00108358 | NM_00108358 | Mm.337820 | 319939    | ENSMUST0000069127 |                   |
| A_55_P1989296  | <i>Tnxb</i>     | tenascin XB                                                      | 1,77 | 3,42 | 7,35E-08 | 2,84E-05 | NM_031176   | NM_031176   | NM_031176   | Mm.290527 | 81877     | ENSMUST0000069128 |                   |
| A_55_P2133047  | <i>Tollip</i>   | toll interacting protein                                         | 1,14 | 2,20 | 4,86E-06 | 2,38E-04 | NM_023764   | NM_023764   | NM_023764   | Mm.103551 | 54473     | ENSMUST0000069129 |                   |

|               |                  |                                                            |      |      |          |          |             |             |             |           |        |                   |
|---------------|------------------|------------------------------------------------------------|------|------|----------|----------|-------------|-------------|-------------|-----------|--------|-------------------|
| A_52_P244496  | <b>U2surp</b>    | U2 snRNP-associated SURP domain containing                 | 0.88 | 1.84 | 1.49E-05 | 4.62E-04 | NM_00111497 | NM_00111497 | NM_00111497 | Mm.292742 | 67958  | ENSMUST0000069186 |
| A_55_P1971966 | <b>Uba1</b>      | ubiquitin-like modifier activating enzyme 1                | 1.24 | 2.36 | 6.28E-07 | 8.24E-05 | NM_00113608 | NM_00113608 | NM_00113608 | Mm.1104   | 22201  | ENSMUST0000069187 |
| A_55_P2136020 | <b>Uba2</b>      | ubiquitin-like modifier activating enzyme 2                | 0.67 | 1.59 | 4.35E-05 | 8.81E-04 | NM_016682   | NM_016682   | NM_016682   | Mm.27560  | 50995  | ENSMUST0000069188 |
| A_52_P671062  | <b>Uba6</b>      | ubiquitin-like modifier activating enzyme 6                | 1.32 | 2.49 | 7.05E-07 | 6.83E-05 | NM_127212   | NM_127212   | NM_127212   | Mm.486425 | 213380 | ENSMUST0000069189 |
| A_55_P1996941 | <b>Uba2c</b>     | ubiquitin-conjugating enzyme E2C                           | 1.13 | 2.19 | 1.05E-06 | 1.02E-04 | NM_026785   | NM_026785   | NM_026785   | Mm.89830  | 68612  | ENSMUST0000069190 |
| A_51_P499061  | <b>Ube2o</b>     | ubiquitin-conjugating enzyme E2O                           | 1.31 | 2.48 | 2.22E-06 | 1.50E-04 | NM_173755   | NM_173755   | NM_173755   | Mm.243950 | 61242  | ENSMUST0000069191 |
| A_55_P2077994 | <b>Ube2v2</b>    | ubiquitin-conjugating enzyme E2 variant 2                  | 0.95 | 1.93 | 3.66E-06 | 2.03E-04 | NM_023585   | NM_023585   | NM_023585   | Mm.235407 | 70620  | ENSMUST0000069192 |
| A_55_P2158627 | <b>Ube4a</b>     | ubiquitination factor E4A, UFD2 homolog (S. cerevisiae)    | 0.78 | 1.72 | 4.59E-05 | 9.14E-04 | ENSMUST0000 | BC006649    | BC006649    | Mm.215069 | 140630 | ENSMUST0000069193 |
| A_55_P2074908 | <b>Ube4b</b>     | ubiquitination factor E4B, UFD2 homolog (S. cerevisiae)    | 0.71 | 1.63 | 4.22E-05 | 8.62E-04 | NM_022022   | NM_022022   | NM_022022   | Mm.393991 | 63958  | ENSMUST0000069194 |
| A_51_P107938  | <b>Ubr1</b>      | ubiquitin protein ligase E3 component n-recognin 1         | 1.31 | 2.48 | 1.35E-05 | 4.35E-04 | NM_009461   | NM_009461   | NM_009461   | Mm.89830  | 22222  | ENSMUST0000069195 |
| A_55_P2008576 | <b>Ubr2</b>      | ubiquitin protein ligase E3 component n-recognin 2         | 1.34 | 2.54 | 4.65E-07 | 7.10E-05 | NM_00117737 | NM_00117737 | NM_00117737 | Mm.28234  | 224826 | ENSMUST0000069196 |
| A_52_P160418  | <b>Ubr3</b>      | ubiquitin protein ligase E3 component n-recognin 3         | 1.62 | 3.08 | 1.83E-07 | 4.50E-05 | NM_177783   | NM_177783   | NM_177783   | Mm.134576 | 68795  | ENSMUST0000069197 |
| A_52_P647607  | <b>Ubr4</b>      | ubiquitin protein ligase E3 component n-recognin 4         | 2.47 | 5.53 | 9.04E-09 | 1.03E-05 | NM_00116031 | NM_00116031 | NM_00116031 | Mm.271956 | 69116  | ENSMUST0000069200 |
| A_55_P1980651 | <b>Ubr5</b>      | ubiquitin protein ligase E3 component n-recognin 5         | 1.20 | 2.29 | 3.96E-06 | 2.12E-04 | NM_00108135 | NM_00108135 | NM_00108135 | Mm.476840 | 70790  | ENSMUST0000069202 |
| A_52_P24308   | <b>Uchl1</b>     | ubiquitin carboxy-terminal hydrolase L1                    | 0.73 | 1.65 | 6.07E-05 | 1.09E-03 | NM_011670   | NM_011670   | NM_011670   | Mm.29807  | 22223  | ENSMUST0000069203 |
| A_51_P446417  | <b>Ufl1</b>      | UFM1-specific ligase 1                                     | 1.13 | 2.19 | 2.15E-06 | 1.47E-04 | NM_026194   | NM_026194   | NM_026194   | Mm.226295 | 67400  | ENSMUST0000069204 |
| A_55_P2016089 | <b>Uggt1</b>     | UDP-glucosyltransferase glucosyltransferase 1              | 0.55 | 1.46 | 1.44E-04 | 1.93E-03 | NM_198899   | NM_198899   | NM_198899   | Mm.261022 | 320911 | ENSMUST0000069205 |
| A_52_P439263  | <b>Ugt8a</b>     | UDP galactosyltransferase 8A                               | 0.99 | 1.99 | 6.57E-05 | 1.15E-03 | NM_011674   | NM_011674   | NM_011674   | Mm.306021 | 22239  | ENSMUST0000069206 |
| A_66_P120074  | <b>Uhrf1</b>     | ubiquitin-like, containing PHD and RING finger domains, 1  | 1.07 | 2.10 | 5.19E-05 | 9.87E-04 | NM_00111107 | NM_00111107 | NM_00111107 | Mm.42196  | 18140  | ENSMUST0000069207 |
| A_55_P1983070 | <b>Uhrf1b1p1</b> | UHRF1 (ICBP90) binding protein 1                           | 0.73 | 1.66 | 8.48E-05 | 1.35E-03 | NM_00108076 | NM_00108076 | NM_00108076 | Mm.291291 | 224648 | ENSMUST0000069208 |
| A_51_P141772  | <b>Uhrf2</b>     | ubiquitin-like, containing PHD and RING finger domains 2   | 1.74 | 1.67 | 7.90E-06 | 3.20E-04 | NM_144873   | NM_144873   | NM_144873   | Mm.313364 | 109113 | ENSMUST0000069209 |
| A_55_P2427900 | <b>Unc13c</b>    | unc-13 homolog C (C. elegans)                              | 1.40 | 2.65 | 4.06E-07 | 6.72E-05 | NM_00108115 | NM_00108115 | NM_00108115 | Mm.41035  | 208898 | ENSMUST0000069210 |
| A_55_P2026794 | <b>Unc50</b>     | unc-50 homolog (C. elegans)                                | 0.99 | 1.99 | 8.62E-06 | 3.38E-04 | NM_026123   | NM_026123   | NM_026123   | Mm.274040 | 67387  | ENSMUST0000069211 |
| A_52_P380301  | <b>Unc5c</b>     | unc-5 homolog C (C. elegans)                               | 1.19 | 2.28 | 1.01E-06 | 1.01E-04 | NM_009472   | NM_009472   | NM_009472   | Mm.24430  | 22253  | ENSMUST0000069212 |
| A_55_P2073313 | <b>Unc79</b>     | unc-79 homolog C (C. elegans)                              | 0.65 | 1.57 | 4.92E-05 | 9.56E-04 | NM_00108101 | NM_00108101 | NM_00108101 | Mm.387073 | 127843 | ENSMUST0000069213 |
| A_55_P2003586 | <b>Umk1</b>      | unkeft-like (Drosophila)                                   | 0.57 | 1.48 | 6.57E-05 | 1.15E-03 | NM_00119702 | NM_00119702 | NM_00119702 | Mm.267353 | 74154  | ENSMUST0000069214 |
| A_51_P183051  | <b>Upb1</b>      | ureidopropionase, beta                                     | 1.64 | 3.12 | 2.16E-06 | 1.47E-04 | NM_133995   | NM_133995   | NM_133995   | Mm.441195 | 103149 | ENSMUST0000069215 |
| A_51_P128648  | <b>Uqcrc2</b>    | ubiquinol cytochrome c reductase core protein 2            | 0.87 | 1.83 | 9.86E-05 | 1.50E-03 | NM_025899   | NM_025899   | NM_025899   | Mm.334206 | 67003  | ENSMUST0000069216 |
| A_52_P484118  | <b>Urb2</b>      | URB2 ribosome biogenesis 2 homolog (S. cerevisiae)         | 0.83 | 1.77 | 4.44E-05 | 8.93E-04 | NM_00102987 | NM_00102987 | NM_00102987 | Mm.334891 | 382038 | ENSMUST0000069217 |
| A_55_P2060722 | <b>Usa1</b>      | USO1 vesicle docking factor                                | 0.96 | 1.95 | 3.85E-05 | 8.12E-04 | NM_019490   | NM_019490   | NM_019490   | Mm.15868  | 56041  | ENSMUST0000069218 |
| A_51_P315673  | <b>Usp11</b>     | ubiquitin specific peptidase 11                            | 1.07 | 2.10 | 1.35E-05 | 4.37E-04 | NM_145628   | NM_145628   | NM_145628   | Mm.34489  | 236733 | ENSMUST0000069219 |
| A_51_P104077  | <b>Usp13</b>     | ubiquitin specific peptidase 13 (isopeptidase T-3)         | 0.57 | 1.48 | 3.68E-05 | 7.85E-04 | NM_00101302 | NM_00101302 | NM_00101302 | Mm.316153 | 72607  | ENSMUST0000069220 |
| A_65_P11632   | <b>Usp14</b>     | ubiquitin specific peptidase 14                            | 0.97 | 1.96 | 5.54E-05 | 1.03E-03 | NM_021522   | NM_021522   | NM_021522   | Mm.329277 | 59025  | ENSMUST0000069221 |
| A_55_P2099785 | <b>Usp15</b>     | ubiquitin specific peptidase 15                            | 0.88 | 1.84 | 1.09E-04 | 1.60E-03 | NM_027604   | NM_027604   | NM_027604   | Mm.244209 | 14429  | ENSMUST0000069222 |
| A_66_P138769  | <b>Usp19</b>     | ubiquitin specific peptidase 19                            | 1.53 | 2.89 | 3.02E-07 | 5.92E-05 | NM_00116837 | NM_00116837 | NM_00116837 | Mm.289706 | 71472  | ENSMUST0000069223 |
| A_55_P1974238 | <b>Usp20</b>     | ubiquitin specific peptidase 20                            | 0.95 | 1.93 | 1.57E-05 | 4.78E-04 | NM_028846   | NM_028846   | NM_028846   | Mm.346654 | 74720  | ENSMUST0000069225 |
| A_55_P2440032 | <b>Usp24</b>     | ubiquitin specific peptidase 24                            | 1.65 | 3.13 | 4.40E-07 | 6.97E-05 | NM_183225   | NM_183225   | NM_183225   | Mm.234544 | 329908 | ENSMUST0000069227 |
| A_51_P257982  | <b>Usp29</b>     | ubiquitin specific peptidase 29                            | 0.74 | 1.67 | 1.40E-04 | 1.89E-03 | NM_001323   | NM_001323   | NM_001323   | Mm.40752  | 57575  | ENSMUST0000069229 |
| A_52_P452019  | <b>Usp31</b>     | ubiquitin specific peptidase 31                            | 0.64 | 1.56 | 1.15E-04 | 1.66E-03 | NM_00103317 | NM_00103317 | NM_00103317 | Mm.122538 | 76179  | ENSMUST0000069230 |
| A_55_P2179335 | <b>Usp33</b>     | ubiquitin specific peptidase 33                            | 1.36 | 2.57 | 1.10E-06 | 1.05E-04 | NM_133247   | NM_133247   | NM_133247   | Mm.258320 | 170822 | ENSMUST0000069231 |
| A_52_P58059   | <b>Usp34</b>     | ubiquitin specific peptidase 34                            | 1.73 | 3.31 | 1.41E-06 | 1.18E-04 | NM_00119040 | NM_00119040 | NM_00119040 | Mm.119155 | 17847  | ENSMUST0000069232 |
| A_65_P202321  | <b>Usp36</b>     | ubiquitin specific peptidase 36                            | 0.82 | 1.77 | 7.75E-05 | 1.27E-03 | NM_00103352 | NM_00103352 | NM_00103352 | Mm.90233  | 72344  | ENSMUST0000069233 |
| A_51_P131216  | <b>Usp54</b>     | ubiquitin specific peptidase 54                            | 0.85 | 1.80 | 9.65E-06 | 3.61E-04 | NM_030180   | NM_030180   | NM_030180   | Mm.301173 | 78787  | ENSMUST0000069234 |
| A_52_P622391  | <b>Usp9x</b>     | ubiquitin specific peptidase 9, X chromosome               | 1.77 | 3.40 | 1.13E-07 | 3.70E-05 | NM_009481   | NM_009481   | NM_009481   | Mm.242646 | 22284  | ENSMUST0000069235 |
| A_51_P347467  | <b>Utp14a</b>    | UTP14, US small nuclear ribonucleoprotein, homolog A (yea) | 0.81 | 1.75 | 4.49E-05 | 8.99E-04 | NM_028276   | NM_028276   | NM_028276   | Mm.336045 | 72554  | ENSMUST0000069236 |
| A_55_P2122027 | <b>Utrn</b>      | utrophin                                                   | 1.19 | 2.28 | 3.92E-04 | 1.16E-02 | NM_011682   | NM_011682   | NM_011682   | Mm.331784 | 22288  | ENSMUST0000069237 |
| A_51_P203501  | <b>Vars</b>      | valyl-tRNA synthetase                                      | 1.03 | 2.04 | 1.90E-06 | 1.37E-04 | NM_011690   | NM_011690   | NM_011690   | Mm.28420  | 23221  | ENSMUST0000069238 |
| A_51_P210956  | <b>Vcam1</b>     | vascular cell adhesion molecule 1                          | 1.48 | 2.80 | 1.29E-05 | 4.25E-04 | NM_011693   | NM_011693   | NM_011693   | Mm.76649  | 22329  | ENSMUST0000069239 |
| A_55_P1960208 | <b>Vcan</b>      | versican                                                   | 1.58 | 2.98 | 2.70E-05 | 6.56E-04 | NM_172955   | NM_172955   | NM_172955   | Mm.158700 | 13003  | ENSMUST0000069241 |
| A_66_P133244  | <b>Vcl</b>       | vinculin                                                   | 1.56 | 2.95 | 3.00E-07 | 5.90E-05 | NM_009502   | NM_009502   | NM_009502   | Mm.279361 | 22330  | ENSMUST0000069243 |
| A_52_P638895  | <b>Vegfa</b>     | vascular endothelial growth factor A                       | 0.71 | 1.64 | 9.15E-05 | 1.43E-03 | NM_00102525 | NM_00102525 | NM_00102525 | Mm.282184 | 22339  | ENSMUST0000069245 |
| A_52_P96552   | <b>Vkorc11f</b>  | vitamin K epoxide reductase complex, subunit 1-like 1      | 0.81 | 1.76 | 8.88E-05 | 1.40E-03 | NM_002712   | NM_002712   | NM_002712   | Mm.281178 | 69568  | ENSMUST0000069246 |
| A_55_P2026790 | <b>Vprbp</b>     | Vpr (HIV-1) binding protein                                | 1.00 | 2.00 | 5.56E-05 | 1.03E-03 | NM_00101550 | NM_00101550 | NM_00101550 | Mm.489783 | 321006 | ENSMUST0000069247 |
| A_51_P356822  | <b>Vps13c</b>    | vacuolar protein sorting 13C                               | 1.20 | 2.30 | 1.82E-07 | 4.50E-05 | AK048766    | AK048766    | AK048766    | Mm.241454 | 320528 | ENSMUST0000069249 |
| A_51_P175974  | <b>Vps13d</b>    | vacuolar protein sorting 13D                               | 1.28 | 2.42 | 3.19E-07 | 6.03E-05 | ENSMUST0000 | AK134463    | AK134463    | Mm.476866 | 230895 | ENSMUST0000069250 |
| A_51_P109840  | <b>Vtn</b>       | vitronectin                                                | 1.21 | 2.32 | 1.83E-06 | 1.35E-04 | NM_011707   | NM_011707   | NM_011707   | Mm.3667   | 22370  | ENSMUST0000069251 |
| A_55_P218012  | <b>Vwa8</b>      | von Willebrand factor A domain containing 8                | 1.26 | 2.40 | 1.85E-06 | 1.36E-04 | NM_173758   | NM_173758   | NM_173758   | Mm.159651 | 219189 | ENSMUST0000069261 |
| A_52_P597860  | <b>Wasf2</b>     | WAS protein family, member 2                               | 0.89 | 1.86 | 1.25E-06 | 1.11E-04 | NM_153423   | NM_153423   | NM_153423   | Mm.23666  | 242887 | ENSMUST0000069263 |
| A_52_P96782   | <b>Wasl</b>      | Wiskott-Aldrich syndrome-like (human)                      | 0.75 | 1.68 | 6.93E-06 | 2.96E-04 | NM_028459   | NM_028459   | NM_028459   | Mm.1574   | 73178  | ENSMUST0000069264 |
| A_55_P1977330 | <b>Wbp11</b>     | WW domain binding protein 11                               | 1.00 | 1.87 | 1.04E-05 | 3.77E-04 | NM_021714   | NM_021714   | NM_021714   | Mm.141197 | 60321  | ENSMUST0000069265 |
| A_55_P1978875 | <b>Wbp7</b>      | WW domain binding protein 7                                | 1.24 | 2.36 | 4.14E-07 | 6.75E-05 | NM_029274   | NM_029274   | NM_029274   | Mm.168688 | 75410  | ENSMUST0000069266 |
| A_55_P2457360 | <b>Wdfy3</b>     | WD repeat and FYVE domain containing 3                     | 1.68 | 3.20 | 2.02E-07 | 4.69E-05 | NM_172882   | NM_172882   | NM_172882   | Mm.335252 | 72145  | ENSMUST0000069267 |
| A_52_P409675  | <b>Wdr11</b>     | WD repeat domain 11                                        | 0.81 | 1.76 | 7.52E-06 | 3.10E-04 | NM_172255   | NM_172255   | NM_172255   | Mm.229323 | 20245  | ENSMUST0000069269 |
| A_51_P112445  | <b>Wdr3</b>      | WD repeat domain 3                                         | 1.82 | 3.23 | 4.05E-06 | 2.15E-04 | NM_175552   | NM_175552   | NM_175552   | Mm.24591  | 269470 | ENSMUST0000069270 |
| A_52_P218002  | <b>Wdr36</b>     | WD repeat domain 36                                        | 1.23 | 2.34 | 1.43E-06 | 1.19E-04 | NM_144863   | NM_144863   | NM_144863   | Mm.38816  | 225348 | ENSMUST0000069273 |
| A_52_P434052  | <b>Wdr37</b>     | WD repeat domain 37                                        | 1.06 | 2.09 | 2        |          |             |             |             |           |        |                   |

|               |                  |                                            |      |      |          |          |             |             |             |           |           |                   |
|---------------|------------------|--------------------------------------------|------|------|----------|----------|-------------|-------------|-------------|-----------|-----------|-------------------|
| A_55_P2029136 | <b>Zfp287</b>    | zinc finger protein 287                    | 0.77 | 1.71 | 7.23E-06 | 3.04E-04 | NM_133208   | NM_133208   | NM_133208   | Mm.339982 | 170740    | ENSMUST0000069343 |
| A_51_P275591  | <b>Zfp292</b>    | zinc finger protein 292                    | 0.89 | 1.85 | 1.62E-05 | 4.85E-04 | NM_013889   | NM_013889   | NM_013889   | Mm.38193  | 30046     | ENSMUST0000069344 |
| A_52_P509185  | <b>Zfp318</b>    | zinc finger protein 318                    | 1.95 | 3.87 | 2.44E-08 | 1.69E-05 | NM_207671   | NM_207671   | NM_207671   | Mm.439916 | 57908     | ENSMUST0000069345 |
| A_52_P312371  | <b>Zfp345</b>    | zinc finger protein 345                    | 0.67 | 1.59 | 5.47E-05 | 1.02E-03 | NM_0010349C | NM_0010349C | NM_0010349C | Mm.451002 | 545471    | ENSMUST0000069347 |
| A_51_P273705  | <b>Zfp354c</b>   | zinc finger protein 354C                   | 1.02 | 2.03 | 1.67E-06 | 1.29E-04 | NM_13922    | NM_13922    | NM_13922    | Mm.103674 | 30944     | ENSMUST0000069348 |
| A_52_P61703   | <b>Zfp369</b>    | zinc finger protein 369                    | 1.08 | 2.12 | 5.02E-05 | 9.67E-04 | NM_178364   | NM_178364   | NM_178364   | Mm.151546 | 170936    | ENSMUST0000069349 |
| A_55_P2153941 | <b>Zfp386</b>    | zinc finger protein 386 (Kruppel-like)     | 0.95 | 1.93 | 7.04E-06 | 2.99E-04 | NM_0010406E | NM_0010406E | NM_0010406E | Mm.254997 | 56220     | ENSMUST0000069351 |
| A_51_P372895  | <b>Zfp433</b>    | RIKEN cDNA 1700123A16 gene                 | 0.78 | 1.72 | 3.70E-05 | 7.91E-04 | NM_0012430E | NM_0012430E | NM_0012430E | Mm.490466 | 73610     | ENSMUST0000069353 |
| A_51_P446583  | <b>Zfp445</b>    | zinc finger protein 445                    | 0.87 | 1.83 | 1.48E-05 | 4.60E-04 | NM_173364   | NM_173364   | NM_173364   | Mm.326477 | 235682    | ENSMUST0000069354 |
| A_55_P2059085 | <b>Zfp457</b>    | zinc finger protein 457                    | 1.10 | 2.14 | 9.16E-06 | 3.50E-04 | NM_0010036E | NM_0010036E | NM_0010036E | Mm.439456 | 431706    | ENSMUST0000069355 |
| A_51_P357207  | <b>Zfp518b</b>   | zinc finger protein 518B                   | 0.88 | 1.84 | 8.56E-05 | 1.36E-03 | NM_00108114 | NM_00108114 | NM_00108114 | Mm.38277  | 100515    | ENSMUST0000069356 |
| A_55_P2159665 | <b>Zfp534</b>    | zinc finger protein 534                    | 0.85 | 1.80 | 7.05E-05 | 1.20E-03 | NM_00112718 | NM_00112718 | NM_00112718 | Mm.327194 | 100503584 | ENSMUST0000069357 |
| A_51_P218953  | <b>Zfp536</b>    | zinc finger protein 536                    | 0.98 | 1.98 | 9.45E-07 | 9.79E-05 | NM_172385   | NM_172385   | NM_172385   | Mm.376309 | 243937    | ENSMUST0000069358 |
| A_55_P1976529 | <b>Zfp551</b>    | zinc finger protein 551                    | 1.25 | 2.38 | 2.44E-06 | 1.68E-04 | NM_00103382 | NM_00103382 | NM_00103382 | Mm.361832 | 619331    | ENSMUST0000069360 |
| A_55_P2000903 | <b>Zfp558</b>    | zinc finger protein 558                    | 1.27 | 2.41 | 8.64E-06 | 3.38E-04 | NM_00100757 | NM_00100757 | NM_00100757 | Mm.478914 | 238693    | ENSMUST0000069362 |
| A_52_P400857  | <b>Zfp595</b>    | zinc finger protein 595                    | 1.28 | 2.43 | 4.47E-06 | 2.27E-04 | NM_177622   | NM_177622   | NM_177622   | Mm.289695 | 218314    | ENSMUST0000069363 |
| A_55_P2130032 | <b>Zfp599</b>    | zinc finger protein 599                    | 0.85 | 1.81 | 1.49E-05 | 4.62E-04 | NM_181419   | NM_181419   | NM_181419   | Mm.292381 | 235048    | ENSMUST0000069364 |
| A_66_P124732  | <b>Zfp606</b>    | zinc finger protein 606                    | 0.66 | 1.58 | 7.14E-05 | 1.21E-03 | NM_026112   | NM_026112   | NM_026112   | Mm.98929  | 67370     | ENSMUST0000069365 |
| A_55_P2173373 | <b>Zfp622</b>    | zinc finger protein 622                    | 0.74 | 1.67 | 3.83E-06 | 2.08E-04 | NM_00102484 | NM_00102484 | NM_00102484 | Mm.16650  | 22720     | ENSMUST0000069366 |
| A_55_P2083997 | <b>Zfp664</b>    | zinc finger protein 664                    | 0.66 | 1.58 | 5.70E-05 | 1.05E-03 | NM_00108175 | NM_00108175 | NM_00108175 | Mm.138617 | 269704    | ENSMUST0000069367 |
| A_55_P1982234 | <b>Zfp708</b>    | zinc finger protein 708                    | 0.86 | 1.81 | 7.29E-05 | 1.23E-03 | NM_00101232 | NM_00101232 | NM_00101232 | Mm.458849 | 432769    | ENSMUST0000069368 |
| A_51_P472621  | <b>Zfp719</b>    | zinc finger protein 719                    | 0.77 | 1.71 | 2.06E-05 | 5.61E-04 | NM_172482   | NM_172482   | NM_172482   | Mm.234422 | 210105    | ENSMUST0000069369 |
| A_51_P366227  | <b>Zfp799</b>    | zinc finger protein 799                    | 0.97 | 1.96 | 4.01E-05 | 8.35E-04 | NM_177359   | NM_177359   | NM_177359   | Mm.476307 | 240064    | ENSMUST0000069370 |
| A_55_P2046478 | <b>Zfp81</b>     | zinc finger protein 81                     | 0.88 | 1.84 | 4.10E-05 | 8.45E-04 | NM_207541   | NM_207541   | NM_207541   | Mm.170029 | 224694    | ENSMUST0000069371 |
| A_55_P1967301 | <b>Zfp85-rs1</b> | zinc finger protein 85, related sequence 1 | 1.16 | 2.23 | 2.69E-06 | 1.67E-04 | NM_00100113 | NM_00100113 | NM_00100113 | Mm.288396 | 22746     | ENSMUST0000069373 |
| A_51_P366290  | <b>Zfp865</b>    | zinc finger protein 865                    | 0.77 | 1.70 | 1.22E-04 | 1.72E-03 | NM_0010333E | NM_0010333E | NM_0010333E | Mm.86607  | 319748    | ENSMUST0000069374 |
| A_52_P493322  | <b>Zfp866</b>    | zinc finger protein 866                    | 0.66 | 1.58 | 6.77E-05 | 1.17E-03 | NM_177899   | NM_177899   | NM_177899   | Mm.41364  | 330788    | ENSMUST0000069375 |
| A_51_P341664  | <b>Zfp87</b>     | zinc finger protein 87                     | 1.05 | 2.07 | 1.07E-05 | 3.81E-04 | NM_133228   | NM_133228   | NM_133228   | Mm.138283 | 117063    | ENSMUST0000069376 |
| A_55_P1959076 | <b>Zfp930</b>    | zinc finger protein 930                    | 0.74 | 1.67 | 2.67E-05 | 6.53E-04 | NM_00101337 | NM_00101337 | NM_00101337 | Mm.334577 | 234358    | ENSMUST0000069377 |
| A_55_P2117130 | <b>Zfp937</b>    | zinc finger protein 937                    | 1.06 | 2.09 | 2.42E-06 | 1.58E-04 | NM_00114241 | NM_00114241 | NM_00114241 | Mm.278428 | 245174    | ENSMUST0000069378 |
| A_52_P239023  | <b>Zfp955b</b>   | zinc finger protein 955B                   | 1.32 | 2.50 | 1.77E-06 | 1.32E-04 | NM_00114295 | NM_00114295 | NM_00114295 | Mm.276296 | 100043468 | ENSMUST0000069379 |
| A_51_P336509  | <b>Zfpm2</b>     | zinc finger protein, multitype 2           | 0.76 | 1.69 | 2.62E-05 | 6.45E-04 | NM_011766   | NM_011766   | NM_011766   | Mm.39496  | 22762     | ENSMUST0000069380 |
| A_51_P312149  | <b>Zfr</b>       | zinc finger RNA binding protein            | 0.70 | 1.62 | 1.30E-04 | 1.80E-03 | NM_011767   | NM_011767   | NM_011767   | Mm.273496 | 22763     | ENSMUST0000069381 |
| A_52_P566390  | <b>Zfyve26</b>   | zinc finger, FYVE domain containing 26     | 0.62 | 1.53 | 7.49E-05 | 1.24E-03 | NM_00100855 | NM_00100855 | NM_00100855 | Mm.297919 | 211978    | ENSMUST0000069382 |
| A_55_P1980416 | <b>Zkscan1</b>   | zinc finger with KRAB and SCAN domains 1   | 0.92 | 1.89 | 2.70E-05 | 6.57E-04 | NM_133906   | NM_133906   | NM_133906   | Mm.213114 | 74570     | ENSMUST0000069383 |
| A_55_P2059502 | <b>Zkscan16</b>  | zinc finger with KRAB and SCAN domains 16  | 1.03 | 2.04 | 1.15E-05 | 3.96E-04 | NM_00109932 | NM_00109932 | NM_00109932 | Mm.484169 | 100041581 | ENSMUST0000069384 |
| A_55_P2113071 | <b>Zkscan5</b>   | zinc finger with KRAB and SCAN domains 5   | 0.53 | 1.45 | 1.21E-04 | 1.72E-03 | NM_016683   | NM_016683   | NM_016683   | Mm.332842 | 22757     | ENSMUST0000069385 |
| A_55_P2034270 | <b>Zkscan7</b>   | zinc finger with KRAB and SCAN domains 7   | 0.73 | 1.66 | 1.18E-05 | 4.00E-04 | NM_00117750 | NM_00117750 | NM_00117750 | Mm.483265 | 382118    | ENSMUST0000069386 |
| A_52_P28582   | <b>Zmym2</b>     | zinc finger, MYM-type 2                    | 0.98 | 1.97 | 1.24E-05 | 4.12E-04 | NM_029498   | NM_029498   | NM_029498   | Mm.31417  | 76007     | ENSMUST0000069387 |
| A_55_P2122688 | <b>Zmym3</b>     | zinc finger, MYM-type 3                    | 1.13 | 2.20 | 1.22E-06 | 1.10E-04 | NM_019831   | NM_019831   | NM_019831   | Mm.23458  | 56364     | ENSMUST0000069388 |
| A_55_P2021991 | <b>Zmym4</b>     | zinc finger, MYM-type 4                    | 0.82 | 1.77 | 2.94E-05 | 6.90E-04 | NM_00111439 | NM_00111439 | NM_00111439 | Mm.165401 | 67785     | ENSMUST0000069389 |
| A_55_P2076757 | <b>Znfx1</b>     | zinc finger, NFX1-type containing 1        | 1.35 | 2.55 | 1.67E-07 | 4.37E-05 | NM_00103315 | NM_00103315 | NM_00103315 | Mm.297074 | 98999     | ENSMUST0000069390 |
| A_52_P513345  | <b>Zswim5</b>    | zinc finger SWIM-type containing 5         | 0.93 | 1.91 | 1.23E-05 | 4.11E-04 | NM_00102991 | NM_00102991 | NM_00102991 | Mm.218946 | 74464     | ENSMUST0000069391 |
| A_51_P215995  | <b>Zswim6</b>    | zinc finger SWIM-type containing 6         | 0.53 | 1.45 | 9.90E-05 | 1.51E-03 | NM_145456   | NM_145456   | NM_145456   | Mm.490418 | 67263     | ENSMUST0000069392 |
| A_55_P2039180 | <b>Zswim8</b>    | zinc finger SWIM-type containing 8         | 0.92 | 1.89 | 1.22E-05 | 4.10E-04 | NM_027996   | NM_027996   | NM_027996   | Mm.275082 | 268271    | ENSMUST0000069393 |
| A_55_P2172430 | <b>Zxdb</b>      | zinc finger, X-linked, duplicated B        | 0.65 | 1.57 | 1.15E-04 | 1.66E-03 | NM_00108147 | NM_00108147 | NM_00108147 | Mm.426145 | 668166    | ENSMUST0000069394 |
| A_52_P32903   | <b>Zzef1</b>     | zinc finger, ZZ-type with EF hand domain 1 | 1.44 | 2.72 | 4.45E-07 | 6.99E-05 | NM_00104553 | NM_00104553 | NM_00104553 | Mm.272030 | 195018    | ENSMUST0000069395 |
